# Supplementary material for: Alu insertion variants alter gene transcript levels
Source: HighWire-hosted journal article supplement (doi:10.1101/gr.261305.120), 2021-11-19
Supplement: Supplemental_Methods.docx [file Supplemental_Methods.docx]

**SUPPLEMENTAL METHODS**

*Polymorphic Alu elements*

Polymorphic *Alu* elements were gathered from prior publications as previously described and prior identifiers were used and expanded (Payer et al. 2017). For convenience we have also listed the identifiers from the 1000 Genomes Project Consortium (Stewart et al. 2011; Witherspoon et al. 2013; The 1000 Genomes Project Consortium 2015; Gardner et al. 2017), when available, in Supplemental Table S1.

*Cell culture*

HEK293T cells were cultured in DMEM (Gibco, Thermo Fisher Scientific) with 10% FBS (ClonTech). MCF10A cells were cultured in DMEM/F-12 (1:1) (Gibco, Thermo Fisher Scientific) with 5% horse serum (Thermo Fisher Scientific), 20ng/ml human epidermal growth factor (hEGF), 10 ug/ml insulin, 0.5 ug/ml hydrocortisone, and 0.1 ug/ml cholera toxin (all supplements from Sigma-Aldrich). T47D-Cas9 cells (Bailey et al. 2016; Thu et al. 2018) were cultured in DMEM (Gibco, Thermo Fisher Scientific), 10% FBS (company), and 4 µg/ml blasticidin (Corning). All cells were grown in 5% CO2 at 37C.

*Genome editing*

Guide RNAs, gRNAs, were designed with MIT CRISPR Design (<http://crispr.mit.edu/>). For loci where the *Alu* was already present in 293T cell line (homozygous: *Alu-*103 and *Alu-*098, and heterozygous: *Alu-*271) or in T47D (heterozygous: *Alu*-098 and *Alu*-103), a gRNA was designed to cut on each side of the *Alu*. For *Alu-*271, 293T is heterozygous for the *Alu*. Therefore, we also performed a separate editing experiment to insert the *Alu*; a single gRNA was designed to cut as close to the *Alu* insertion site as possible. gRNAs were ordered as single stranded oligos (IDT), annealed together, and cloned into pSpCas9(BB)-2A-GFP vector, which contains Cas9 and a GFP marker to aid in the selection of positive transfectants. These gRNA-pSpCas9(BB)-2A-GFP vectors were Sanger sequence verified. Because we wanted perfect edits, no additional or missing sequence and no changes or inclusion of SNPs, we created repair templates by amplification of the region from another cell line gDNA with the desired *Alu* genotype. These products were TA cloned and Sanger sequenced. Point mutations were made in the template to edit any SNPs that existed between the repair template and the 293T locus. All gRNA and repair template sequences are located in Supplemental Table S6.

To isolate a clonal population to start genome editing, 293T cells were single cell sorted to a 96 well plate. A single cell was expanded (293T-A) to a culture of 1.5e5 cells per well on a 12 well plate and transfected with the gRNA- pSpCas9(BB)-2A-GFP constructs and repair templates using FuGENE HD Transfection Reagent (Promega) at a 3:1 reagent:DNA ratio per manufacturer’s protocol. Two days after transfection, cells were pooled and genotyped to confirm that editing had occurred. Positive pools of cells, based on GFP expression, were sorted into single cells, and expanded for 2-3 weeks before genotyping of the single cell outgrowths. PCR products spanning the editing site were sequenced to confirm perfect edits. For each locus, at least 2 perfectly edited lines were derived (Supplemental Table S6). The parental line, 293T-A, was also single cell sorted and re-expanded during the time, to result in two new subclonal lines 239T-A1 and 293T-A2. All qRT-PCR comparisons were thus based on at least 2 clones for each genotype. T47D-cas9 does not grow well at single cell density. Therefore, cells were plated at low density on gelatin coated plates and grown in conditioned media. Clonal outgrowths were selected and expanded. CRISPR edited clones were screened in the same manner as 293T cells. We were only able to identify one T47D cell line with a perfectly edited at the *Alu*-103 (8q24) locus.

*Enhancer Assays*

Because of the large number of loci to evaluate, the luciferase assay vector, pGL4.26 (Promega), was modified at the multiple cloning site to include all sequences necessary for the Gateway cloning system (Thermo Fisher Scientific). Specifically, the attP cassette, ccdB and chloramphenicol resistance flanked by attP sequences, was amplified from pDONR (Thermo Fisher Scientific) using primers tailed with *Kpn*I sites (GGGCCCGGTACCGTTTTCCCAGTCACGACGTT, GCGCGCGGTACCAGGGGATATCAGCTGGATGG). This fragment was then cloned by traditional methods into pGL4.26 at *Kpn*I to generate pGL4.26attP18 (pLH4). To generate locus specific luciferase constructs, each polymorphic locus was amplified from genomic DNA from the Centre d'Etude du Polymorphisme Humain (CEPH) Utah Residents with Northern and Western European Ancestry (CEU) individuals with previously determined *Alu* genotypes (Payer et al. 2017). Primers flanking each polymorphic *Alu* insertion site were designed to amplify ~300 bp of genomic DNA (Supplemental Table S1) and each primer was tailed with attB sequences for use in subsequent Gateway cloning. Although the *Alu*-containing allele (~600 bp) and the pre-insertion allele (~300 bp) are different sizes that our results are a continuum suggests that the difference in size does not explain all of the results. Further, for the outlier loci that we investigate further, we include a control with a scrambled *Alu* placeholder in place of the *Alu* so that constructs for each allele are the same size. Because the ectopic assay measures local, *cis* effects on transcript levels, we considered the gene most likely influenced by the *Alu* to be the gene whose transcription start site is closest to the *Alu* insertion site. Given this assumption, the genomic insert was cloned so that the orientation of the locus is retained now relative to luciferase instead of the candidate gene. For a subset of the loci (n=63), the entire genomic region was also cloned in the opposite orientation with respect to luciferase. The *Alu-*containing allele and the pre-insertion “empty” allele were cloned separately; the region was amplified by PCR with Q5 high-fidelity DNA polymerase (New England BioLabs) and primers listed in Supplemental Table S1 from DNA of Centre d'Étude du Polymorphisme Humain (CEPH) Utah Residents with Northern and Western European Ancestry (CEU) or Yoruba in Ibadan, Nigeria (YRI) (Coriell Institute for Medical Research, Camden, NJ, USA) individuals. The cloned, tested alleles are the naturally occurring alleles. When possible, homozygous individuals were used in PCR or when necessary, the alleles were amplified from heterozygous individuals and gel extraction and purification was used to isolate each allele (Zymoclean Gel DNA Recovery Kit, Zymo Research). PCR products were Gateway cloned into pGL4.26atpP18 following manufacturer’s protocols (Gateway cloning, Thermo Fisher Scientific). For a subset of loci, we generated additional constructs. We replaced the *Alu* sequence with scrambled *Alu* sequence. We evaluated two versions of *Alu*Ya5 scrambled sequence (scr1, scr3, Supplemental Table S4) to ensure that no regulatory sequences were retained and none were created. The scrambled sequences were synthesized (GeneArt, Thermo Fisher Scientific) and then cloned into the vectors containing the genomic locus, replacing the *Alu*, using Gibson assembly method and HiFi DNA assembly master mix (New England BioLabs). Because at all loci evaluated, the two scrambled sequences were statistically the same (Supplemental Fig S5a), the results were combined into a single bar on the graphs. Consistent with these scrambles having no cryptic enhancer sequences, when tested in isolation with no genomic sequence, the luciferase expression levels were the same for the empty vector and vector with scrambles (Supplemental Fig S5b). In other cases, we tested the locus specific *Alu* or consensus *Alu* sequence, in isolation in our ectopic luciferase assay, by amplification of the *Alu* using primers with tailed with attB sites and cloned the *Alu* into the luciferase vector (pGL4.26attP18) using Gateway cloning. To amplify *Alu* consensus sequences, we identified a naturally occurring *Alu* in the reference genome that matched the consensus sequence as closely as possible; in all cases the amplified *Alu* is >97% identical to the consensus and the specific sequences tested are provided in Supplemental Table S4. As additional controls, we evaluated two non-polymorphic, evolutionarily older *Alu* elements with previously identified enhancer functions (Su et al. 2014). *Alu*05 and *Alu*06 were amplified from GM12878 DNA using nested PCR reactions. *Alu*05 was amplified with GCTGTCTCCTCAAAGTCCCT and AGATGTTTGGATTTCTGTCAGGT followed by GGGGACAAGTTTGTACAAAAAAGCAGGCTCTGGCCAGGTGCAGTGG and GGGGACCACTTTGTACAAGAAAGCTGGGTTTGAGATAGACTCTTGCTCTGTCACC; *Alu*06 was amplified with AGAAGAAAATTCCATTGGCCACA and CCATATCAAGGAGCAAAGAGGTG followed by GGGGACCACTTTGTACAAGAAAGCTGGGTTCTGTAGCAGGGAGAGCTGTTT and GGGGACAAGTTTGTACAAAAAAGCAGGCTCTGGCTGGGTGCAGTGACTCA. The SV40 enhancer was amplified from pGL3-control vector (Promega) with primers GGGGACAAGTTTGTACAAAAAAGCAGGCTCTTGAACGATGGAGCGGAGAAT and GGGGACCACTTTGTACAAGAAAGCTGGGTTGATCCGCTGTGGAATGTGTG. All primers for the control *Alu* sequences and the SV40 enhancer contained tailed sequences necessary for Gateway cloning (Thermo Fisher Scientific) of the PCR products into pGL4.26, as above.

All clones were sequence-verified and in most cases, two independent clones were evaluated for each construct. Assays were performed in 96 well format. 24 hours prior to transfection, 8 x 104 HEK293T cells or MCF10A cells or 1 x 104 T47D-Cas9 cells were plated per well on a 96-well plate. For each well,25 pmol of vector was co-transfected with 10 ng of a *Renilla* luciferase expression vector (pRL, Promega) using FuGENE HD (Promega) with a 3:1 ratio or 2.5:1 ratio of reagent:DNA for HEK293T and MCF10A or T47D-Cas9 respectively. After 48 hours, luciferase levels were measured using Dual-glo luciferase assay system (Promega) and the GloMax-Multi Detection System (Promega) as per manufacturer’s protocol. Both *Renilla* and Firefly luciferase levels were normalized to background luminescence levels in wells with no plasmids transfected. Any differences in transfection efficiency were accounted for by normalization of firefly levels to *Renilla* levels in each well. In Figure 1, normalized relative luciferase units are reported as the ratio of the *Alu-*containing allele over the pre-insertion “empty” allele, to most clearly display the effects of the presence of the *Alu* as a fold change in relative luciferase units. In other figures, the absolute normalized relative luciferase units relative to the empty pGL4.26 vector are shown for the indicated construct. Similar results were obtained when constructs were instead normalized to the pGL4.26attP18 vector with a 300 bp sequence with no known cryptic transcription regulators inserted using gateway cloning, confirming that cloning sites from gateway did not alter results (Supplemental Fig S5c). In comparing results between different orientations of the locus or *Alu* with respect to luciferase, the residual plot was generated by graphing luciferase results for the pairs of orientations on a scatter plot and determining the residual distance from the null condition where the orientations have the same effect, y=x. *T*-tests were performed to compare different constructs, and when more than two constructs were evaluated, p=0.05 was adjusted to account for the multiple testing. For all luciferase assays, the error bars represent the standard deviation of at least 12 values, two or more independent clones each tested in two separate transfections and measured in technical triplicate.

*Gene expression analysis by qRT-PCR*

RNA was isolated from the CRISPR edited 293T or T47D cell lines, the parental T47D cell line, and the parental 293T, unedited, but clonally expanded 293T cells using TRIzol (Invitrogen, Thermo Fisher Scientific) and reverse transcribed with SuperScript IV first strand synthesis system (Invitrogen, Thermo Fisher Scientific). qRT-PCR with performed with SsoAdvanced Universal SYBR Green Supermix (Bio-Rad) on the MyIQ cycler (Bio-Rad) or QuantStudio 12K Flex machine (Thermo Fisher Scientific) with the following cycle conditions: 95°C for 30 sec to denature and then 45 cycles of 95°C 15 sec and 60°C for 30 sec for amplification, followed by a melting analysis. All primers are available in Supplemental Table S7. Fold-change expression was determined by the 2-ΔΔCt method and normalization to the house keeping gene actin and then comparison of the cell lines with the *Alu* present to when it is absent for 293T lines (Fig 6) or for the heterozygous cell line to the homozygous no *Alu* present cell lines for T47D (Fig 3B). All measurements were taken as technical triplicates from two separate RNA isolations for each cell line. Because the cell lines with similar genotype for each locus resulted in similar values, we combined them into a single bar on the qRT-PCR graphs. For *Alu-*103, we took this an additional step, and measured gene expression for 8q24 genes in all available 293T cell line derivatives and plot each cell line individually (Supplemental Fig S4).

*eQTL analysis*

Because *Alu* variants are not directly genotyped in most samples, we identified the best proxy SNP for each *Alu* polymorphism. We considered all common SNPs genotyped as part of HapMap (International HapMap et al. 2007) and 1000 Genomes Project(<https://www.internationalgenome.org/>) (Genomes Project et al. 2015; Clarke et al. 2017) . We previously determined *Alu* genotypes in CEPH-CEU samples (Payer et al. 2017). Haploview was used to determine the linkage disequilibrium (LD) between the *Alu* and each SNP in the region (Barrett et al. 2005). A single SNP with the strongest LD was selected as the best proxy for each *Alu* (Supplemental Table S2). We excluded 20 *Alu* variants that did not have a proxy SNP with r2>0.8 from further eQTL analysis. For each proxy SNP, we searched the single tissue eQTLS in GTEx Analysis Release v7. Complete results are in Supplemental Table S2. In figure 2, we show GTEx single tissue expression for 2 tissues.

*Epigenetic Analysis*

The ENCODE genome segmentations using ChromHMM (Ernst and Kellis 2010) for each of the 6 analyzed cell lines (GM12878, H1-hESC, K562, HeLa-S3, and HepG2) were downloaded from USCS genome browser (<https://genome.ucsc.edu>, hg19). The *Alu* polymorphism coordinates were intersected with this data using BEDtools intersect (Quinlan and Hall 2010). Results are in Supplemental Table S3. To examine epigenetic state at some loci more carefully, we viewed the ChromHMM tracks and Integrated Regulation from ENCODE tracks on UCSC genome browser. We viewed the layered H3K4me1, H3K4me3, and H3K27ac tracks as well as DNase Clusters and Transcription Factor ChIP E3 (The ENCODE Project Consortium 2011; The ENCODE Project Consortium 2012; Gerstein et al. 2012; Wang et al. 2012; Wang et al. 2013). Because both the ENCODE data (e.g. The ENCODE Project Consortium 2011; The ENCODE Project Consortium 2012) and 1000 genome project annotation of Alu polymorphisms (The 1000 Genomes Project Consortium 2015) were done on the GRCh37/hg19 human reference genome build, we used this build throughout our analysis and manuscript. Prediction of transcription factor binding sites in *Alu* sequences were determined with PROMO utilizing TRANSFAC version 8.3 (Messeguer et al. 2002; Farre et al. 2003). We considered high quality calls, to be those with a 0% dissimilarity rate. In addition to searching the inserted *Alu* sequence, we also considered the possibility that the presence of the *Alu*, in combination with adjacent sequence at the integration site form a TFBS that alone or in combination with other TFBS creates some of this locus specific effect. Despite careful examination of insertion site boundaries, this was not appreciated.

Supplemental Table S5 contains all putative binding sites with <15% dissimilarity rate.

**REFERENCES**

Bailey SD, Desai K, Kron KJ, Mazrooei P, Sinnott-Armstrong NA, Treloar AE, Dowar M, Thu KL, Cescon DW, Silvester J et al. 2016. Noncoding somatic and inherited single-nucleotide variants converge to promote ESR1 expression in breast cancer. *Nat Genet* **48**: 1260-1266.

Barrett JC, Fry B, Maller J, Daly MJ. 2005. Haploview: analysis and visualization of LD and haplotype maps. *Bioinformatics* **21**: 263-265.

Clarke L, Fairley S, Zheng-Bradley X, Streeter I, Perry E, Lowy E, Tasse AM, Flicek P. 2017. The international Genome sample resource (IGSR): A worldwide collection of genome variation incorporating the 1000 Genomes Project data. *Nucleic Acids Res* **45**: D854-D859.

Ernst J, Kellis M. 2010. Discovery and characterization of chromatin states for systematic annotation of the human genome. *Nat Biotechnol* **28**: 817-825.

Farre D, Roset R, Huerta M, Adsuara JE, Rosello L, Alba MM, Messeguer X. 2003. Identification of patterns in biological sequences at the ALGGEN server: PROMO and MALGEN. *Nucleic Acids Res* **31**: 3651-3653.

Gardner EJ, Lam VK, Harris DN, Chuang NT, Scott EC, Pittard WS, Mills RE, Genomes Project C, Devine SE. 2017. The Mobile Element Locator Tool (MELT): population-scale mobile element discovery and biology. *Genome Res* **27**: 1916-1929.

Gerstein MB, Kundaje A, Hariharan M, Landt SG, Yan KK, Cheng C, Mu XJ, Khurana E, Rozowsky J, Alexander R et al. 2012. Architecture of the human regulatory network derived from ENCODE data. *Nature* **489**: 91-100.

The International HapMap Consortium. 2007. A second generation human haplotype map of over 3.1 million SNPs. *Nature* **449**: 851-861.

Messeguer X, Escudero R, Farre D, Nunez O, Martinez J, Alba MM. 2002. PROMO: detection of known transcription regulatory elements using species-tailored searches. *Bioinformatics* **18**: 333-334.

Payer LM, Steranka JP, Yang WR, Kryatova M, Medabalimi S, Ardeljan D, Liu C, Boeke JD, Avramopoulos D, Burns KH. 2017. Structural variants caused by Alu insertions are associated with risks for many human diseases. *Proc Natl Acad Sci U S A* **114**: E3984-E3992.

Quinlan AR, Hall IM. 2010. BEDTools: a flexible suite of utilities for comparing genomic features. *Bioinformatics* **26**:841-842.

Stewart C, Kural D, Stromberg MP, Walker JA, Konkel MK, Stutz AM, Urban AE, Grubert F, Lam HY, Lee WP et al. 2011. A comprehensive map of mobile element insertion polymorphisms in humans. *PLoS Genet* **7**: e1002236.

Su M, Han D, Boyd-Kirkup J, Yu X, Han JJ. 2014. Evolution of Alu elements toward enhancers. *Cell Rep* **7**: 376-385.

The ENCODE Project Consortium. 2011. A user's guide to the encyclopedia of DNA elements (ENCODE). *PLoS Biol* **9**: e1001046.

The ENCODE Project Consortium. 2012. An integrated encyclopedia of DNA elements in the human genome. *Nature* **489**: 57-74.

The 1000 Genomes Project Consortium. 2015. An integrated map of structural variation in 2,504 human genomes. *Nature* **526**: 75-81.

Thu KL, Silvester J, Elliott MJ, Ba-Alawi W, Duncan MH, Elia AC, Mer AS, Smirnov P, Safikhani Z, Haibe-Kains B et al. 2018. Disruption of the anaphase-promoting complex confers resistance to TTK inhibitors in triple-negative breast cancer. *Proc Natl Acad Sci U S A* **115**: E1570-E1577.

Wang J, Zhuang J, Iyer S, Lin X, Whitfield TW, Greven MC, Pierce BG, Dong X, Kundaje A, Cheng Y et al. 2012. Sequence features and chromatin structure around the genomic regions bound by 119 human transcription factors. *Genome Res* **22**: 1798-1812.

Wang J, Zhuang J, Iyer S, Lin XY, Greven MC, Kim BH, Moore J, Pierce BG, Dong X, Virgil D et al. 2013. Factorbook.org: a Wiki-based database for transcription factor-binding data generated by the ENCODE consortium. *Nucleic Acids Res* **41**: D171-176.

Witherspoon DJ, Zhang Y, Xing J, Watkins WS, Ha H, Batzer MA, Jorde LB. 2013. Mobile element scanning (ME-Scan) identifies thousands of novel Alu insertions in diverse human populations. *Genome Res* **23**: 1170-1181.
