# Supplementary material for: Alu insertion variants alter gene transcript levels
Source: HighWire-hosted journal article supplement (doi:10.1101/gr.261305.120), 2021-11-19
Supplement: Supplemental_Table_S1_final.xlsx [file Supplemental_Table_S1_final.xlsx]

## Sheet: Table S1
Table S1: Evaluated Alu polymorphic loci including GWAS information and primers for cloning
Alu identifier	insertion site (hg19)	ref genome location (hg19)	chr band	Alu strand	Alu length (without polyA) (bp)	polyA length (approx) (bp)	TSD	Alu Sequence	Alu subfamily	in reference genome (hg18)?	primer for cloning (without tail)	primer for cloning (without tail)	geomic locus cloned direction	Alu orientation w.r.t luciferase	luciferase results log 2 (+Alu/-Alu)-Figure 1	error	ectopic assay in both orientations?	secondary clone direction designation	geomic locus cloned direction	luciferase results log 2 (+Alu/-Alu)-Figure 1/S1	error	GWAS Disease/Trait	gwascatalog_SNP_ID	R2	D'	D' bounds	conclusion: LD between TAS and Alu	Alu Haplotype	PUBMED ID for GWAS report	GWAS p-Value	OR or beta	Risk Allele Frequency	Alu identifier	1KGP identifier	CEU allele frequency, calculated from our genotyping	1KGP minor allele frequency	1KGP EUR_AF (minor allele frequency)	1KGP AFR_AF (minor allele frequency)
Alu-031	chr3:148909350-148909351	-	3q25.1	+	265	21	AAGATCAGACACA	TCACGCCTGTAATCCCAGCACTTTGGGAGGCCGAGGCGGGCGGATCACGAGGTCAGGAGATCGAGACCATCCCGGCTAAAATGGTGAAACCCCGTCTCTACTAAAAATACAAAAAATTAGCCGGGCGTAGTGGCGGGCGCCTGTAGTCCCAGCTACTTGGGAGGCTGAGGCAGGAGAATGGCGTGAACCCGGGAGGCGGAGCTTGCAGTGAGCCGAGATCCCGCCACTGCACTCCAGCCTGGGCGACAGANCGAGACTCCGTCTCNNANNAAAANANNAAANNNNA	AluYa5	no	TTCCCTTTGCTTTCCTCTCA	CATTTATTTTGGAGCTGGACATC	plus strand	sense	0.820169	0.0455162	no	.	.	.	.	.	.	.	.	.	.	.	.	.	.		Alu-031	ALU_umary_ALU_2795	.	0.047524	0.001	0.1747
Alu-032	chr19:31017349-31017350	chr19:31017350-31017655	19q12	+	281	21	GAACGGGTTCAGG	GGCCGGGCGCGGTGGCTCACGCCTGTAATCCCAGCACTTTGGGAGGCCGAGGCGGGCGGATCACGAGGTCAGGAGATCGAGACCATCCCGGCTAAAACGGTGAAACCCCGTCTTTACTAAAAATACAAAAAATTAGCCGGGGGTAGTGGCGGGCGCCTGTAGTCCCAGCTACTTGGGAGGCTGAGGCAGGAGAATGGCGTGAACCCGGGAGGCGGAGCTTGCAGTGAGCCGAGATTGCACCACTGCACTCCAGCCTGGGCGACAGAGCGAGACTCCGTTTCAAAAAAAAAAAAAAAAAAAAA	AluYa5	yes	ACCAGGGCTTCAAGATCAAG	GACTGAGAGTACCTGCCCACA	plus strand	antisense	0.7706	0.131239	no	.	.	.	.	.	.	.	.	.	.	.	.	.	.		Alu-032	DEL_pindel_48561	0.837209	0.0397364	0.1193	0.0038
Alu-033	chr6:112203867-112203868	chr6:112203868-112204156	6q21	+	260	41	AAAAAATCAGAAAATAT	CCTGTAATCCCAGCACTTTGGGAGGCCGAGGCGGGCGGATCACGAGGTCAGGAGATCGAGACCATCCTGGCTAACACGGTGAAACCCCGTCTCTACTAAAAATACAAAAAATTAGCCGGGCGTGGTAGCGGGCGCCTGTAGTCCCAGCTACTCGGGAGGCTGAGGCAGGAGAATGGCGTGAACCCGGGAGGCGGAGCTTGCAGTGAGCCGAGATCGCGCCACTGCACTCCAGCCTGGGCGACAGAGCGAGACTCAGTCTCAAAAAAAAAAAAAAAAAAAAAAAAAAAAA	AluY	yes	GGGGAATGCCTATGGCTTAT	TTGCAAATCAAGGTCAACCA	plus strand	sense	1.15506	0.067154	no	.	.	.	.	.	.	.	.	.	.	.	.	.	.		Alu-033	.	0.8	.	.	.
Alu-037	chr12:56753236-56753237	-	12q13.3	-	288	20	AATATCAGACACTTAA	GGCCGGGCGCGGTGGCTCACGCCTGTAATCCCAGCACTTTGGGAGGCCGAGGCGGGTGGATCANGAGGTCAGGAGATCGAGACCATCCTGGCTAACAAGGTGAAACCCCGTCTNTACTAAAAATACAAAAAATTAGCCGGGCGCGGTGGCGGGCGCCTGTAGTCCCAGCTACTCGGGAGGCTGAGGCAGGAGAATGGCGTGAACCCGGGAAGCGGAGCTTGCAGTGAGCCGAGATTGCGCCACTGCAGTCCGCAGTCCGGCCTGGGCGACAGAGCGAGACTCCGTCTCAAAAAAAAAAAAAAAAAAA	AluYb8	no	GGCAGGGGCTATTTTCATTT	TCCCTCTGCTCTGCATTATTT	minus strand	sense	0.155103	0.0883742	yes	F	plus strand	0.369044	0.141825	Psoriasis	rs2066808	1	1	0.83-1.00	strong	Protective	19169254	1e-09	1.34	0.93	Alu-037	ALU_umary_ALU_9228	0.107955	0.0259585	0.0577	0.0015
Alu-041	chr4:9956834-9956835	chr4:9956835-9957143	4p16.1	+	284	19	AAAACTCCAAGTC	GGCCGGGCGCGGTGGCTCACGCTTGTAATCCCAGCACTTTGGGAGGCCGAGGCGGGTGGATCACGAGGTCAGGAGATCGAGACCATCCTGGCTAACACGGTGAAACCCCGTCTCTACTAAAAATACAAAAAAAAATTAGCCGGGCGTGATGGCGGGCGCCTGTAGTCCCAGCTACTGGGGAGGCTGAGGCAGGAGAATGGCGTGAACCCGGGAGGCGGAGCTTGCAGTGAGCCGAGATTGCGCCACTGCACTCCCGCCTGGGCCACAGAGCGAGACTCCGTCTCAAAAAAAAAAAAAAAANNAA	AluYi6	yes	GCCTTCCTCTGGGAACTTTT	GCGTTACAGCAGGAATGAAA	minus strand	antisense	0.935681	0.0805313	yes	F	plus strand	0.442402	0.0704353	Urate levels	rs7442295	0.459	1	0.79-1.00	moderate	Protective	18327256	3e-70	0.35	0.4	Alu-041	.	0.619048	.	.	.
Alu-043	chr1:117078181-117078182	chr1:117078182-117078490	1p13.1	+	280	22	AAAAATTGTAACTTGTT	GGCCGGGCGCGGTGGCTCACGCCTGTAATCCCAGCACTTTGGGAGGCCGAGGCGGGCGGATCACGAGGTCAGGAGATCGAGACCATCCTGGCTAACACGGTGAAACCCCGTCTTTACTAAAAATACAAAAAATTAGCCGGGCGTGGTGGCGGGCGCCTGTAGTCCCAGTTACTCGGGAGGCTGAGGCAGGAGAATGGCGTGAACCCAGGAGGCGGAGCTTGCAGTGAGCCGAGATCGCGCCACTGCACTCCAGCCTGGGCGACAGAGCGAGACTCTGTTTCAAAAAAAAAAAAAAAAAAAAAA	AluY	yes	TGTTGGTTTCTCACCAGGAAA	CCAAGCAGCGGTGAGTAAAT	minus strand	antisense	0.783735	0.0321793	yes	F	plus strand	0.759705	0.0855687	Multiple sclerosis	rs2300747	0.923	1	0.84-1.00	strong	Risk	19525953	3e-10	1.3	0.88	Alu-043	DEL_pindel_1315	0.85	0.285343	0.1093	0.3169
Alu-046	chr12:77908979-77908980	chr12:77908669-77908979	12q21.2	-	282	25	AAAAATATTAAATAT	GGCCGGGCGCGGTGGCTCACGCCTGTAATCCCAGCACTTTGGGAGGCCGAGGCGGGCGGATCACGAGGTCAGGAGATCGAGGCCATCCCGGCTAAAACGGTGAAACCCCGTCTCTACTAAAAATACAAAAAAATTAGCCGGGCGTAGTGGCGGGCGCCTGTAGTCCCAGCTACTTGGGAGGCTGAGGCAGGAGAATGGCGTGAACCCGGGAGGCGGAGCTTGCAGTGAGCCGAGATCCCGCCACTGCACTCCAGCCTGGGCGACAGAGCGAGACTCCGTCTCAAAAAAAAAAAAAAAAAAAAAAAAA	AluYa5	yes	GATATTTTCCCAAGCGCAGT	GATCCACCATGACCTGCTTT	plus strand	antisense	1.10364	0.130608	yes	F	minus strand	1.25917	0.297047	.	.	.	.	.	.	.	.	.	.		Alu-046	.	0.682353	.	.	.
Alu-049	chr12:77965056-77965057	-	12q21.2	+	280	19	AAGAAGTACTGTG	GCCGGGCGCGGTGGCTCACGCCTGTAATCCCAGCACTTTGGGAGGCCGAGGCGGGCGGATCACGAGGTCAGGAGATCAAGACCATCCCGGCTAAAATGGTGAAACCCCGTCTCTACTAAAAATACAAAAAATTAGCCGGGCGTAGTGGCGGGCGCCTGTAGTCCCAGCTACTCGGGAGGCTGAGGCGGGAGAATGGCGTGAACCCGGGAGGCGGAGCTTGCAGTGAGCCGAGATCCCGCCACTGCACTCCAGCCTGGGCGACAGAGCGAGACTCCGTCTCNAAAAAAAAAAAAAAAAA	AluYa5	no	TGGGGCTTCCAGTAGTTTTG	GGGACCAATATGGCCAGATATTA	plus strand	sense	0.731376	0.0754535	no	.	.	.	.	Myopia (pathological)	rs17788937	0.829	1	0.79-1.00	strong	Protective	23049088	4e-15	NR	0.786	Alu-049	ALU_umary_ALU_9355	0.181818	0.0876597	0.1571	0.0174
Alu-051	chr1:56401293-56401294	chr1:56401294-56401607	1p32.2	+	285	24	AGAAATATAGG	GGCCGGGCGCGGTGGCTCACGCCTGTAATCCCAGCACTTTGGGAGGCCGAGGCGGGCGGATCACGAGGTCAGGAGATCGAGACCATCCTGGCTAAAACGGTGAAACCCCGTCTTTACTAAAAATACAAAAAAAAAATTAGCCGGGCGTAGTGGCGGGCACCTGTAGTCCCAGCTACTTGGGAGGCTGAGGCAGGAGAATGGCGTGAACCCAGGAGGCGGAGCTTGCAGTGAGCCGAGATCCCGCCACTGCACTCCAGCCTGGGCAACAGAGCGAGACTCCGTCTCAAAAAAAAAAAAAAAAAAAAAAA	AluYa5	yes	CAGCCAGGAAGGAATCATTG	TGGAGTTCCCAGTGTTCAGA	minus strand	antisense	0.77591	0.0219751	no	.	.	.	.	.	.	.	.	.	.	.	.	.	.		Alu-051	.	.	.	.	.
Alu-052	chr6:11051769-11051770	-	6p24.2	+	280	23	AAAAATGCAACCATTT	GGCCGGGCGCGGTGGCTCACGCCTGTAATCCCAGCACTTTGGGAGGCCGAGGCGGGCGGATCACGAGGTCAGGAGATCGAGACCATCCCGGCTAAAACGGTGAAACCCCGTCTNTACTAAAACTACAAAAAATAGCCGGGCGTAGTGGCGGGCGCCTGTAGTCCTAGNTACTTGGGAGGCTGAGGCAGGAGAATGGCGTGAACCCGGGAGGCGGAGNTTGCAGTGAGCCGAGATCCCGCCANTACACTCCAGCCTGGGGGACAGAGCGAGACTCCGTTTCAAAAAAAAAAAAAAAAAAAAAA	AluYa8	no	AACTGTGACACGTGCTACAA	CTGTAGCCAGCCTTATCTGT	plus strand	sense	1.47678	0.182196	no	.	.	.	.	Phospholipid levels (plasma)	rs1321535	0.406	1	0.80-1.00	moderate	Protective	21829377	1e-38	0.04	NR	Alu-052	ALU_umary_ALU_4959	0.227778	0.120807	0.1024	0.0068
Alu-053	chr3:18756126-18756127	chr3:18755826-18756127	3p24.3	-	280	18	AAGAAGGTGACAG	GCCGGGCGCGGTGGCTCACGCCTGTAATCCCAGCACTTTGGGAGGCCGAGGCGGGCGGATCACGAGGTCAGGAGATCGAGACCATCCCGGCTAAAACGGTGAAACCCCGTTTTTACTAAAAATACAAAAAATTAGCCGGGCGTAGTGGCGGGCGCCTGTAGTCCCAGCTACTTGGGAGGCTGAGGCAGGAGAATGGCGTGAACCCGGGAGGCGGAGCTTGCAGTGAGCCGAGATCCCGCCACTGCACTCCAGCCTGGGCGACAGAGCGAGACTCCGTTTCAAAAAAAAAAAAAAAAA	AluYa5	yes	CCGAACACAATGGGAAGTCA	TTTTCCCCCAACTTACCAAA	minus strand	sense	0.98344	0.0475503	yes	F	plus strand	0.844662	0.0912646	Inflammatory bowel disease	rs4256159	0.93	1	0.86-1.00	strong	Protective	23128233	9e-15	1.11	0.14	Alu-053	.	0.837079	.	.	.
Alu-056	chr4:106636862-106636863	-	4q24	+	281	27	AAAATATTAAAGA	GGCCGGGCGCGGTGGCTCACGCCTGTAATCCCAGCACTTTGGGAGGCCGAGGCGGGCGGATCACGAGGTCAGGAGATNGAGACCATCCCGGNTAAAACGGTGAAACCCCGTTTNTACTAAAAATACAAAAAATTAGCCGGGNGTAGTGGCGGGCGCCTGTAGTCCCAGCTACTTGGGAGGNTGAGGCAGGAGAATGGCGTGAACCCGGGAGGCGGAGCTTGCAGTGAGCCGAGATCCCGCCACTGCACTCCAGCCTGGGCGACAGAGCGAGATTCCGTTTCAAAAAAAAAAAAAAAAAAAAAAAAAAA	AluYa5	no	GGGAGAAAATGGCATCTGTAAG	ATTTCCCGGGTCAAAAATTC	minus strand	antisense	-0.00907297	0.0741746	no	.	.	.	.	.	.	.	.	.	.	.	.	.	.		Alu-056	ALU_umary_ALU_3576	0.0277778	0.0800719	0.0567	0.1694
Alu-057	chr8:116488545-116488546	chr8:116488235-116488545	8q23.3	-	283	29	AGAAAGTATATTTTCT	GGCCGGGCGCGGTGGCTCACGCCTGTAATCCCAGCACTTTGGGAGGCCGAGGCGGGCGGATCACGAGGTCAGGAGATCGAGACCATCCCGGCTAAAACGGTGAAACCCCGTTTTTACTAAAAATACAAAAAAATTAGCCGGGGGTAGTGGCGGGCGCCTGTAGTCCCAGCTACTTGGGAGGCTGAGGCAGGAGAATGGCGTGAACCCGGGAGGCGGAGCTTGCAGTGAGCCGAGATCCCGCCACTGCACTCCAGCCTGGGGGACAGAGCGAGATTCCGTTTCAAAAAAAAAAAAAAAAAAAAAAAAAAAAA	AluYa5	yes	TGAAGCACAGAAAGTAAGCAACA	CCTGAAGCCATGCTTCCTA	minus strand	sense	0.670009	0.123304	yes	F	plus strand	0.0907727	0.0795202	HDL cholesterol	rs2293889	0.795	0.952	0.82-0.99	strong	Risk	20686565	6e-11	0.44	0.41	Alu-057	.	0.355556	.	.	.
Alu-058	chr2:169886549-169886550	chr2:169886235-169886549	2q31.1	-	287	23	AAGAGGAAAGAACT	GGCCGGGCGCGGTGGCTCACGCNTCTAATTTTAGCACTTTGGGAGGCCGAGGGGGGTGGATCATGAGGTCAAGAGATCGAGACCATCCTGGCTAACACGGTGAAACCCCGTTTTTACTAAAAATACAAAAAATTAGCCGGGCGCGGTGGCGGGCGCCCGTAGTCCCAGNTANTCGGGAGGTTGAGGCAGGAGAATGGCGTGAACCCGGGAAGCGGAGCTTGCAGTGAGCCGAGATNNNGCCACTGCAGTCCGCAGTCCGGCCTGGGCGACAGAGCGAGACTCCTTTCAAAAAAAAAAAAAAAAAAAAAAA	AluYb8	yes	GGCTGATAGGGAAGGGAAAT	AATGCCCATTTTGTGGTTTT	plus strand	antisense	0.250777	0.0328514	no	.	.	.	.	.	.	.	.	.	.	.	.	.	.		Alu-058	.	0.912791	.	.	.
Alu-059	chr5:88043465-88043466	chr5:88043155-88043465	5q14.3	-	283	27	AAAAGTAGTAAAAAA	GGGCCGGGGGCGGTGGTTCACGCCTGTAATCCCAGCATTTTGGGAGGCCGAGGCGGGCGGATCAGGAGGTCAGGAAATGGGGACCATCCGGGTTAAAACGGTGAAACCCCGTTTTTATTAAAAATACAAAAAAATTAGCCGGGGGTANGGGGGGGGGCCTGTAGTCCCAGTTACTTGGGGGGNTGAGGCGGGAGAAGGGGGGGAACCCGGGAGGCAGAGNTTCCAGTGAGCCGGGATCCCGCCACTGCACTCCAGCNGGGGGGACAGGGGGGGATTCCGTTTCAAAAAAAAAAAAAAAAAAAAAAAAAAA	AluYa5	yes	AGCCAACTGTCTGGGAATTG	TGAGAATTGGGTGGTCACAA	plus strand	antisense	0.519107	0.0467695	no	.	.	.	.	.	.	.	.	.	.	.	.	.	.		Alu-059	.	0.294444	.	.	.
Alu-063	chr1:162080082-162080083	-	1q23.3	-	280	14	AAAAGTTATTTGGCTGG	CCGGGCGCGGTGGCTCACGCCTGTAATCCCAGCACTTTGGGAGGCCGAGGCGGGCGGATCACGAGGTCAGGAGATCGAGACCATCCCGGCTAAAACGGTGAAACCCCGTCTCTACTAAAAAATACAAAAAATTAGCCGGGCGTAGTGGCGGGCGCCTGTGGTCCCAGCTACTTGGGAGGCTGAGGCAGGAGAATGGCGTGAACCCGGGAGGCGGAGCTTGCAGTGAGCCGAGATCCCGCCACTGCACTCCAGCCTGGGCGACAGANCGAGACTCCGTCTCNAAAAAAAAAANNN	AluYa5	no	GTGACCTCCCCATGTCACTT	CAGCAACAGCCTAAGCCATA	minus strand	sense	-0.0796079	0.190289	no	.	.	.	.	.	.	.	.	.	.	.	.	.	.		Alu-063	ALU_umary_ALU_544	0.0654762	0.119609	0.0318	0.2806
Alu-066	chr20:5943319-5943320	chr20:5943002-5943319	20p12.3	-	285	19	AAGAAATGAAGGC	CGGGCGCGGTGGCTCACGCCTGTAATCCCAGCACTTTGGGAGGCCGAGGCGGGTGGATCATGAGGTCGGGAGATCGAGACCATCCTGGCTAACAAGGTGAAACCCCGTCTCTACTAAAAATACAAAAAATTAGCCGGGCGCGGTGGCGGGCGCCTGTAGTCCCAGCTACTCGGGAGGCTGAGGCAGGAGAATGGCGTGAACCCGGGAAGCGGAGCTTGCAGTGAGCCGAGATTGCGCCACTGCAGTCCGCAGTCCGGCCTGGGCGACAGAGCGAGACTCCGTCTCAAAAAAAAAAAAAAAAAA	AluYb8	yes	GTGCAGTTGGTAGGCAGAAA	GCACTTGTTTGGTGTTTGGA	plus strand	antisense	0.0964871	0.0493048	yes	F	minus strand	0.47531	0.196474	.	.	.	.	.	.	.	.	.	.		Alu-066	.	0.738889	.	.	.
Alu-072	chr1:8501990-8501991	-	1p36.23	-	287	13	AAAAAGTGTGTGTATTG	GCCGGGCGCGGTGGCTCACGCCTGTAGTCCCAGCACTTTGGGAGGCCGAGGCGGGTGGATCATGAGGTCAGGAGATCGAGACCATCCTGGCTAACACGGTGAAACCCCGTCTTTACTAAAAATACAAAAAATTAGCCGGGCGCGGTGGCGGGCGCCTGTAGTCCCAGCTACTGGGGAGGCTGAGGCAGGAGAATGGCGTGAACCCGGGAAGCGGAGCTTGCAGTGAGCCGAGATTGCGCCACTGCAGTCCGCAGTCCGGCCTGGGCGACAGAGCGAGACTCCGTTTCAAAAAAAAAAAAA	AluYb9	no	AAGGTTTCTGGGCACTTACG	GCACATCACATGATGAAAGGA	plus strand	antisense	-0.14961	0.0804531	no	.	.	.	.	.	.	.	.	.	.	.	.	.	.		Alu-072	ALU_umary_ALU_20	0.138889	0.0742812	0.1272	0.0053
Alu-074	chr7:120881116-120881117	chr7:120881116-120881430	7q31.31	+	285	33	AAAAAGAAATTATAAAACAG	GGCCGGGCGNGGTGGCTCANNCCTGTAATCCCAGCACTTTGGGAGGCCGAGGCGGGCGGATCANGAGGTCAGGAGATNGAGACCATCCCGGTTAAAACGGTGAAACCCCGTTTTTATTAAAAATACAAAAAAAAAAATTAGCCGGGGGTAGTGGCGGGCGCCTGTAGTCCCAGCTACTTGGGAGGCTGAGGCAGGAGAATGGCGTGAACCCGGGAGGGGGAGCTTGCAGTGAGCCGAGATCCCGCCACTGCACTCCAGCCTGGGGGACAGAGGGAGATTCCGTTTCAAAAAAAAAAAAAAAAAAAAAAAA	AluYa5	yes	TTGGAGAAAACGAGGGTCTG	AAGATGTGGAGGAGGTTGGTT	plus strand	sense	-0.395725	0.0498569	yes	F	minus strand	-0.275581	0.0779013	Bone mineral density	rs4609139	0.852	0.959	0.85-1.00	strong	Protective	22792070	1e-10	0.08	0.355	Alu-074	DEL_pindel_23720	0.588889	0.288938	0.3569	0.3843
Alu-076	chr5:109297408-109297409	chr5:109297102-109297408	5q21.3	-	281	28	AGAAAGTGCCTAACAT	GGCCGGGCGCGGTGGCTCACGCCTGTAATCCCAGCACTTTGGGAGGCCGAGGCGGGCGGATCACGAGGTCAGGAGATCGAGACCATCCCGGCTAAAACGGTGAAACCTCGTCTCTACTAAAAATACAAAAAATTAGCCGGGCGTAGTGGCGGGCGCCTGTAGTCCCAGCTACTTGGGAGGCTGAGGCAGGAGAATGGCGTGAACCCGGGAGGCGGAGCTTGCAGTGAGCCGAGATCCCGCCACTGCACTCCAGCCTGGGCGACAGAGCGAGACTCCGTCTCAAAAAAAAAAAAAAAAAAAAAAAAAAAA	AluYa5	yes	CAGAGCCCTACAAGAGGAGA	TTTCAGTCTTGGACCATTTCAG	minus strand	sense	1.5792	0.0638254	no	.	.	.	.	.	.	.	.	.	.	.	.	.	.		Alu-076	.	0.961111	.	.	.
Alu-077	chr21:39004560-39004561	-	21q22.13	+	288	19	AAAAATTACCTCGT	GGCCGGGCGCGGTGGCTCACGCCTGTAATCCCAGCACTTTGGGAGGCCGAGGCGGGTGGATCATGAGGTCAGGAGATCGAGACCATCCTGGCTAACAAGGTGAAACCCCGTCTCTACTAAAAATACAAAAAATTAGCCGGGCGCAGTGGCGGGCGCCTGTAGTCCCAGCTACTCGGGAGGCTGAGGCAGGAGAATGGCGTGAACCCGGGAAGCGGAGCTTGCAGTGAGCCGAGATTGCGCCACTGCAGTCCGCAGTCCGGCCTGGGCGACAGAGCGAGACTCCGTCTCNAAAAAAAAAAAAAAAAAAA	AluYb8	no	TGGCTGCATTTTCCTCTTTC	GCCTTTATTGATTCTCACTGTGG	minus strand	antisense	0.622262	0.0329365	yes	F	plus strand	0.674684	0.00994273	.	.	.	.	.	.	.	.	.	.		Alu-077	ALU_umary_ALU_12411	0.288889	0.135982	0.1809	0.0318
Alu-079	chr1:101388871-101388872	chr1:101388562-101388871	1p21.2	-	280	26	AAATCTATTCTA	GGCTGGGCGCGGTGGCTCACGCCTGTAATCCCAGCACTTTGGGAGGCCGAGGCGGGCGGATCACGAGGTCAGGAGATCGAGACCATCCTGGCTAACACGGTGAAACCCCGTCTCTACTAAAAATACAAAAAATTAGCCGGGCGAGGTGGCGGGCGCCTGTAGTCCCAGCTACTCGGGAGGCTGAGGCAGGAGAATGGCGTGAACCCCAGGGGGCGGAGCCTGCAGTGAGCCGAGATTGCGCCACTGCACTCCAGCCTGGGCGACAGCGAGACTCCGTCTCAAAAAAAAAAAAAAAAAAAAAAAAAAAA	AluYe5	yes	AGCAGAGTTATTTCCCTGTTCA	TCTGCTAGAGGCCAGACTCA	plus strand	antisense	0.986607	0.0531109	yes	F	minus strand	1.32819	0.131286	Multiple sclerosis	rs11581062	0.486	0.916	0.68-0.98	moderate	Protective	21833088	3e-10	1.12	NR	Alu-079	.	0.817647	.	.	.
Alu-081	chr14:55795852-55795853	-	14q22.3	-	281	10	AGAAATAAACCACGTTTTA	GGCCGGGCGCGGTGGCTCACGCCTGTAATCCCAGCACTTTGGGAGGCCGAGGCGGGCGGATCACGAGGTCAGGAGATCGAGACCATCCTGGCTAACACAGTGAAACCCCGTCTCTACTAAAAATACAAAAAATTAGCCGGGCGTAGTGGCGGGCGCCTGTAGTCCCAGCTACTCGGGAGGCTGAGGCAGGAGAATGGCGTGAACCCGGGAGGCGGAGCTTGCAGTGAGCCGAGATCGCGCCACTGCACTCCAGCCTGGGCGACAGAGCGAGACTCCGTCTCAAAAAAAAAA	AluY	no	GGTCCAGCTGTATGCCTTTG	AAAACCTGGTGAAACATCCTTT	plus strand	antisense	0.600008	0.0818874	yes	F	minus strand	0.469161	0.107102	Protein biomarker	rs2274273	0.568	0.894	0.72-0.97	moderate		23056639	2e-188	0.19	0.41	Alu-081	ALU_umary_ALU_10325	0.383721	0.228435	0.2783	0.171
Alu-082	chr4:86661078-86661079	chr4:86660768-86661078	4q21.23	-	281	26	AAGATTGAACGTG	GGCCGGGCGCGGTGGCTCACGCCTGTAATCCCAGCACTTTGGGAGGCCGAGGTGGGCGGATCACGAGGTCAGGAGATCGAGACCATTCTGGCTAACACGGTGAAACCCCGTCTCTACTAAAAATACAAAAAATTAGCCGGGCGTGGTAGCGGGCGCCTGTAGTCCCAGCTACTCGGGAGGCTGAGGCAGGAGAATGGCGTGAACCCGGGAGGCGGAGCTTGCAGTGAGCCGAGATCGCGCCACTGCACTCCAGCCTGGGCGACAGAGCGAGACTCCATCTCAAAAAAAAAAAAAAAAAAAAAAAAAA	AluY	yes	AACAAAACCCAAAGGCATGT	TCCATTTTCTTCCAAATTCCAG	minus strand	sense	0.444037	0.02639	no	.	.	.	.	.	.	.	.	.	.	.	.	.	.		Alu-082	.	.	.	.	.
Alu-083	chr17:79577696-79577697	chr17:79577697-79578007	17q25.3	+	288	16	AAAATGACACAAACCA	GGCCGGGCGCGGTGGCTCACGCCTGTAATCCCAGCACTTTGGGAGGCCGAGGCGGGTGGATCATGAGGTCAGGAGATCGAGACCATCCTGGCTAACAAGGTGAAACCCCGTCTCTACTAAAAATACAAAAAATTAGCCGGGCGCGGTGGCGGGCGCCTGTAGTCCCAGCTACTCGGGAGGCTGAGGCAGGAGAATGGCGTGAACCCGGGAAGCGGAGCTTGCAGTGAGCCGAGATTGCGCCACTGCAGTCCGCAGTCCGGCCTGGGCGACAGAGCGAGACTCCGTCTCAAAAAAAAAAAAAAA	AluYb8	yes	GGAGTGCAGTGGTGATCGT	CTGCCTTTGGCCAATAAACT	minus strand	antisense	0.894715	0.0592181	yes	F	plus strand	1.141	0.128699	Eye color traits	rs9894429	0.813	1	0.89-1.00	strong	Risk	20463881	9e-14	0.12	NR	Alu-083	DEL_pindel_46359	0.352273	0.360423	0.5775	0.3245
Alu-085	chr3:190669807-190669808	chr3:190669808-190670118	3q28	+	281	31	AAAGAGTGTA	GGCCGGGCGCGGTGGCTCACGCCTGTAATCCCAGCACTTTGGGAGGCCGAGGCGGGCGGATCACAAGGTCAGGATATCAAGACCATCCTGGCTAACACGGTGAAACCCCGTCTCTACTAAAAATACAAAAAATTAGCCAGGCGTGGTAGCGGGCGCCTGTAGTCCCAGCTACTCGGGAGGCTGAGGCAGGAGAATGGCGTGAACCCGGGAGGCGGAGCTTGCAGTGAGCTGAGATCGCGCCACTGCACTCCAGCCTGGGCGACAAANCGAGACTCCGTCTCAAANAAAAAAAAAAAAANNNAAAAAAAAGAA	AluY	yes	AAAGATGTTGTTCCTCTTTCTTCTG	TTGCCAAATTTGATGGAAACT	minus strand	antisense	0.741335	0.0336598	yes	F	plus strand	0.290348	0.0181874	Alzheimer's disease biomarkers	rs9877502	1	1	0.94-1.00	strong	Protective	23562540	5e-09	0.05	NR	Alu-085	.	0.561111	.	.	.
Alu-086	chr7:157350777-157350778	-	7q36.3	-	288	22	AACAATCCACCCTTGAA	GGCCGGGCGCGGTGGCTCACGCCTGTAATCCCAGCACTTTGGGAGGCCGAGGCGGGTGGATCATGAGGTCAGGAGATCGAGACCATCCTGGCTAACAAGGTGAAACCCCGTNTTTACTAAAAATACAAAAAATTAGCCGGGCGCGGTGGCGGGCGCCTGTGGTCCCAGTTACTCGGGAGGNTGAGGCAGGAGAATGGCGTGAACCCGGGAAGCGGAGCTTGCAGTGAGCCGAGATTGCGCCACTGCAGTCCGCAGTCCGGCCTGGGCGACAGAGCGAGATTCCGTTTCAAAAAAAAAAAAAAAAAAAAAA	AluYb8	no	TGAAATGCCTCCAGATCCTT	TGAGGACCTAGCCACATCGT	plus strand	antisense	0.717388	0.066714	no	.	.	.	.	.	.	.	.	.	.	.	.	.	.		Alu-086	ALU_umary_ALU_6521	0.473333	0.277955	0.3817	0.3676
Alu-090	chr13:78584663-78584664	-	13q22.3	-	280	20	AAGATTTG	GCCGGGCGCGGTGGCTCACGCCTGTAATCCCAGCACTTTGGGAGGCCGAGGCGGGCGGATCACGAGGTCAGGAGATCGAGACCATCCCGGCTAAAACGGTGAAACCCCGTCTCTACTAAAAATACAAAAAATTAGCCGGGCGTAGTGGCGGGCGCCTGTAGTCCCAGCTACTTGGGAGGCTGAGGCGGGAGAATGGCGTGAACCCGGGAGGCGGAGCTTGCAGTGAGCCGAGATCCCGCCACTGCACTCCAGCCTNNCGACAGAGCGAGACTCCGTCTCNANAAAAAAAAAAAAAAAAAAA	AluYa5	no	TGTGGGCCATACACAAACAG	TGCACTGATCTGTCCAGTACAC	plus strand	antisense	-0.716653	0.039075	yes	F	minus strand	-0.53374	0.0924728	Hair color	rs975739	0.874	0.955	0.84-0.99	strong	Protective	23548203	2e-14	0.08	NR	Alu-090	ALU_umary_ALU_9941	0.589286	0.342252	0.4642	0.2655
Alu-093	chr5:88032029-88032030	chr5:88032030-88032345	5q14.3	+	288	25	AAATATTTCAGCAACTC	GGCCGGGCGCGGTGGCTCACGCCTGTAATCCCAGCACTTTGGGAGGCCGAGGCGGGTGGATCATGAGGTCAGGAGATCGAGACCATCCTGGCTAACAAGGTGAAACCCCGTCTCTACTAAAAATACAAAAAATTAGCCGGGCGCGGTGGCGGGCGCCTGTAGTCCCAGCTACTCGGGAGGCTGAGGCAGGAGAATGGCGTGAACCCGGGAAGCGGAGCTTGCAGTGAGCCGAGATTGCGCCACTGCAGTCCGCAGTCCGACCTGGGCGACAGAGCGAGACTCCGTCTCAAAAAAAAAAAAAAAAAAAAAAAAA	AluYb8	yes	CCTCTCCTCCTTCCATCTCC	CCTTGAGTGGGTTGGTTAGC	plus strand	sense	0.192984	0.310523	no	.	.	.	.	.	.	.	.	.	.	.	.	.	.		Alu-093	DEL_pindel_16060	0.170588	0.522764	0.5686	0.4297
Alu-095	chr1:222034158-222034159	chr1:222034159-222034468	1q41	+	281	17	AAAAGTAGAAAAAGC	GGCCGGGCGCGGTGGCTCACGCCTGTAATCCCAGCACTTTGGGAGGCCGAGGCGGGCGGATCACGAGGTCAGGAGATCGAGACCATCCCGGCTAAAACGGTGAAACCCCGTCTCTACTAAAAATACAAAAAATTAGCCGGGCGTAGTGGCGGGCGCCTGTAGTCCCAGCTGCTTGGGAGGCTGAGGCAGGAGAATGGCGTGAACCCGGGAGGCGGAGCTTGCAGTGAGCCGAGATCCCGCCACTGCACTCCAGCCTGGGCGACAGAGCGAGACTCCGTCTCAAAAAAAAAAAAAAAAA	AluYa5	yes	GAGTTCATGGGAGGGTAGGG	TTCTTCGGGACAAATAACCA	minus strand	antisense	0.93177	0.0841277	yes	F	plus strand	2.30024	0.0891005	Colorectal cancer	rs6691170	0.424	1	0.81-1.00	moderate	Protective	20972440	1e-09	1.06	NR	Alu-095	.	0.398876	.	.	.
Alu-096	chr1:66135720-66135721	chr1:66135721-66136033	1p31.3	+	284	32	ATTCACCA	GGCCGGGGGGGGTGGCTCACGCNTGTAATCCCAGCACTTTGGGNGNNNGAGGGGGGNGGATCNNGNGGTCNGGAGATNGAGACCATCCCGGCTAAAACGGTGAAACCCCTTTTTTANTAAAAATACAAAAAAAAATTACCCGGGGGTAGGGGGGGGCCCCTGTAGTCCCAGTTATTTGGGAGGNTGAGGCGGGAGAATGGGGTGAACCCAGGAGGCAGAGTTTGCAGTGAGCCAAGATCCCCCCACTCCACGGCAGCCTGGGGGACAGATTGGGATTTTTTTTCAAAAAAAAAAAAAAAAAAATAAAAAAAAAAAA	AluYa5	yes	AGACTCCACCCAAACAGCAG	TGATTTCATCTTTGTCCATGAG	minus strand	antisense	-0.524859	0.0316344	no	.	.	.	.	.	.	.	.	.	.	.	.	.	.		Alu-096	DEL_pindel_820	0.893258	0.230431	0.174	0.2935
Alu-098	chr6:13718467-13718468	-	6p23	-	270	19	AAAACCACCAGATC	AGGCCGGGCGCGGTGGCTCACGCCTGTAATCCCAGCACTTTGGGAGGCCGAGGCGGGCGGATCACGAGGTCAGGAGATCGAGACCACGGTGAAACCCCGTCTNTACTAAAAATACAAAAAATTAGCCGGGCGCAGTGGCGGGCGCCTGTAGTCCCAGNTACTCGGGAGGNTGAGGCAGGAGAATGGCGTGAACCCGGAAGGTGGAGCTTGCAGTGAGCGGAGATCGCGCCACAGCACTCCCGCCTGGGCGACAGAACGAGACTCCGTTTCAAAAAAAAAAAAAAAAAAAAAAA	AluYd8	no	CCCACCAGTAAAGGAGAGACTG	GGCCTCTGTGGATTTTGTTT	minus strand	sense	2.09751	0.132357	yes	F	plus strand	2.76583	0.0305597	Breast cancer	rs204247	1	1	0.93-1.00	strong	Protective	23535729	8e-09	1.05	0.43	Alu-098	ALU_umary_ALU_4976	0.54023	0.417931	0.4463	0.4894
Alu-099	chr5:4075833-4075834	-	5p15.33	-	281	27	AAAAGAAAGCCTC	GGCCGGGCGCGGTGGCTCACGCCTGTAATCCCAGCACTTTGGGAGGCCGAGGCGGGCGGATCACGAGGTCAGGAGATCGAGACCATCCTGGCTAAAACGGTGAAACCCCGTCTCTACTAAAAATACAAAAAATTAGCCGGGCGTAGTGGCGGGCGCCTGTAGTCCCAGCTACTTGGGAGGCTGAGACAGGAGAATGGCGTGAACCCGGGAGGCGGAGCTTGCAGTGAGCCGAGATCCCGCCACTGCACTCCAGCCTGGCGACAGAGCGAGACTCCGTCTCNAAAAAAAAAAAAAAAAAAAAAA	AluYa5	no	TCCTGTACCTGGATGTTGGC	TCTGTCCAGGATTATTACCAGCT	plus strand	antisense	0.72669	0.103261	yes	F	minus strand	0.579097	0.0601413	Myocardial infarction	rs11748327	0.816	0.949	0.82-0.99	strong	.	21107343	5e-13	1.25	NR	Alu-099	ALU_umary_ALU_4041	0.264045	0.118411	0.1849	0.0688
Alu-101	chr2:21381180-21381181	-	2p24.1	+	288	14	AAAAATTACATGTAT	GGCCGGGCGCGGTGGCTCACGCCTGTAATCCCAGCACTTTGGGAGGCCGAGGCGGGTGGATCACGAGGTCAGGAGATCGAGACCATCCTGGCTAACAAGGTGAAACCCCGTCTCTACTAAAAATACAAAAAATTAGCCGGGTGCGGTGGCGGGCGCCTGTAGTCCCAGCTACTCGGGAGGCTGAGGCAGGAGAATGGCGTGAACCCAGGAAGCGGAGCTTGCAGTGAGCCGAGATTGCGCCATTGCAGTCCGCAGTCCGGCCTGGGCAACAGAGCGAGACTCCGTCTCAAAAAAAAAAAAAAA	AluYb8	no	AATGGCTATTTTCCCTTC	TCCCATAAACCTTTTGAAGTCC	plus strand	sense	0.480787	0.111492	yes	F	minus strand	0.47164	0.275964	.	.	.	.	.	.	.	.	.	.		Alu-101	ALU_umary_ALU_1048	0.371951	0.292532	0.2833	0.0507
Alu-102	chr14:98494376-98494377	-	14q32.2	-	286	27	AACTGTCTTTGAGTTGG	CCGGGCGCGGTGGCTCACACCTGTAATCCCAGCACTTTGGGAGGCCGAGGCGGGTGGATCATGAGGTCAGGAGATCGAGACCATCCTGGCTAACAAGGTGAAACCCCGTCTCTACTAAAAATACAAAAAATTAGCCGGGCGCGGTGGCGGGCGCCTGTAGTCCCAGCTACTCGGGAGGCTGAGGCAGGAGAATGGCGTGAACCCGGGAAGCGGAGCTTGCAGTGAGCCGAGATTGCGCCACTGCAGTCCGCAGTCCGGCCTGGGCGACAGAGCGAGACTCCGTCTCAAAAAAAAAAAAAACAAAACAAAACAA	AluYb8	no	AGGGAGTGCCTGAGAATGAA	AGTGTAAGGAGGGCGGATGT	minus strand	sense	0.40308	0.0331664	yes	F	plus strand	0.627599	0.0380308	Type 1 diabetes	rs4900384	0.776	0.947	0.81-0.99	strong	Protective	19430480	4e-09	1.09	0.29	Alu-102	ALU_umary_ALU_10518	0.703488	0.34405	0.5547	0.202
Alu-103	chr8:128356667-128356668	-	8q24	+	114	27	AAAAATTGCCTGGCT	GGGAGGCTGAGGCAGGAGAATGGCGTGAACCCGGGAAGCGGAGCTTGCAGTGAGCCGAGATTGCGCCACTGCAGTCCGCAGTCCGGCCTGGGCGACAGAGCGAGACTCCGTCTCAAAAAAAAAAAAAAAAAAAAAAAAAAAA	AluYb8	no	TCATCTGACATCAAAGCGTACA	CCAGATGCTCACAGTGGTGT	minus strand	antisense	1.73284	0.0775166	yes	f	plus strand	1.22431	0.0829761	Breast cancer	rs13281615	0.765	1	0.89-1.00	strong	Risk	23535729	1e-27	1.09	0.41	Alu-103	ALU_umary_ALU_7143	0.410112	0.183107	0.2107	0.1641
Alu-168	chr8:109210923-109210924	-	8q23.1	-	283	26	AAAAAACAGT	GNTGGCNGGNGGGGGTGGTTCACNCNTGTAATTCCAGCACTTTGGGAGGCCGAGGCGGGGGAATCANGAGTTCAGGAGATTGAGACCATNNTGNTNACACGGTGAAACCCCGTTTTTANTAAAAATACAAAAAATTAGCCGGGNGTAGGGGCGGGCGCCGGTNTTCCCAGNNNTTGGGAGGATGAGGCAGGAGAAGGGNNTGAACCCGGGAGGGGGAGCTTGCANTGAGCNGAGATTGCGCCNCTGCATTCCAGCTTGGGNGACAGAGCGAGACTCCNNTTNAAAAAAAAAAAAAAAAAAAAAAAA	AluY	no	GGTCAACTGTGGGTATATATGGTA	TGAATAATTAATGCTCACTTCTACCA	plus strand	antisense	0.405895	0.0402479	no	.	.	.	.	.	.	.	.	.	.	.	.	.	.		Alu-168	ALU_umary_ALU_7029	.	0.0173722	0.001	0.059
Alu-181	chr10:30896100-30896101	-	10p11.23	-	107	n/a	CCTGTAATCCCAGCACTTT	TGGAAGCCGAGGGGGGCAGATCACGAGGTCAAGAGATCAAGACCATCCTGGCCAACATAGTGAAACTCCGTCTTTACTAAAAATACAAAAATTA	AluSc	no	GGACAGAGGACCTGGAGCTA	AAGCACAAGGGCAGAAGCTA	minus strand	sense	0.120458	0.0531374	yes	F	plus strand	-0.00483269	0.0455524	Dental caries	rs399593	1	1	0.90-1.00	strong	.	23064961	9e-09	NR	NR	Alu-181	.	0.816092	.	.	.
Alu-202	chr4:106550746-106550747	-	4q24	-	282	15	AAAACATTGCAGATTTG	GCCGGGCGCGGTGGCTCACGCCTGTAATCCCAGCACTTTGGGAGGCCGAGGCGGGCGGATCACGAGGTCAGGAGATCGAGACCATCCCGGCTAAAAGGGTGAAACCCCGTCTCTACTAAAAATACAAAAAAAATTAGCCGGGCGTAGTGGCGGGCGCCTGTAGTCCCAGCTACTTGGGAGGCTGAGGCAGGAGAATGGCGTGAACCCGGGAGGCGGAGCTTGCAGTGAGCCGAGATCCCGCCACTGCACTCCAGCCTGGGCGACAGAGCGAGACTCCGTCTCNAAAAAAAAAAAAAA	AluYa5	no	GAAAGGCAAGCAATGGAGTT	ACAGGACTTCGGGAAAATCA	minus strand	sense	0.024853	0.0206069	no	.	.	.	.	.	.	.	.	.	.	.	.	.	.		Alu-202	ALU_umary_ALU_3575	0.0166667	0.102636	0.0477	0.2511
Alu-204	chr3:46223795-46223796	chr3:46223519-46223795	3p21.31	-	248	19	AAGAAGAAAACAC	GCACTTTGGGAGGCCGAGGCGGGCGGATCACGAGGTCAGGAGATCGAGACCATCCCGGCTAAAACGGTGAAACCCCGTCTCTACTAAAAATACAAAAAATTAGCCGGGCGTGGTGGCGGGCGCCTGTAGTCCCAGCTACTTGGGAGGCTGAGGCAGGAGAATGGCGTGAACCCGGGAGGCGGAGCTTGCAGTGAGCCGAGATCCCGCCACTGCACTCCAGCCTGGGCGACAGAGCGAGACTCCGTCTCAAAAAAAAAAAAAAAAAAA	AluYa5	yes	ATTAAGCCCATCCAGCAAAT	TCATTTGCCATAGCAAGAACC	minus strand	sense	0.707404	0.0384165	no	.	.	.	.	.	.	.	.	.	.	.	.	.	.		Alu-204	.	.	.	.	.
Alu-208	chr5:23910436-23910437	chr5:23910437-23910714	5p14.2	+	258	15	AAAAAATCATTCTC	GGCCGGGCGCGGTGGCTCACGCCTGTAATCCCAGCACTTTGGGAGGCCGAGGCGGGCGGATCACGAGGTCAGGAGATCGAGACCCCGTCTTTACTAAAAATACAAAAAATTAGCCGGGCGTGGTAGCGGGCGCCTGTAGTCCCAGCTACTCGGGAGGCTGAGGCAGGAGAATGGCGTGAACCCGGGAGGCGGAGCTTGCAGTGAGCCGAGATCGCGCCACTGCACTCCAGCCTGGGCGACAGAGCGAGACTCCGTCTCAAAAAAAAAAAA	AluYc	yes	TTCTCCTCCTTAACAATTTGGTC	CACTGAAGGATTTATTTTTAAGATTGC	minus strand	antisense	1.5344	0.0722335	no	.	.	.	.	.	.	.	.	.	.	.	.	.	.		Alu-208	DEL_pindel_14967	0.933333	0.150559	0.0805	0.2648
Alu-212	chr3:37593903-37593904	-	3p22.2	+	288	25	ATAAAAGTATAGATTTTA	GGCCGGGCGCGGTGGCTCACGCCTGTAATCCCAGCACTTTGGGAGGCCGAGGCGGGTGGATCATGAGGTCAGGAGATCGAGACCATCCTGGCTAACAAGGTGAAACCCCGTCTNTACTAAAAATACAAAAAATTAGCCGGGCGCGGTGGCGGGCGCCTGTAGTCCCAGCTACTGGGGAGGNTGAGGCAGGAGAATGGCGTGAACCCGGGAAGCGGAGCTTGCAGTGAGCCGAGATTGCGCCANTGCAGTCCGCAGTCCGGCCTGGGCGACAGAGCGAGACTCCGTTTCAAAAAAAAAAAAAAAAAAAAAAAAA	AluYb9	no	CAGCTGGATCTGGGTAAAGG	CACCTGGCCCAAAATAAAAA	minus strand	antisense	-0.052262	0.160557	no	.	.	.	.	.	.	.	.	.	.	.	.	.	.		Alu-212	ALU_umary_ALU_2293	.	0.0217652	0.001	0.0779
Alu-213	chr3:123126629-123126630	-	3q21.1	+	281	13	AAAAAAAAAAAAGTTG	GGCCGGGCGCGGTGGCTCACGCCTGTAATCCCAGCACTTTGGGAGGCCGAGGCGGGCGGATCACGAGGTCAGGAGATCGAGACCATCCCGGCTAAAACGGTGAAACCCCGTCTCTACTAAAAATACAAAAAATTAGCCGGGCGTAGTGGCGGGCGCCTGTAGTCCCAGCTACTTGGGAGGCTGAGGCAGGAGAATGGCGTGAACCCGGGAGGCGGAGCTTGCAGTGAGCCGAGATCCCGCCACTGCACTCCAGCCTGGGCGACAGAGCGAGACTCCGTCTCNNAAAAAAAAAAA	AluYa5	no	GAGGCCAAAGCAGGAGGTAT	GAGACCACCTCTGATATTTCTT	plus strand	sense	1.26358	0.0737833	no	.	.	.	.	.	.	.	.	.	.	.	.	.	.		Alu-213	ALU_umary_ALU_2676	0.255556	0.0928514	0.0855	0.0893
Alu-215	chr1:197011871-197011872	-	1q31.3	+	252	25	AAGAATCTCTTGA	CCCAGCACTTTGGGAGGCCGAGGCGGGCGGATCACGAGGTCAGGAGATCGAGACCATCCCGGCTAAAACGGTGAAACCCCGTCTCTACTAAAAATACAAAAAATTAGCCGGGCGTAGTGGCGGGCGCCTGTAGTCCCAGCTACTTGGGAGGCTGAGGCAGGAGAATGGCGTGAACCCGGGAGGCGGAGCTTGCAGTGAGCCGAGATTGCGCCACTGCACTCCAGCCTGGGCGACAGAGCGAGACTCCGTCTCAAAAAAAAAAAAAAAAAAAAAAAAA	AluYa5	no	AAACAGGAAGCATTTCGAGGT	TTCTTCAAGTCCTGGCTGCT	plus strand	sense	0.814523	0.0976959	no	.	.	.	.	.	.	.	.	.	.	.	.	.	.		Alu-215	.	0.246914	.	.	.
Alu-216	chr11:4802535-4802536	chr11:4802536-4802837	11p15.4	+	248	40	AAAAACTGATTGCA	GGGAGGCCGAGGTGGGTGGATCATGAGGTCAGGAGATCGAGACCATCCTGGCTAACAAGGTGAAACCCCGTCTCTACTAAAAATACAAAAAATTAGCCGGGCGCGGTGGCGGGCGCCTGTAGTCCCAGCTACTCGGGAGGCTGAGGCAGGAGAATGGCGTGAACCCGGGAAGCGGAGCTTGCAGTGAGCCGAGATTGCGCCACTGCAGTCCGCAGTCCGGCCTGGGCGACAGAGCGAGACTCCGTCTCAAAAAAAAAAAAAAAAAAAAAAAAAAAAAAA	AluYb8	yes	TATCTCAGCAAACCTGCCTTA	CACAGAGACAAACCACATCAGG	minus strand	antisense	-0.265823	0.0357235	yes	F	plus strand	0.52905	0.0610558	.	.	.	.	.	.	.	.	.	.		Alu-216	DEL_pindel_32669	0.801136	0.23103	0.2634	0.4614
Alu-251	chr3:87520483-87520484	-	3p11.2	+	243	22	AAGAGATAAAGTTGG	TTGGGAAGCCGAGGCGGGCGGATCACGAGGTCAGGAGATCGAGACCATCCCGGCTAAAACGGTGAAACCCCATCTCTACTAAAAATACAAAAAATTAGCCGGGCGTAGTGGCGGGCGCCTGTAGTCCCAGCTACTTGGGAGGCTGAGGCAGGAGAATGGCGTGAACCCGGGAGGCGGAGCTTGCAGTGAGCCGAGATCCTGCCACTGCACTCCAGCCTGGGCGACAGAGCGAGACTCCGTCTCAAAAAAAAAAAAAAAAAAAAAA	AluYa5	no	TCTGTAGAGGAGGGTGAGGAA	GGCTTAGGCGTTCCATACAA	plus strand	sense	-0.0362077	0.0544458	no	.	.	.	.	.	.	.	.	.	.	.	.	.	.		Alu-251	ALU_umary_ALU_2504	0.662921	0.337061	0.4145	0.1331
Alu-253	chr6:25529885-25529886	chr6:25529885-25530012	6p22.2	+	98	28	AAGAATAGGCTGCTA	AGAATGGCGTGAACCCGGGAAGCGGAGCTTGCCGTGAGCCGAGATTGCGCCANTGCAGTCCGCAGTCCGGCCTGGGNGACAGAGNGAGACTCNGTTTCCAAAAAAAAAAAAAAAAAAAAAAAAAAAAA	AluYb8	yes	TGCTGAAGAGAAACTGAGGTG	TTAGGTGTGGGTCCTTTTGC	plus strand	sense	0.218212	0.0761272	yes	F	minus strand	0.838543	0.0220911	Platelet counts	rs441460	0.961	1	0.92-1.00	strong	Risk	22139419	9e-18	3.08	NR	Alu-253	DEL_pindel_18577	0.494444	0.38119	0.3738	0.3608
Alu-259	chr14:68377012-68377013	chr14:68377013-68377152	14q24.1	+	110	33	AAATATTT	CTCGGGAGGNTGNGGCAGGAGAATGGNGTGAACCCAGGAGGGGGAGCTTNCAGTGAGCCGAGATCGCGCCNNTNCACTCCAGCNTGGGGGACAGAGNGNGNTTNNNTTTCAAAAAAAAAAAAAAAAAAAAAAAAAAAAAAAAA	AluYc	yes	ATTTTAGCCTTTGGCCCATT	TTGGGCTCACTATTTCATAAGGA	minus strand	antisense	-0.649095	0.080666	no	.	.	.	.	.	.	.	.	.	.	.	.	.	.		Alu-259	DEL_pindel_40614	0.737805	0.253395	0.2048	0.4637
Alu-260	chr6:118626148-118626149	-	6q22.31	-	255	26	AAAGATCTTTGACT	AATCCCAGCACTTTGGGAGGCCGAGGCGGGCGGATCACGAGGTCAGGAGATCGAGACCATCCTGGCTAACAAGGTGAAACCCCGTCTCTACTAAAAATACAAAAAATTAGCCGGGCGTAGTGGCGGGCGCCTGTAGTCCCAGCTACTTGGGAGGCTGAGGCAGGAGAATGGCGTGAACCCGGGAGGCGGAGCTTGCAGTGAGCCGAGATCCCGCCACTGCACTCCAGCCTGGGCGACAGAGCGAGACTCCGTCTCAAAGAAAAAAAAAAAAAAAAAAAAAAA	AluYa5	no	CCAGATGGGTTGATTGTTCTG	ATTTCTATCCCGCTGGGTCT	plus strand	antisense	0.713745	0.0589422	yes	F	minus strand	0.931144	0.0520383	Electrocardiographic conduction measures	rs6906287	0.51	0.944	0.77-0.99	moderate	Risk	23463857	6e-16	0.54	0.451	Alu-260	ALU_umary_ALU_5509	0.622222	0.364617	0.4185	0.4985
Alu-264	chr15:65733471-65733472	-	15q22.31	+	283	31	AAAAGTT	GGCCGGGCGCGGTGGCTCACGCCTGTAATCCCAGCACTTTGGGAGGCCGAGGCGGGCGGATCACGAGGTCAAGAGATCGAGACCATCCCGGCTAAAACGGTGAAACCCCGTCTCTACTAAAAATACAAAAAAATTAGCCGGGCGTAGTGGCGGGCGCCTGTAGTCCCAGCTACTTGGGAGGCTGAGGCAGGANAATGGCGTGAACCCGGGNGGCGGAGCTTGCAGTGAGCCGAGATCCCGCCACTGCACTCCAGCCTGGGCGACAGANCGAGNCTCCGTCTCANNNANAAANAAAAAAAAANANNNNAAAAA	AluYa5	no	CCCCAGTGTGCCTGTTTATC	AAGCAGATGAACCCCTCTGA	plus strand	sense	0.819581	0.050098	no	.	.	.	.	.	.	.	.	.	.	.	.	.	.		Alu-264	.	.	.	.	.
Alu-268	chr1:93167520-93167521	-	1p22.1	-	288	26	AAAATAACAT	NCAGTAGNCCGGGNGGGGTGGNTCACGCCTGTAATCCCAGCACTTTGGGAGGCCGAGGCGGGCGGATCANGAGGTCAGGAGATNGAGACCATCCCGGTTAAAACGGTGAAACCCCGTTTTTANTAAAAAATACAAAAAATTAGCCGGGCGTAGTGGCGGGCGCCTGTGGTCCCAGTTACTTGGGAGGCTGAGGCAGGAGAATGGCGTGAACCCGGGAGGCGGAGCTTGCAGTGAGCCGAGATCCCGCCACTGCACTCCAGCCTGGGGGACAGAGCGAGACTCCGTTTCAAAAAAAAAAAAAAAAAAAAAAAAAA	AluYa5	no	TTTAGGGCATGCAGTGAGGT	GCAAGCAAGAGCTTTTCTCAA	plus strand	antisense	0.107326	0.03724	no	.	.	.	.	.	.	.	.	.	.	.	.	.	.		Alu-268	ALU_umary_ALU_356	.	0.447284	0.4433	0.4539
Alu-271	chr12:28163331-28163332	-	12p11.22	+	292	25	AAAAAGATGTGG	GCCGGGCGCGGTGGCTCACGCCTGTAATCCCAGCACTTTGGGAGGCCGAGGCGGGTGGATCATGAGGTCAGGAGATCGAGACCATCCTGGCTAACAAGGTGAAACCCCGTCTCTACTAAAAAAAATACAAAAAAAATTAGCCGGGCGCGGTGGCGGGCGCCTGTAGTCCCAGCTACTCGGGAGGCTGANGCAGGAGAATGGCGTGAACCCGGGAAGCGGAGCTTGCAGTGAGCCGAGATTGCGCCACTGCAGTCCGCAGTCCGGCCTNNCGACAGAGCGAGACTCCGTCTCNAAAAAAANAAAAAAAAAAAAAAAA	AluYb8	no	GGGTTCCCAGTGACTTCCAT	TTGTGTTTGTGTCTCGCCTC	minus strand	antisense	-1.11236	0.0661001	yes	F	plus strand	-0.63384	0.00615438	Breast cancer	rs10771399	0.918	1	0.83-1.00	strong	Protective	23535729	8e-31	1.16	0.88	Alu-271	ALU_umary_ALU_9104	0.141176	0.0670927	0.0795	0.0038
Alu-272	chr12:40673009-40673010	-	12q12	-	278	24	AAAAAGTAAACTATTGGC	CGGGCGCGGTGGCTCACGCCTGTAATCCCAGCACTTTGGGAGGCCGAGGCGGGCGGATCACGAGGTCAGGAGATCGAGACCATTCTGGCTAACACGGTGAAACCCCGTCTCTACTAAAAATACAAAAAATTAGCCGGGCGTGGTAGCGGGCGCCTGTAGTCCCAGCTACTCGGGAGGCTGAGGCAGGAGAATGGCGTGAACCCGGGAGGCAGAGCTTGCAGTGAGCCGAGATCGCGCCACTGCACTCCAGCCTGGGCGACAGAGCGAGACTCCGTCTCNNNNNNNNNNNNNNNNNNNANNNN	AluY	no	CAAACCTCCAAACAAAATTAAGA	GCATGCAAAAGATGCACAGT	minus strand	sense	-0.262852	0.0279235	no	.	.	.	.	.	.	.	.	.	.	.	.	.	.		Alu-272	ALU_umary_ALU_9158	0.52809	0.306709	0.4016	0.2277
Alu-274	chr2:218265091-218265092	-	2q35	+	289	16	AAGACTGGTGG	GGCCGGGCGCGGTGGCTCACGCCTGTAATCCCAGCACTTTGGGAGGCCGAGGCGGGTGGATCATGAGGTCAGGAGATCGAGACCATCCTGGCTAACAAGGTGAAACCCCGTCTCTACTAAAAATACAAAAAATTAGCCGGGCGCGGTGGCGGGCGCCTGTAGTCCCAGCTACTGGGGAGGCTGAGGCAGGAGAATGGCGTTGAACCCGGGAAGCGGAGCTTGCAGTGAGCCGAGATTGCGCCACTGCAGTCCGCAGTCCAGCCTGGGCGACAGAGCGAGACTCCGTCTCAAAAAAAAAAAAAAAA	AluYb9	no	TGTGACATGTTGTGAAAAATACAC	ATTGGGGTGAGAAGGAGCTT	minus strand	antisense	-0.919214	0.124304	yes	F	plus strand	0.0620669	0.113376	Breast cancer	rs16857609	0.953	1	0.90-1.00	strong	Risk	23535729	1e-15	1.08	0.26	Alu-274	ALU_umary_ALU_1987	0.320225	0.284545	0.2266	0.1997
Alu-276	chr1:72639005-72639006	-	1p31.1	-	281	20	GAAAATAAGATTGCT	GGCCGGGCGCGGTGGCTCACNCNGTAATCCCAGCACTTNGGGAGGCCGAGGCGGGCGGATCACGAGGTCAGGAGATCGAGACCATCCCGGNTAAAACGGTGAAACCCCGTCTNTACTAAAAATACAAAAAATTAGCCGGGCGTAGTGGCGGGCGCCTGTAGTCCCAGCTACTTGGGAGGCTGAGGCAGGAGAATGGCGTGAACCCGGGAGGCGGAGCTTGCAGTGAGCCGAGATCCCGCCACTGCACTCCAGCCTGGGCGACAGAGCGAGACTCCGTCTCAAAAAAAAAAAAAAAAAAAAA	AluYa5	no	ACCTTGTGCCCACCTGAATA	TGAGGAGGGAAAGTCTAGTTCATT	minus strand	sense	-0.0875026	0.0745176	yes	F	plus strand	0.0916367	0.017026	.	.	.	.	.	.	.	.	.	.		Alu-276	ALU_umary_ALU_244	0.53125	0.139776	0.1372	0.0809
Alu-283	chr12:122319850-122319851	-	12q24.31	-	280	43	AAAATACGAAAATTAG	GGTTGGGCGCGGTGGCTCACGCCTGTAATCCCAGCACTTTGGGAGGCCGAGGCGGGCGGATTACGAGGTCAGGAGATCGAGACCATCCCGGCTAAAACGGTGAAACCCCGTCTCTACTAAAAATACAAAAAATTAGCCGGGCGTAGTGGCGGGCGCCTGTAGTCCCAGCTACTTGGGAGGCTGAGGCGGGAGAATGGCGTGAACCCGGGAGGCGGAGCTTGCAGTGAGCCGAGATCCCGCCACTGCACTCCAGCCTGGGCGACAGAGCGAGACTCCGTCTCNNAAAAAAAAAAAAAAAAAAAAAAAAAAAAAAAAAAAAAAAA	AluYa5	no	GAGTTGGCCCCCTAAAAGTT	GAGGAGAGACAAGTGGGGGTA	minus strand	sense	-0.0372336	0.0434819	yes	F	plus strand	-0.0465824	0.248568	.	.	.	.	.	.	.	.	.	.		Alu-283	.	0.3	.	.	.
Alu-285	chr7:98754606-98754607	-	7q22.1	-	287	30	AAATCTTTCAGAATATAG	GCCGGGCGCGGTGGCTCACGCCTGTAATCCCAGCACTTTGGGAGGCCGAGGCGGGTGGATCATGAGGTCAGGAGATCGAGACCATCCTGGCTAACAAGGTGAAACCCCGTCTCTACTAAAAATACAAAAAATTAGCCGGGCGCGGTGGCGGGCGCCTGTAGTCCCAGCTACTGGGGAGGCTGAGGCAGGAGAATGGCGTGAACCCGGGAAGCGGAGCTTGCAGTGAGCCGAGATTGCGCCACTGCAGTCCACAGTCCGGCCTGGGCGACAGAGCGAGACTCCGTCTCAANAAAAAAAAAAAAAAAAAAAAAAA	AluYb9	no	TCAATGAACCCTTTCAGCCTA	CAAAACAACCATTTCCCAGAA	minus strand	sense	-0.0682628	0.0871423	yes	F	plus strand	0.152501	0.0833411	Ulcerative colitis	rs7809799	1	1	0.72-1.00	strong	Risk	20228798	9e-11	1.56	0.04	Alu-285	ALU_umary_ALU_6235	0.0511364	0.00399361	0.007	0
Alu-298	chr15:43856967-43856968	-	15q15.3	-	281	24	GATGGCACTGGCCT	GCTGGGCGCAATGGCTCACGCCTGTAATCCCAGCACTTTGGGAGGCCAAGGCAGGCAGATCACTAGGTCAGGAGTTTAAGAACAGCCTGGCCAACGTGGTGAAACCCCGTCTNTACTAAAAATACAAAAATTAGCTGGGCGTCCTGGCGTGCACCTGTATTCCCAGCTACTTGGGAGGCTGAGGCAGCAGAATCGCTTGAACCCAGGAGGCGGAGACTGCAGTGAGCTGAGATTGTGCCACTGCATTGTCCAGCCTGGGTGACAGAGTGAGACTCAGTTTCAAAAAAAAAAAAAAAAAAAAAAAG	AluSg	no	TAGTGGCCTGTTGTTTCTGC	CCTAAACCCAATTTGCTGGA	plus strand	antisense	0.137864	0.00498345	no	.	.	.	.	.	.	.	.	.	.	.	.	.	.		Alu-298	.	.	.	.	.
Alu-308	chr1:66079154-66079155	chr1:66079155-66079465	1p31.3	+	288	23	n/a	GGCCGGGCGCGGTGGCTCACGCCTGTAATCCCAGCACTTTGGGAGGCCGAGGCGGGTGGATCACGAGGTCAGGAGATCGAGACCATCCTGGCTAACAAGGTGAAACCCCGTCTNTACTAAAAATACAAAAAATTAGCCGGGNGCGGTGGCGGGCGCCTGTAGTCCCAGNTACTCGGGAGGNTGAGGCAGGAGAATGGCGTGAACCCAGGAAGCGGAGCTTGCAGTGAGCCGAGATTGCGCCATTGCAGTCCGCAGTCCGGCCTGGGCAACAGAGCGAGATTCCGTTTCAAAAAAAAAAAAAAAAAAAAAAA	AluYb8	yes	TTTTTGAGTACTGGTAAGTTCGAC	TTGCATCATGTGGTTGGTAA	minus strand	antisense	-0.276917	0.092202	no	.	.	.	.	.	.	.	.	.	.	.	.	.	.		Alu-308	.	0.711765	.	.	.
Alu-311	chr11:47806640-47806641	-	11p11.2	-	261	13	AAGAATCTGAAACTC	GGCCGGGCGCGGTGGCTCACGCCTGTAATCCCAGCACTTTGGGAGGCAGAGGCGGGCGGATCATGAGGTCAGGAGATCGAGACCATCCTGGCTAACACAGTGAAACCCCGCCTCTACTAAAAATACAAAAAATTAGCCGGGCGTCGTNNGGGCGCCTGTAGTCCCAGCTACTCGGGAGGCTGAGGCAGGAGAATGGCGTGAACCCGGGAGGCGGAGCTTGCAGTGAGCCGAGATCCCGCCGACAGAGCGAGACTCCGTCTCAAAAAAAAAAAAA	AluYh3a3	no	TCCCCATAAGTCACATTAGCC	CCAGAATGATAAAGAGTGGGTTC	minus strand	sense	1.13164	0.0358451	yes	F	plus strand	0.976064	0.0822024	Body mass index	rs3817334	0.622	1	0.86-1.00	moderate	Protective	20935630	2e-12	0.06	0.41	Alu-311	ALU_umary_ALU_8566	0.459302	0.205471	0.2674	0.0469
Alu-323	chr3:52709849-52709850	chr3:52709850-52710159	3p21.1	+	281	36	GAATGAAGCGGG	GGCCGGGCGCGGTGGCTCACGCCTGTAATCCCAGCACTTTGGGAGGCCGAGGCGGGCGGATCACGAGGTCAGGAGATCGAGACCATCCCGGCTAAAATGGTGAAACCCCGTCTCTACTAAAAATACAAAAAATTAGCCGGGCGTAGTGGCGGGCGCCTGTAGTCCCAGCTACTTGGGAGGCTGAGGCGGGAGAATGGCGTGAACCCGGGAGGCGGAGCTTGCAGTGAGCCGAGATCCCGCCACTGCACTCCAGCCTGGGCGACAGAGCGAGACTCCGTCTCNNAAAAAAAAAAAAAAAAAAAAAAAAAAAAAAAAAT	AluYa5	yes	TTCCACAGTGAACAAGGTGT	GGTCCCTCCCACAACATGT	minus strand	antisense	0.554989	0.0601906	yes	F	plus strand	0.419394	0.0543784	Osteoarthritis	rs11177	0.914	1	0.90-1.00	strong	Protective	22763110	5e-09	1.09	0.38	Alu-323	DEL_pindel_8035	0.640449	0.384784	0.3777	0.4599
Alu-328	chr20:33621666-33621667	chr20:33621667-33621981	20q11.22	+	288	23	AAAAGAGTAAA	GGCCGGGCGCGGTGGCTCACGCCTGTAATCCCAGCACTTTGGGAGGCCGAGGCGGGTGGATCATGAGGTCAGGAGATCGAGACCATCCTGGCTAACAAGGTGAAACCCCGTCTCTACTAAAAATACAAAAAATTAGCCGGGCGCGGTGGCGGGCGCCTGTAGTCCCAGCTACTCGGGAGGCTGAGGCAGGAGAATGGCGTGAACCCGGGAAGCGGAGCTTGCAGTGAGCCGAGATTGCGCCACTGCAGTCCGCAGTCCGACCTGGGCGACAGAGCGAGACTCCGTCTCAAAAAAAAAAAAAAAAAAAAAAA	AluYb8	yes	GCCTGTAGATCACCCTGTTCTTAATTAA	CCTGCTCTGAGAATTTGCCC	plus strand	sense	1.51565	0.308567	no	.	.	.	.	.	.	.	.	.	.	.	.	.	.		Alu-328	.	0.297753	.	.	.
Alu-330	chr4:9952307-9952308	chr4:9952308-9952546	4p16.1	+	207	22	AAAGAAAACAGTATGGAGA	GATCGAGACCATCCTGGCTAACACGGTGAAACCCTGTCTCTACTAAAAATACAAAAAATTAGCCGGGCGTGGTAGCGGGCGCCTGTAGTCTCAGCTACTCGGGAGGCTGAGGCAGGAGAATGGCGTGAACCCGGGAGGCGGAGCTTGCAGTGAGCCGAGATCGCGCCACTGCACGCCAGCCTGGGCGACAGAGCGAGACTCCGTCTCAAAAAAAAAAAAAAAAAAAAAAAAA	AluY	yes	GATGTCCTCTGCCTTGCTTG	ACTCCTCAAGCCTTCCTAAGT	plus strand	sense	0.883516	0.0692991	yes	f	minus strand	0.470493	0.0441897	Uric acid levels	rs3775948	0.495	1	0.84-1.00	moderate	Risk	21294900	1e-09	0.18	0.66	Alu-330	.	0.517045	.	.	.
Alu-350	chr5:158717157-158717158	-	5q33.3	-	281	32	AAAATAAATCAGGTTC	GGCCGGGCGCGGTGGCTCACGCCTGTAATCCCAGCACTTTGGGAGGCCGAGGCGGGCGGATCACGAGGTCAGGAGATCGAGACCATCCCGGCTAAAACGGTGAAACCCCGTCTCTACTAAAAATACAAAAAATTAGCCGGGCGTAGTGGCGGGCGCCTGTAGTCCCAGCTACTTGGGAGGCTGAGGCGGGAGAATGGCGTGAACCCGGGAGGCGGAGCTTGCAGTGAGCCGAGATCCCGCCACTGCACTCCAGCCTGGGCGACAGAGCGAGACTCCGTCTCAAAAAAAAAAAAAAATAAATAAAAATAAAAAAT	AluYa5	no	GGCAGATTCAGGTAAGAGTGG	GGCATAGGTGGGTGAGAAAT	plus strand	antisense	-0.407681	0.108275	yes	F	minus strand	0.400949	0.0533281	.	.	.	.	.	.	.	.	.	.		Alu-350	ALU_umary_ALU_4807	0.488889	0.301518	0.3907	0.1657
Alu-351	chr4:112698424-112698425	-	4q25	-	282	41	ATCTTTT	GGCCGGGCGCGGTGGCTCACGCCTGTAATCCCAGCACTTTGGGAGGCCGAGGCGGGCGGATCACGAGGTCAGGAGATCGAGACCATCCCGGCTAAAACGGTGAAACCCCGTCTCTACTAAAAATACAAAAAAATTAGCCGGGCGTAGTGGCGGGCGCCTGTAGTCCCAGCTACTTGGGAGGCTGAGGCAGGAGAATGGCGTGAACCCGGGAGGCGGAGCTTGCAGTGAGCCGAGATCCCGCCACTGCACTCCAGCCTGGGCGACAGAGCGAGACTCCGTCTCNNAAAAAAAAAAAAAAAAAAAAAAAAAAAAAAAAAAAAAAAA	AluYa5	no	TCTTTGCGTTCTCCCTTGAT	AACATTACCGCCTGAACAAAA	plus strand	antisense	1.54684	0.160124	yes	F	minus strand	1.09602	0.0417962	.	.	.	.	.	.	.	.	.	.		Alu-351	ALU_umary_ALU_3601	0.405556	0.262979	0.2247	0.2405
Alu-353	chr11:88908937-88908938	-	11q14.3	-	285	25	AGAAAGTCTTCATCA	GGCCGGGCGCGGTGGCTCACGCCTGTAATCCCAGCACTTTGGGAGGCCGAGGCGGGCGGATCACGAGGTCAGGAGATCGAGACCATCCCGGCTAAAAAAACGGTGAAACCCCGTCTCTACTAAAAATACAAAAAAATTAGCCGGGCGTAGTGGCGGGCGCCTGTAGTCCCAGCTACTTGGGAGGCTGAGGCAGGAGAATGGCGTGAACCCGGGAGGCGGAGCTTGCAGTGAGCCGAGATCCCGCCACTGCACTCCAGCCTGGGTGATAGAGCGAGACTCCGTCTCAAAAAAAAAAAAAAAAAAAAAAAAAA	AluYa5	no	GAAAATCAACCCTGTAAAGGAAA	TGTTCTCGAAGACAGAATTCAA	plus strand	antisense	0.474058	0.0806508	yes	F	minus strand	0.632516	0.170143	Melanoma	rs1393350	0.408	1	0.78-1.00	moderate	Protective	19578364	2e-14	1.29	0.27	Alu-353	ALU_umary_ALU_8717	0.601124	0.380791	0.4264	0.1952
Alu-354	chr11:14500010-14500011	-	11p15.2	-	283	20	AAAATAATACATTCCTG	GCCGGGCGCGGTGGCTCACGCCTGTAATCCCAGCACTTTGGGAGGCCGAGGCGGGCGGATCACGAGGTCAGCAGATCGAGACCATCCCGGCTAAGACGGTGAAACCCCGTCTCTACTAAAAATACAAAAAAAAATTAGCCGGGCGTAGTGGCGGGCGCCTGTAGTCCCAGCTACTTGGGAGGCTGAGGCAGGAGAATGGCGTGAACCCGGGAGGCGGAGCTTGCAGTGAGCCGAGATCCCGCCACTGCACTCCAGCCTGGGCGACAGAGCGAGACTCCGTCTCNNNAAAAAAAAAAAAAAAAA	AluYa5	no	TCCATTTAGGACACAGTGAAGG	GGGGAAAGATGACTAAGGACTTT	minus strand	sense	0.41363	0.027394	yes	F	plus strand	0.330711	0.0951929	.	.	.	.	.	.	.	.	.	.		Alu-354	ALU_umary_ALU_8392	0.35	0.136182	0.1759	0.0303
Alu-355	chr1:170603451-170603452	-	1q24.3	+	270	26	AAAAAAAGTATGAAATA	GGCCGGGCGCGGTGGCTCACCCCTGTAATCCCAGCACTTTGGGAGGCCGAGGCGGGCGGATCACGAGGTCAGGAGATGGAGACCCCGGTGAAACCCCGTTTTTATTAAAAATACAAAAAAATTACCCGGGGGCAGTGGGGGGCGCCTGTAGTCCCAGTTACTGGGGGGGNTGGGGCAGGAGAATGGCGGGAACCCGGAAGGGGGAGCTTGCAGTGAGGGGAGATCGCGCCCCTGCACTCCCGCCTGGGGGACAGAACGAGATTCCGTTTCAAAAAAAAAAAAAAAAAAAAAAAAAAA	AluYd8	no	GGTAAGCCAAATGCCATCAG	CGCATGTAAGATGTGCCAAA	plus strand	sense	1.42558	0.0527028	yes	F	minus strand	1.71198	0.132531	Atrial fibrillation	rs3903239	0.406	1	0.83-1.00	moderate	Protective	22544366	8e-14	1.14	0.45	Alu-355	ALU_umary_ALU_585	0.35	0.200479	0.2028	0.146
Alu-357	chr1:169160349-169160350	chr1:169160040-169160349	1q24.2	-	281	24	AGAAACAGTTCACTTGC	GGCCGGGCGCGGTGGCTCACNCCTGTAATCCCAGCACTTTGGGAGGCCGAGGGGGGTGGATCACGAGGTCAGGAGATCGAGACCATCCCGGNTAAAACGGTGAAACCCTGTTTTTACTAAAAATACAAAAAATTACCCGGGGGTAGTGGCGGGCGCCTGTAGTCCCAGTTACTCGGGAGGCTGAGGCAGGAGAATGGCGTGAACCCGGGAGGGGGAGCTTGCAGTGAGCCGAGATCCCGCCACTGCACTCCAGCCTGGGGGACAGAGGGAGATTCCGTTTCAAAAAAAAAAAAAAAAAAAAAAAAAAAAA	AluYa5	yes	GTCTGGGGAGAGAGGCAATA	CCTTGATTGCCAACACTGAA	plus strand	antisense	0.881654	0.110926	no	.	.	.	.	.	.	.	.	.	.	.	.	.	.		Alu-357	.	0.713483	.	.	.
Alu-360	chr6:43895474-43895475	-	6p21.1	-	283	21	AAAGATTGTCTGG	GGCCGGGCGCGGTGGCTCACGCCTGTAATCCCAGCACTTTGGGAGGCCGAGGCGGGCGGATCACGAGGTCAGGAGATCGAGACCATCCCGGCTAAAACGGTGAAACCCCGTCTCTACTAAAAAATACAAAAAATTAGCCGGGCGTAGTGGCGGGCGCCTGTAGTCCCAGCTACTTGGGAGGCTGAGGCAGGAGAATGGCGTGAACCCGGGAGGCGGAGCTTGCAGTGAGCCGAGATCCCGCCACTGCACTCCAGCCCGGGCGACAGAGAGAGACTCCGTCTCNAAAAAAAAAAAAAAAAAAA	AluYa5	no	ATTGAGACTCGGCAAACAGG	AGGGCTGCTAAGAAAACATTG	plus strand	antisense	0.267533	0.0643861	yes	F	minus strand	0.794636	0.080839	Vascular endothelial growth factor levels	rs9472155	0.945	1	0.89-1.00	strong	Protective	21757650	2e-26	NR	0.22	Alu-360	ALU_umary_ALU_5120	0.772222	0.458466	0.5596	0.2216
Alu-363	chr2:232279813-232279814	-	2q37.1	+	272	26	AAAAGCAGAGAGCT	TCACGCCTGTAATCCCAGCACTTTGGGAGGCCGAGGCGGGTGGATCATGAGGTCAAGAGATCGAGACCATCCTGGCTGACAAGGTGAAACCCCGTCTCTACTAAAAATACAAAAAATTAGCCGGGCGCGGTGGCGGGCGCCTGTGGTCCCAGCTACTCGGGAGGCTGAGGCAGGAGAATGGCGTGAACCCGGGAAGCGGAGCTTGCAGTGAGCCGAGATTGCGCCACTGCAGTCCGCAGTCCGGCCTGGGCGACAGAGCGAGACTCCGTCTCNAAAAAAAAAAAAAAAAAAAAA	AluYb8	no	GAGGGTGTCTGATAAAAATGTACC	TGAAGTTCCCATTTCCTTGC	minus strand	antisense	2.15746	0.367933	no	.	.	.	.	.	.	.	.	.	.	.	.	.	.		Alu-363	ALU_umary_ALU_2046	0.444444	0.0878594	0.1014	0.0779
Alu-367	chr8:128119606-128119607	-	8q24.1	-	288	13	AAAAGCGATGTCCA	GGCCGGGCGCGGTGGCTCACGCCTGTAATCCCAGCACTTTGGGAGGCCGAGGCGGGTGGATCATGAGGTCACGAGATCGAGACCATCCTGGCTAACAAGGTGAAACCCCGTCTCTACTAAAAATACAAAAAATTAGCCGGGCGCGGTGGCGGGCGCCTGTAGTCCCAGCTACTCGGGAGGCTGANGCAGGAGAATGGCGTGAACCCGGGAAGCGGAGCTTGCAGTGAGCCGAGATTGCGCCACTGCAGTCCGCAGTCCGGCCTGGGCGACAGAGCGAGACTCCGTCTCAAAAAAAAAAA	AluYb8	no	CACAAAGCTAAATTATGCCAGCTA	CTGCTTCCCTTGTTCCAAAG	plus strand	antisense	1.41629	0.196147	yes	F	minus strand	1.22508	0.219883	Prostate cancer	rs10505483	1	1	0.59-1.00	strong	Risk	22923026	7e-15	1.73	NR	Alu-367	ALU_umary_ALU_7140	0.0222222	0.0790735	0.0179	0.1785
Alu-371	chr12:107122075-107122076	-	12q23.3	-	281	21	AATACATGAGG	GGCCGGGCGCGGTGGCTCACGCCTGTAATCCCAGCACTTTGGGAGGCCGAGGCGGGCGGATCACGAGGTCAGGAGATCGAGACCATCCCGGCTAAAATGGTGAAACCCCGTCTCTACTAAAAATACAAAAAATTAGCCGGGCGTAGTGGCGGGCGCCTGTAGTCCCAGCTACTTGGGAGGCTGAGGCAGGAGAATGGCGTGAACCCGGGAGGCGGAGCTTGCAGTGAGCCGAGATCCCGCCACTGCACTCCAGCCTGGGCGACAGAGCGAGACTCCGTCTCNAAANNNNAAAAAAAAAAAA	AluYa5	no	AAAATTGGTGGTGATTACACTGG	AGAGAGGCAGTTACAGCGAAC	plus strand	antisense	-0.40529	0.276733	yes	F	minus strand	-0.373067	0.138883	.	.	.	.	.	.	.	.	.	.		Alu-371	ALU_umary_ALU_9499	0.138889	0.0890575	0.0924	0.1067
Alu-372	chr1:228959918-228959919	-	1q42.13	-	280	31	AAAAACTATACAAAG	GCCGGGCGCGGTGGCTCACGCCTGTAATCCCAGCACTTTGGGAGGCCGAGGCGGGCGGATCACGAGGTCAGGAGATCGAGACCATCCTGGCTAACACGGTGAAACCCCGTCTCTACTAAAAATACAAAAAATTAGCCGGGCGTAGTGGCGGGCGCCTGTAGTCCCAGCTACTCGGGAGGCTGAGGCAGGAGAATGGCGTGAACCCGGGAGGCGGAGCTTGCAGTGAGCCGAGATCGCGCCACTGCACTCCAGCCTGGGCGACAGAGCGAGACTCCGTCTCNANNNNAAAANNNNNNNNNNNNNNNNNN	AluY	no	TTTTGGGGTCAATGTTTGTG	TTGAAACATCAGGAAGGATGAA	plus strand	antisense	-0.283712	0.13348	yes	F	minus strand	-0.659798	0.247236	Basal cell carcinoma	rs801114	0.608	0.901	0.74-0.97	moderate	Risk	18849993	6e-12	1.28	0.33	Alu-372	ALU_umary_ALU_845	0.427778	0.264377	0.2893	0.354
Alu-376	chr3:128395208-128395209	-	3q21.3	-	280	18	AAGAGTCCTTTATT	GGCCGGGCGCGGTGGCTCACGCCTGTAATCCCAGCACTTTGGGAGGCCGAGGCGGGCGGATCACGAGGTCAGGAGATCGAGACCATCCTGGCTAACACGGTGAAACCCCGTCTNTACTAAAAATACAAAAAATTAGCCGGGCGAGGTGGCGGGCGCCTGTAGTCCCAGCTACTCGGGAGGCTGAGGCAGGAGAATGGCGTGAACCCCAGGGGGCGGAGCCTGCAGTGAGCCGAGATTGCGCCACTGCACTCCAGCCTGGGCGACAGCGAGACTCCGTCTCAAAAAAAAAAAAAA	AluYe5	no	TTGAGTTCCTGTCCGGCATA	GATATATCCAGGCCCGTGTG	minus strand	sense	1.02742	0.0919678	yes	F	plus strand	0.293877	0.0880261	Monocyte count	rs2712381	0.877	1	0.89-1.00	strong	Protective	23314186	2e-16	0.23	0.4	Alu-376	ALU_umary_ALU_2697	0.633721	0.377995	0.4026	0.3389
Alu-378	chr3:128043091-128043092	-	3q21.3	+	281	15	AAACATGA	GGCCGGGCGCGGTGGCTCACGCCTGTAATCCCAGCACTTTGGGAGGCCGAGGCGGGCGGATCACGAGGTCAGGAGATCGAGACCATCCCGGCTAAAACGGTGAAACCCCGTCTCTACTAAAAATACAAAAAATTAGCCGGGCGTAGTGGCGGGCGCCTGTAGTCCCAGCTACTTGGGAGGCTGAGGCAGGAGAATGGCGTGAACCCGGGAGGCGGAGCTTGCAGTGAGCCGAGATCGTGCCACTGCACTCCAGCCTGGGCGACAGAGCGAGACTCCGTCTCAAAAAAAAAAAAAAA	AluYa5	no	CATGGACACGGACCTCTCAC	GGCCAGGAAGTCCTGAAAG	minus strand	antisense	0.727788	0.0449188	no	.	.	.	.	.	.	.	.	.	.	.	.	.	.		Alu-378	ALU_umary_ALU_2695	.	0.0119808	0.001	0.0416
Alu-383	chr1:158712047-158712048	chr1:158712047-158712352	1q23.1	+	280	25	GGAAAAGTAGGGCAAGG	GGCCGGGCGCGGTGGCTCACGCCTGTAATCCCAGCACTTTGGGAGGCNGAGGCGGGCGGATCANGAGGTCAGGAGATCGAGACCATCCCGGTTAAAACGGTGAAACCCCGTTTTTACTAAAAATACAAAAAATTAGCCGGGGGTAGTGGCGCGCGCCTGTAGTCCCAGCTACTTGGGAGGCTGAGGCAGGAGAATGGGGTGAACCCGGGAGGGGGAGCTTGCAGTGAGCCGAGATCCCGCCACTGCACTCCAGCCTGGGGGACAGAGGGAGATTCCGTTTCAAAAAAAAAAAAAAAAAAAAAAAAA	AluYa5	yes	TGAAGAGGTGTGTGTGAACTCC	GCAGCCCACATTGCTATTTT	minus strand	antisense	0.499256	0.0448561	no	.	.	.	.	.	.	.	.	.	.	.	.	.	.		Alu-383	.	0.583333	.	.	.
Alu-385	chr2:85772849-85772850	-	2p11.2	+	288	26	AAAAACCGCTAAAA	GGNCCGGGCGCGGNGGCTCACNCCTGTAATCCCAGCACTTTGGGAGGCCGAGGCGGGTGGATCATGAGGTCAGGAGATCGAGACCATCCTGGCTAACAAGGTGAAACCCCGTNTTTACTAAAAATACAAAAAATTANCCGGGCGNGGNGGCGGGTGCCTGTAGTCCCAGNTNNTNGGGAGGNTGAGGCAGGAGAATGGCGTGAACCCGGGAAGGGGAGCTTNCAGTGAGCCGAGATTGCGCCANTGCAGTCCGCATTCCGGCCTGGGGGACAGAGGGGGATTCCTTTTCAAAAAAAAAAAAAAAAAAAAAAAAAAAAAA	AluYb9	no	ACTCATTTGTTAAAGTGCTTTGG	GTGTGGTCTGCGGATTTTCT	plus strand	sense	0.263255	0.0208302	yes	F	minus strand	0.519161	0.0682659	.	.	.	.	.	.	.	.	.	.		Alu-385	ALU_umary_ALU_1357	.	0.0131789	0	0.0492
Alu-386	chr1:158629699-158629700	chr1:158629386-158629699	1q23.1	-	288	41	AATAATGCTAAGACTA	GGCCGGGCGCGGTGGCTCACGCCTGTAATCCCAGCACTTTGGGAGGCCGAGGCGAGTGGATCATGAGGTCAGGAGATCGAGACCATCCTGGCTAACAAGGTGAAACCCCGTCTCTACTAAAAATACAAAAAATTAGCCGGGCGCGGTGGCGGGCGCCTGTAGTCCCAGCTACTCGGGAGGCTGAGGCAGGAGAATGGCGTGAACCCGGGAAGCGGAGCTTGCAGTGAGCCGAGATTGCGCCACTGCAGTCCGCAGTCCGGCCTGGGCGACAGAGCGAGACTCCGTCTCAAAAAAAAAAAAAAAAAAAAAAAAAAAAAAAAAAAAAAAAAAA	AluYb8	yes	CAGTGACATCATCACCCATCTC	TGCCATTGTGATTTGGAGTC	minus strand	sense	0.214915	0.110921	yes	R	plus strand	0.699907	0.056775	Red blood cell traits	rs857684	0.811	0.901	0.77-0.96	strong	Risk	23222517	4e-16	0.01	0.74	Alu-386	.	0.694444	.	.	.
Alu-407	chr1:196761370-196761371	-	1q31.3	+	288	26	AAGAAATTTATTT	GGCCGGGCGCGGTGGCTCACGCCTGTAGTCCCAGCACTTTGGGAGGCCGAGGCGGGTGGATCATGAGGTCAGGAGATCGAGACCATCCTGGCTAACAAGGTGAAACCCCGTCTCTACTAAAAATACAAAAAATTAGCCGGGCGCGGTGGCGGGCGCCTGTAGTCCCAGCTACTCGGGAGGCTGAGGCAGGAGAATGGCTTGAACCCGGGAGGCGGAGCTTGCAGTGAGCCGAGATTCCGCCACTGCAGTCCGCAGTCCGGCCTGGGCGACAGAGCGAGACTCCGTCTCAAAAAAAAAAAAAAAAAAAAAAAAAAA	AluYb8	no	TTCAAGCACAGAATTCTAGGGA	TCTCTTATGCCCACAATGTAGA	plus strand	sense	0.01666	0.103396	no	.	.	.	.	Meningococcal disease	rs426736	1	1	0.89-1.00	strong	Protective	20694013	5e-13	1.59	0.84	Alu-407	ALU_umary_ALU_716	0.15	0.16853	0.1133	0.1505
Alu-411	chr1:196779191-196779192	-	1q31.3	-	98	19	AAGAATGAAGCC	ACGCAGGAGAATGGCGTGAACCCGGGAGGCGGAGCTTGCAGTGAGCCGAGATCCCGCCACTGCACTCCAGCCTGGGCGACAGAGCGAGACTCCGTCTCAAAAAAAAAAAAAAAAAAA	AluYa8	no	GGGGCCAGATAAGGGATAAA	CCAGGTGGTAAGAATGTTGG	minus strand	sense	0.246079	0.0923291	no	.	.	.	.	Meningococcal disease	rs426736	0.868	1	0.85-1.00	strong	Protective	20694013	5e-13	1.59	0.84	Alu-411	ALU_umary_ALU_717	0.186047	0.165335	0.1014	0.2035
Alu-424	chr10:69994906-69994907	-	10q21.3	+	288	24	AGAATTAGCAATTTTG	GGCCGGGCGCGGTGGCTCACGCCTGTAATCCCAGCACTTTGGGAGGNCGAGGCGGGTGGATCATGAGGTCAGGAGATCGAGACCATCCTGGCTAACAAGGTGAAACCCCGTCTCTACTAAAAATACAAAAAATTAGCCGGGCGTGGTGGCGGGCGCCTGTAGTCCCAGCTACTCGGGAGGCTGAGGCAGGAGAATGGCGTGAACCCGGGAAGCGGAGCTTGCAGTGAGCCGAGATTGCGCCACTGCAGTCCGCAGTCCGACCTGGGCGACAGAGCGAGACTCCGTCTCAAAAAAAAAAAAAAAAAAAAAAAAA	AluYb9	no	TGGACACTTTTTCTAACCTGCTC	GGCCAACCACCAGATGTATG	minus strand	antisense	0.8766	0.0366726	yes	F	plus strand	0.849697	0.0892159	Optic disc parameters	rs1900004	0.643	1	0.79-1.00	moderate	Protective	20548946	3e-35	0.07	0.22	Alu-424	ALU_umary_ALU_8067	0.815789	0.355232	0.3569	0.385
Alu-449	chr12:28417298-28417299	-	12p11.22	-	280	22	AAAAAAAATTATT	GGCCGGGCGCGGTGGCTCACGCCTGTAATCCCAGCACTTTGGGAGGCCGAGGCGGGTGGATCATGAGGTCAGGAGATCGAGACCATCCTGGCTAACAAGGTGAAACCCCGTCTCTACTAAAAATACAAAAAATTAGCCGGGCGCGGTGGCGGGCGCCTGTAGTCCCAGCTACTCGGGAGGCTGAGGCAGGAGAATGGCGTGAACCCGGGAAGCGGAGCTTGCAGTGAGCCGAGATTGCGCCACTGCAGTCCGCAGTCCGACCTGGGCGACAGAGCGAGACTCCGTCTCAAAAAAAAAAAAAAA	AluYg6	no	CCTGGTCATTCTCAATGCAA	GGGGGAAAAGGAAGAAATCA	plus strand	antisense	-0.995894	0.0729025	yes	F	minus strand	-0.52686	0.151634	Height	rs10843164	0.96	1	0.92-1.00	strong	Protective	23563607	6e-12	1.16	0.68	Alu-449	ALU_umary_ALU_9107	0.316667	0.0902556	0.2326	0.0113
Alu-450	chr12:28438596-28438597	-	12p11.22	-	288	15	AAAGAAACACAG	GCCGGGCGCGGTGGCTCACGCCTGTAATCCCAGCACTTTGGGAGGCCGAGGCGGGTGGATCATGAGGTCAGGAGATNGAGACCATCCTGGCTAACAAGGTGAAACCCCGTCTNTANTAAAAAAAAAAATACAAAAAAAATTAGCCGGGCGCGGTGGCGGGCGCCTGTAGTCCCAGNTACTCGGGAGGCTGAGGCAGGAGAATGGCGTGAACCCGGGAGGCGGAGCTTGCAGTGAGCCGAGATTGCGCCACTGCAGTCCGCAGTCCGGCCTGGGCGACAGAGCGAGACTCCGTTTCAAAAAAAAAAAAAAAAAAAAAA	AluYb8	no	TTTCTGTGCCAGAGACTGGA	CATCAAATAGGTGATCAAAACA	minus strand	sense	0.0343721	0.0607928	no	.	.	.	.	.	.	.	.	.	.	.	.	.	.		Alu-450	ALU_umary_ALU_9108	0.233333	0.245008	0.2048	0.1377
Alu-458	chr12:9871146-9871147	-	12p13.31	-	296	18	AAAATATGAATTTTGG	GCCGGGCGCGGTGGCTCACGCCTGTAATCCCAGCACTTTGGGAGGCCGAGGCGGGTGGATCATGAGGTCAGGAGATNGAGACCATCCTGGCTAACAAGGTGAAACCCCGTCTNTANTAAAAAAAAAAATACAAAAAAAATTAGCCGGGCGCGGTGGCGGGCGCCTGTAGTCCCAGNTACTCGGGAGGCTGAGGCAGGAGAATGGCGTGAACCCGGGAGGCGGAGCTTGCAGTGAGCCGAGATTGCGCCACTGCAGTCCGCAGTCCGGCCTGGGCGACAGAGCGAGACTCCGTTTCAAAAAAAAAAAAAAAAAAAAAA	AluYb8	no	TCCCTGTCGTATAGAGTTTCCA	TGAGAACAAGGAGGGACATTC	minus strand	sense	0.544276	0.0565667	yes	F	plus strand	0.476735	0.0135974	.	.	.	.	.	.	.	.	.	.		Alu-458	ALU_umary_ALU_8988	0.308642	0.191094	0.2336	0.0635
Alu-516	chr12:57046757-57046758	-	12q13.3	-	101	n/a	n/a	GGCCGGGCGCGGTGGCTCACGCCTGTAATCCCAGCACTTTGGGAGGCCGAGACGGGCGGATCACGAGGTCAGGAGATCGAGACCATCCTGGCTAACACGATGAAACCCCGTCTCTACTAAAAATACAAAAATTAGCCGGGCATGGTGGCGCGCGCCTGTAGTCCCAGCTACACGGGAGGCTGAGGCAGGAGAATGGCGTGAACCCGGGAGGCGGAGCTTGCAGTGAGTCGAGATCGCGCCACTGCACTCCAGCCTGGGCGACAGAGCGAAACTCCGTCTCAAAAAAAAAAAAAAAAA	AluSq2	no	TCACAGGGGAATAGGAACCA	ACTCTCCTCCTGCTGTGTGG	plus strand	antisense	-0.0928951	0.134786	no	.	.	.	.	.	.	.	.	.	.	.	.	.	.		Alu-516	.	.	.	.	.
Alu-524	chr15:48740421-48740422	-	15q21.1	+	287	27	TAAAGTAGAAAAATA	GGCCGGGCGCGGTGGCTCACGCCTGTAATCCCAGCACTTTGGGAGGCCGAGGCGGGTGGATCATGAGGTCAGGAGATCGAGACCATCCTGGCTAACAAGGTGAAACCCCGTCTCTACTAAAAATACAAAAAATTAGCCGGGCGCGGTGGCGGGCGCCTGTAGTCCCAGCTACTCGGGAGGCTGAGGCAGGAGAATGGCGTGAACCCGGGAAGCGGAGCTTGCAGTGAGCCGAGATTGCGCCACTGCAGTCCGCAGTCCGGCCTGNCGACAGANCGAGACTCCGTCTCNNANAAAANANAANAANAAAAAAAAAN	AluYb8	no	TGGCTTAATCTAATTCCATTTATTTTG	TGCTAAAAGGAGCCCTGTGT	plus strand	sense	0.0696903	0.0603021	no	.	.	.	.	.	.	.	.	.	.	.	.	.	.		Alu-524	ALU_umary_ALU_10692	0.00555556	0.0111821	0.001	0.0378
Alu-525	chr15:49609604-49609605	-	15q21.2	+	281	13	AAAAAGTCAGGAAGC	GGCCGGGCGCGGTGGCTCACGCCTGTAATCCCAGCACTTTGGGAGGCCGAGGCGGGCGGATCACGAGGTCAGGAGATCGAGACCATCCCGGCTAAAACGGTGAAACCCCGTCTCTACTAAAAATACAAAAAATTAGCCGGGCGTAGTGGCGGGCGCCTGTAGTCCCAGCTACTTGGGAGGCTGAGGCAGGAGAATGGCGTGAACCCGGGAGGCGGAGCTTGCAGTGAGCCGAGATCCCGCCACTGCACTCCAGCCTGGGCGACAGAGCGAGACTCCGTCTCAAAAAAAAAAAAA	AluYa5	no	GGGGGAATGTTGAAGGATAGA	GGTTGGTTCCAAGTCTTTGC	plus strand	sense	0.293649	0.0938322	yes	F	minus strand	-0.222613	0.105223	Thyroid hormone levels	rs10519227	0.763	1	0.82-1.00	strong	Risk	23408906	1e-11	0.07	0.245	Alu-525	ALU_umary_ALU_10695	0.194444	0.0966454	0.1899	0.056
Alu-528	chr15:62318265-62318266	-	15q22.2	-	284	29	AAAACAACATATCTC	GGCCGGGCGCGGTGGCTCACGCCTGTAATCACAGCACTTTGGGAGGCCGAGGCGGGCGGATCACGAGGTCAAGAGATCGAGACCATCCCGGCTAAAACGGTGAAACCCCGTCTCTACTAAAAATACAAAAAAAAATTAGCCGGGCGTAGTGGCGGGCGCCTGTAGTCCCAGCTACTTGGGAGGCTGAGGCAGGAGAATGGCGTGAACCCGGGAGGCGGAGCTTGCAGTGAGCCGAGATCCCGCCACTGCACTCCAGCCTGGGCGACAGAGCGAGACTCCGTCTCAAAAAAAAAAAAAACAAAAAAAACAAAAA	AluYa5	no	TGGTTTCACAACCCATTTAGC	TTGACATTTGGAAGATTTGCAT	minus strand	sense	0.293317	0.0675968	yes	F	plus strand	0.295684	0.0426404	Height	rs7178424	0.781	1	0.83-0.99	strong	Risk	20881960	6e-09	0.02	0.47	Alu-528	ALU_umary_ALU_10766	0.455556	0.263179	0.3499	0.0855
Alu-530	chr15:73983310-73983311	-	15q24.2	-	285	29	AAAAGCATA	GGCCGGGCGCGGTGGCTCACGCCTGTAATCCCAGCACTTTGGGAGGCCGAGGCGGGCGGATCACGAGGTCAGGAGATCGAGACCATCCTGGCTAAAACGGTGAAACCCCGTCTCTACTAAAAAAAAATACAAAAAATTAGCCGGGCGTAGTGGCGGGCGCCTGTAGTCCCAGCTACTTGGGAGGCTGAGGCAGGAGAATGGCGTGAACCCGGGAGGCGGAGCTTGCAGTGAGCCGAGATCCCGCCACTGCACTCCAGCCTGGGCGACAGAGCGAGACTCCGTCTCAAAAAAAAAAAAAATTAAAAAAAAAAAAA	AluYa5	no	GAACTGGAAGCAGCCCACT	TCTGTAACTGAAGGACTCCTCAAA	plus strand	antisense	-1.50922	0.13378	yes	F	minus strand	-1.78224	0.153961	Liver enzyme levels (gamma-glutamyl transferase)	rs8038465	0.825	0.951	0.82-0.99	strong	Risk	22001757	1e-09	2.4	0.39	Alu-530	ALU_umary_ALU_10812	0.519481	0.232228	0.3171	0.121
Alu-534	chr16:11086408-11086409	-	16p13.13	+	281	19	AAAAAATAAAAAAGAA	GGCCGGGCGCGGTGGCTCACGCCTGTAATCCCAGCACTTTGGGAGGCCGAGGCGGGCGGATCACGAGGTCAGGAGATCGAGACCATCCCGGCTAAAACGGTGAAACCCCGTCTCTACTAAAAATACAAAAAATTAGCCGGGCGTAGTGGCGCGCGCCTGTAGTCCCAGCTACTTGGGAGGCTGAGGCAGGAGAATGGCGTGAACCCGGGAGGCGGAGCTTGCAGTGAGCCGAGATCGCGCCACTGCACTCCAGCCTGGGCGACAGAGCGAGACTCCGTCTCAAAAAAAAAAAAAAAAATA	AluYa5	no	CCTGTTGACCACCCTCTCC	CCCTCCTTAGAGGGCTTCC	minus strand	sense	-1.90093	0.215621	no	.	.	.	.	.	.	.	.	.	.	.	.	.	.		Alu-534	ALU_umary_ALU_10963	0.482759	0.214657	0.3052	0.0144
Alu-536	chr16:12002336-12002337	chr16:12002336-12002645	16p13.13	+	281	14	AAAAATACAAAAATTAG	GCCGGGCGCGGTGGCTCACGCCTGTAATCCCAGCACTTTGGGAGGCCGAGGCGGGCGGATCACGAGGTCAGGAGATCGAGACCATCCCGGCTAAAACGGTGAAACCCCGTCTCTACTAAAAATACAAAAAATTAGCCGGGCGTAGTGGCGGGCGCCTGTAGTCCCAGCTACTTGGGAGACTGAGGCGGGAGAATGGCGTGAACCCGGGAGGCGGAGCTTGCAGTGAGCCGAGATCCCGCCACTGCACTCCAGCCTGGGCGACAGAGCGAGACTCCGTCTCAAAAAAAAAAAAAAA	AluYa5	yes	ACCAAAACCATTTCAGATACCCT	TGTCACTGGGTAATTTCCTGGT	minus strand	antisense	1.0675	0.165047	yes	F	plus strand	0.744036	0.0328361	Menopause (age at onset)	rs10852344	0.752	1	0.88-1.00	strong	Protective	22267201	1e-11	0.17	0.415	Alu-536	.	0.561798	.	.	.
Alu-539	chr16:67253980-67253981	chr16:67253671-67253980	16q22.1	-	280	24	AAGAAATTTCTT	GGCCGGGCGTAGTGGCTCACACTGTAATCCCAGCGCTTTGGGAGGCCGAGGTGGGCGGATCATNTAAGGTTGGGAGTTTGAGACCAGNNGACCAGCATGGTGAAACCCTGTCTCTACTAAAAATACAAAAATTAGCTGGGTGTGGTGGCGCATGCCTGTAATCCCAANTACTCGGGAGGNTGAGGCAGGAGAATCGCTAGAACCCAGGAGGCGGAGGTTGCAGTGAGCCCAGATCGTGCCATTGCACTCCAGCCTGGGCTGGAGCAAAACTCCATTTCAAAAAAAAAAAAACAAAAAAAA	AluSp	yes	TGTCTTTGTCAAACCCATCTCA	AAGCCCAGCAAAATGAAGAA	minus strand	sense	-0.39362	0.11071	no	.	.	.	.	Coronary heart disease	rs3729639	1	1	0.76-1.00	strong	Protective	21347282	2e-11	0.09	0.44	Alu-539	.	0.933333	.	.	.
Alu-556	chr17:61731675-61731676	-	17q23.3	-	280	16	AAAAAAGGTCACGTACTG	GCCGGGCGCGGTGGCTCACGCCTGTAATCCCAGCACTTTGGGAGGCCGAGGCGGGCGGATCACGAGGTCAGGAGATCGAGACCATCCCGGCTAAAACGGTGAAACCCCGTCTCTACTAAAAATACAAAAAATTAGCCGGGCGTAGTGGCGGGCGCCTGTAGTCCCAGCTACTTGGGAGGCTGAGCCAGGAGAATGGCGTGAACCCGGGAGGCGGAGCTTGCAGTGAGCCGAGATCCCGCCACTGCACTCCAGCCTGGGCGACAGAGCGAGACTCCGTCTCAAAAAAAAAAAAAAAA	AluYa5	no	TGCACTGTCAAGATCTAAGAATCC	AGCAATTCCACGCCTAGGTA	plus strand	antisense	0.989281	0.049203	yes	F	minus strand	0.0694457	0.047938	Height	rs2665838	0.916	0.957	0.86-0.99	strong	Protective	20881960	5e-25	0.04	0.73	Alu-556	ALU_umary_ALU_11400	0.327586	0.0970447	0.1173	0.1785
Alu-589	chr2:198763448-198763449	-	2q33.1	-	261	41	AAAGAAACTAGGAA	GTAATCCCAGCACTTTGGGAGGCCGAGGCGGGCGGATCACGAGGTCAGGAGATCGAGACCATCCCGGCTAAAAAAACGGTGAAACCCCGTCTCTACTAAAAATACAAAAATTAGCCGGGCGTGGTGGCGGGCGCCTGTAGTCCCAGCTACTTGGGAGGCTGAGGCAGGAGAATGGCGTGAACCCGGGAGGCGGAGCTTGCAATGAGCCGAGATCGCGCCACTGCACTCCAGCCTGGGCGACAGAGCGAGACTCCGTCTCAAAAAAAAAAAAAAAAAAAGAAAAAAGAAAAAGAAAAAAG	AluY	no	CAGTGGAATGCTCTGAACCA	CATTGAGGTGATGGCAATAAGA	plus strand	antisense	0.141241	0.0605419	yes	F	minus strand	0.687089	0.0899081	Crohn's disease	rs6738825	0.92	1	0.91-1.00	strong	Protective	21102463	4e-09	1.06	0.473	Alu-589	ALU_umary_ALU_1894	0.558824	0.401358	0.4463	0.5363
Alu-596	chr2:242362287-242362288	-	2q37.3	+	288	25	AAAGAATCTCAGAGCA	GGCCGGGCGCGGTGGCTCACGCCTGTAATCCCAGCACTTTGGGAGGCCGAGGCGGGTGGATCATGAGGTCAGGAGATCGAGACCATCCTGGNTAACAAGGTGAAACCCCGTCTNTACTAAAAATACAAAAAATTAGCCGGGCGCGGTGGCGGGCGCCTGTAGTCCCAGNTACTCGGGAGGNTGAGGCAGGAGAATGGCGTGAACCCGGGAAGCGGAGCTTGCAGTGAGCCGAGATTGCGCCACTGCAGTCCGCAGTCCGGCCTGGGCGACAGAGCGAGATTCCGTTTCAAAAAAAAAAAAAAAAAAAAAAAAA	AluYb8	no	GAGTGCCTCTTCTCCTCCAA	GGGGCAGATCTTCTTGTGGA	minus strand	antisense	-0.173114	0.0766049	no	.	.	.	.	.	.	.	.	.	.	.	.	.	.		Alu-596	.	0.00561798	.	.	.
Alu-602	chr2:46928950-46928951	-	2p21	-	281	18	AAA	GGCCGGGCGCGGTGGCTCACGCCTGTAATCCCAGCACTTTGGGAGGCCGAGGCGGGCGGATCACGAGGTCAGGAGATCGAGACCATCCCGGCTAAAACGGTGAAACCCCGTCTCTACTAAAAATACAAAAAATTAGCCGGGCGTAGTGGCGGGCGCCTGCAGTCCCAGCTACTTGGGAGGCTGAGGCGGGAGAATGGCGTGAACCCGGGAGGCGGAGCTTGCAGTGAGCCGAGATCCCGCCACTGCACTCCAGCCTGGGCGACAGAGCGAGACTCCGTCTCNAAAAAANAAAAAAAAA	AluYa5	no	AAAGCATTCTCGTGCCAACT	AGGCACAGTTAAACCTCACCA	plus strand	antisense	0.830491	0.0406652	yes	F	minus strand	0.392831	0.0386147	Height	rs12474201	0.404	1	0.82-1.00	moderate	Risk	20881960	3e-13	0.03	0.35	Alu-602	ALU_umary_ALU_1171	0.533333	0.453874	0.3966	0.5348
Alu-605	chr2:56083843-56083844	chr2:56083540-56083843	2p16.1	-	281	15	AAAGATGAGTAGGAGT	GGCCGGGCGCGGTGGCTCACGCCTGTAATCCCAGCACTTTGGGAGGCCGAGGCGGGCGGATCACGAGGTCAGGAGATCGAGACCATCCCGGCTAAAACGGTGAAACCCCGTCTCTACTAAAAATACAAAAAATTAGCCGGGCGTAGTGGCGGGCGCCTGTAGTCCCAGCTACTTGGGAGGCTGAGTCAGGAGAATGGCGTGAACCCGGGAGGCGGAGCTTGCAGTGAGCCGAGATCCCGCCACTGCACTCCAGCCTGGGCGACAGAGCGAGACTCCGTCTCAAAAAAAAAAAAAAA	AluYa5	yes	AACTGTGACACGTGCTACAA	CTGTAGCCAGCCTTATCTGT	minus strand	sense	0.857324	0.0574023	no	.	.	.	.	Venous thromboembolism	rs1367228	0.769	0.914	0.79-0.97	strong	Protective	23509962	2e-09	1.49	NR	Alu-605	.	0.477011	.	.	.
Alu-609	chr2:652672-652673	-	2p25.3	+	281	25	AAAAGACATCTTTTA	GGCCGGGCGCGGTGGCTCACGCCTGTAATCCCAGCACTTTGGGAGGCCGAGGCGGGCGGATCACGAGGTCAGGAGATCGAGACCATCCCGGCTAAAACGGTGAAACCCCGTCTCTACTAAAAATACAAAAAATTAGCCGGGCGTAGTGGCGGGCGCCTGTAGTCCCAGCTACTTGGGAGGCTGAGGCAGGAGAATGGCGTGAACCCGGGAGGCGGAGCTTGCAGTGAGCCGAGATCCCGCCACTGCACTCCAGCCTGGACGACAGAGCGAGACTCCGTCTCNNNNNNNNNNNNNNNNNNNNANANN	AluYa5	no	AATTGCCAAGAATCCGTGAG	CTGCTCAGAAACCATGTCCA	minus strand	antisense	0.72493	0.0403833	yes	F	plus strand	0.436274	0.0807355	Obesity	rs10189761	1	1	0.86-1.00	strong	Protective	23563607	6e-24	1.24	0.82	Alu-609	ALU_umary_ALU_958	0.122093	0.0982428	0.1372	0.0825
Alu-645	chr3:158117244-158117245	chr3:158116933-158117244	3q25.32	-	283	37	AAAAAGGAAATAATAG	GGCCGGGCGCGGTGGCTCACGCCTGTAATCCCAGCACTTTGGGAGGCCGAGGCGGGCGGATCACGAGGTCAGGAGATCGAGACCATCCCGGCTAAAACGGTGAAACCCCGTCTCTACTAAAAATACAAAAAAAATTAGCCGGGCGTAGTGGCGGGCGCCTGTAGTCCCAGCTACTTGGGAGGCTGAGGCAGGAGAATGGCGTGAACCCGGGAGGCGGAGCTTGCAGTGAGCCGAGATCCCGCCACTGCACTCCAGCCTGGGCGACAGAGCGAGACTCCGTCTCAAAAAAAAAAAAAAAAAAAAAAAAAAAAAAAAAAAAAA	AluYa5	yes	TTGACAGAGAAGGAGTCTGTGG	ACACCAGCTCTGGCCCTTAC	plus strand	antisense	-0.318605	0.0457252	yes	F	minus strand	-0.135962	0.0791538	Height	rs2362965	1	1	0.94-1.00	strong	Risk	23563607	2e-09	1.12	0.5	Alu-645	.	0.444444	.	.	.
Alu-670	chr4:10722293-10722294	-	4p16.1	+	175	37	AAAGAACTGAACAAA	GGCCGGGCGCGGTGGCTCACGCCTGTAATCCCAGCACTTTGGGAGGCCGAGGCGGGCGGATCACGAGGTCAGGAGATCGAGACCATCCCGGCTAAAACGGTGAAACCCCGTCTCTACTAAAAATACAAAAAAATTAGCCGGGCGTAGTGGCGGGCGCCTGTAGTCCCAGCTACTTGGGAGGCTGAGGCAGGAGAATGGCGTGAACCCGGGAGGCGGAGCTTGCAGTGAGCCGAGATCCCGCCACTGCACTCCAGCCTGGGCGACAGAGTGAGACTCCGTCTCAAAAAAAAAAAAAAAAAAAAAAAAAAA	AluYc	no	GCAGATGACAAATGAGCGCA	TGGGGAGAGAATTATGTCAATGT	minus strand	antisense	0.269009	0.0356545	yes	F	plus strand	-0.0635173	0.291295	Myopia (pathological)	rs16872571	0.438	1	0.83-1.00	moderate	.	23049088	2e-10	NR	0.519	Alu-670	ALU_umary_ALU_3085	0.466667	0.284145	0.3509	0.143
Alu-673A	chr4:111383530-111383531	chr4:111383220-111383530	4q25	-	284	28	AAGAGATAGTGTGAG	GGCCGGGCGCGGTGGCTCACGCCTGTAATCCCAGCACTTTGGGAGGCCGAGGCGGGCGGATCACGAGGTCAGGAGATCGAGACCATCCCGGCTAAAACGGTGAAACCCCGTTTTTACTAAAAATACAAAAAAATTAGCCGGGCGTAGTGGCGGGCGCCTGTAGTCCCAGCTACTTGGGAGGCTGAGGCAGGAGAATGGCGTGAACCCGGGAGGCGGAGCTTGCAGTGAGCCGAGATCCCGCCACTGCACTCCAGCCTGGGCGACAGAGCGAGACTCCGTTTCAAAAAAAAAAAAAAAAA	AluYa5	yes	GTCATGAACACAAGCAAGCA	TTCCCTCTCTCTCACAGACG	plus strand	antisense	0.373626	0.0340392	yes	F	minus strand	0.768992	0.0223038	Metabolic traits	rs2087160	0.723	0.932	0.76-0.99	strong	Risk	21886157	7e-13	0.12	0.207	Alu-673A	.	0.155172	.	.	.
Alu-675	chr6:105222264-105222265	chr6:105221956-105222264	6q16.3	-	282	18	AAAAAAAAAAGAGA	GGCCGGGCGCGGTGGCTCACGCCTGTAATCCCAGCACTTTGGGAGGCCGAGGCGGGTGGATCATGAGGTCAGGAGATCGAGACCATCCTGGCTAACAAGGTGAAACCCCGTCTCTACTAAAAATACAAAAAATTAGCCGGGCGCGGTGGCGGGCGCCTGTAGTCCCAGCTACTCGGGAGGCTGAGGCAGGAGAATGGCGTGAACCCGGGAAGCGGAGCTTGCAGTGAGCCGAGATTGCGCCACTGCAGTCCGCAGTCCGACCTGGGCGACAGAGCGAGACTCCGTCTCAAAAAAAAAAAAAAAAAAAAAAAAAAAAAAAAAAAAAA	AluYa5	yes	TAGCTGTGATTCCCCCAACT	ACAATCTTGGGGCCAGTAAA	plus strand	antisense	0.086378	0.0934926	no	.	.	.	.	.	.	.	.	.	.	.	.	.	.		Alu-675	.	0.822785	.	.	.
Alu-699	chr6:28190532-28190533	chr6:28190215-28190532	6p22.1	-	288	38	AAGATGATAATA	GGCCGGGCGCGGTGGCTCACGCCTGTAATCCCAGCACTTTGGGAGGCCGAGGCGGGTTGATCATGAGGTCAGGAGATCGAGACCATCCTGGCTAACAAGGTGAAACCCCGTCTCTACTAAAAATACAAAAAATTAGCCGGGCGCGGTGGCGGGCGCCTGTAGTCCCAGCTACTCGGGAGGCTGAGGCAGGAGAATGGCGTGAACCCGGGAAGCGGAGCTTGCAGTGAGCCGAGATTGCGCCACTGCAGTCCGCAGTCCGACCTGGGCGACAGAGCGAGACTCCGTCTCNAAAAAAAAAAAAAAAAA	AluYb8	yes	TGTGAGCTAAAGGCTGGAAAA	GCAACCAGCAACTAGGGAAA	minus strand	sense	1.03648	0.0616071	no	.	.	.	.	.	.	.	.	.	.	.	.	.	.		Alu-699	.	0.576471	.	.	.
Alu-748	chr6:97017670-97017671	-	6q16.1	-	288	19	AAAAGAAACTCAC	GGCCGGGCGCGGTGGCTCACGCCTGTAATCCCAGCACTTTGGGAGGCCGAGGCGGGTGGATCATGAGGTCAGGAGATCGAGACCATCCTGGCTAACAAGGTGAAACCCCGTCTCTACTAAAAATACAAAAAATTAGCCGGGCGCGGTGGCGGGCGCCTGTAGTCCCAGCTACTCGGGAGGCTGANGCAGGAGAATGGCGTGAACCCGGGAGGCGGAGCTTGCAGTGAGCCGAGATTGCGCCACTGCAGTCCGCAGTCCGGCCTGGGCGACAGAGCGAGACTCCGTCTCNNNAAAAAAAAAAAAA	AluYb8	no	ATGCTGAGGGGTGTTGAAGT	TCACTGTCATGAAAACACACCA	plus strand	antisense	-0.0337106	0.0442729	yes	F	minus strand	-0.0451545	0.0707905	Migraine	rs11759769	0.887	1	0.87-1.00	strong	Risk	23793025	1e-11	1.1	0.22	Alu-748	ALU_umary_ALU_5395	0.183908	0.110623	0.175	0.0787
Alu-774	chr8:90669895-90669896	-	8q21.3	-	288	16	?	AATCCCAGCACTTTGGGAGGCCGAGGCGGGCGGATCACGAGGTCAAGAGATCGAGACCATCCCGGCTAAAACGGTGAAACCCCGTCTCTACTAAAAATACAAAAAAATTAGCCGGGCGTAGTGGCGGGCGCCTGTAGTCCCAGCTACTTGGGAGGCTGAGGCAGGAGAATGGCGTGAACCCGGGAGGCGGAGCTTGCAGTGAGCCGAGATCCCGCCACTGCACTCCAGCCTGGGCAACAGAGCGAGACTCCGTCTCAAAAAAAAAGAAAAAAAAAAAAAAAAAAAA	AluYb8	no	CAGAAGACCCATTTCCCAAA	AAATCCCCCTCTGTTGTTCC	minus strand	sense	-0.553974	0.0647967	no	.	.	.	.	.	.	.	.	.	.	.	.	.	.		Alu-774	ALU_umary_ALU_6932	0.55625	0.34345	0.4026	0.1286
Alu-778	chr9:126339966-126339967	-	9q33.3	+	256	30	AAAAAGAAATAGGTTTGT	GGCCGGGCGTGGTGGCTCACGCCTGTAATCCCAGCACTTTGGGAGGCCGAGGCGGGCGGATCACGAGGTCAGGAGATCGAGACCATCCCGGCTAGAACGGTGAAACCCCGTCTCTACTAAAAATACAAAAAATTAGCCGGGCGTAGTGGCGGGCGCCTGTAGTCCCAGCTACTTGGGAGGCTGAGGCAGGAGAATGGCGTGAACCCGGGAGGCGGAGCTTGCAGTGAGCCGAGATCCCGCCACTGCACTCCAGCCTGGGCGACAGAGCGAGACTCCGTCTCAAAAAAAAAAAAAAAAAAAAAAAAAAAAAA	AluYa5	no	TTCCTCTTGTTAGGGGTGACA	TTTACATGGGGGTGAATTCGT	plus strand	sense	0.0333646	0.0577939	no	.	.	.	.	.	.	.	.	.	.	.	.	.	.		Alu-778	ALU_umary_ALU_7700	.	0.00559105	0.001	0.0197
Alu-789	chr2:160856174-160856175	chr2:160855865-160856174	2q24.2	-	281	29	AAAAATTACGTA	GGCCGGGCGCGGTGGCTCATGCCTGTAATCCCAGCACTTTGGGAGGCCGAGGCGGGTGGATCATGAGGTCAGGAGATCGAGACCATCCTGGCTAACAAGGTGAAACCCCGTCTCTACTAAAACTACAAAAATTAGCCGGGCGCGGTGGCGGGCGCCTGTAGTCCCAGCTACTGGGGAGGCTGAGGCAGGAGAATGGCGTGAACCCGGGAAGCGGAGCTTGCAGTGAGCCGAGATTGCGCCACTGCAGTCCGCAGTCCGGCCTGGGCGACAGAGCGAGACTCCGTCTCAAAAAAAAAAAAAAAA	AluYa5	yes	GAGTTATTTATTGTATTTGCTGTCACC	CACATGAGATTTTAGGATAGAGAAGA	minus strand	sense	1.4511	0.0366214	yes	F	plus strand	0.748946	0.0154246	Bilirubin levels	rs2667011	0.804	1	0.83-1.00	strong	Risk	20639394	2e-13	0.04	0.248	Alu-789	.	0.133333	.	.	.
Alu-793	chr2:44080101-44080102	-	2p21	+	287	16	AAAGATTCAGGGGAGA	GGCCGGGCGCGGTGGCTCACGCCTGTAATCCCAGCACTTTGGGAGGCCGAGACGGGCAGATCACGAGGTCAGGAGATCGAGACCATCCTGGCTAACACGGTGAAACCCCGTCTCTACTAAAAATACAAAAATTAGCCGGGCATGGTGGCGCGCGCCTGTAGTCCCAGCTACACGGGAGGCTGAGGCAGGAGAATGGCGTGAACCCGGGAGGTGGAGCTTGCAGTGAGTCGAGATCGCGCCACTGCACTCCAGCCTGGGCGACAGAGCGAAACTCCGTCTCANAAAAAAAAAAANAAAANANAAAANNANANAAANAAAAAAAAAAA	AluYb9	no	CCACAACCTGGTGAAGACCT	TATTGATCCCCACCCTCTTG	plus strand	sense	1.08958	0.0423084	yes	F	minus strand	0.8664	0.0719007	.	.	.	.	.	.	.	.	.	.		Alu-793	ALU_umary_ALU_1156	0.0444444	0.0429313	0.0298	0.0749
Alu-798	chr20:57723455-57723456	chr20:57723455-57723764	20q13.32	+	280	40	AGAACAGAGCG	GGCCGGGCGCGGTGGCTCACGCCTGTAATCCCAGCACTTTGGGAGGCCGAGGCGGGCGGATCACGAGGTCAGGAGATCGAGACCATCCCGGCTAAAACGGTGAAACCCCGTCTCTACTAAAAATACAAAAAAAATTAGCCGGGCGTAGTGGCGGGCGCCTGTAGTCCCAGCTACTTGGGAGGCTGAGGCAGGAGAATGGCGTGAACCCGGGAGGCGGAGCTTGCAGTGAGCCGAGATCCCGCCACTGCACTCCAGCCTGGGCGACAGAGCGAGACTCCGTCTCAAAAAAAAAAAAAAAAAAAAAAAAAAAAAAAAAAAAAA	AluYg6	yes	TTGTTAAGTGCCGTTGGTCA	GCTGCAGGACCTCTGAATCT	plus strand	sense	0.122485	0.0865178	yes	F	minus strand	0.0335689	0.0872902	Blood pressure	rs6015450	1	1	0.76-1.00	strong	Protective	21909110	2e-12	0.52	0.07	Alu-798	DEL_pindel_50971	0.916667	0.0856629	0.1193	0.1679
