# Supplementary material for: Alu insertion variants alter gene transcript levels
Source: HighWire-hosted journal article supplement (doi:10.1101/gr.261305.120), 2021-11-19
Supplement: Supplemental_Table_S2_final.xlsx [file Supplemental_Table_S2_final.xlsx]

## Sheet: Supplemental_Table_S2
Table S2: Alu eQTLs with data from GTEx.										eQTL 1			eQTL 2			eQTL 3			eQTL 4			eQTL 5			eQTL 6			eQTL 7			eQTL 8			eQTL 9			eQTL 10			eQTL 11			eQTL 12			eQTL 13			eQTL 14
Alu	proxy SNP	r2	SNP allele on Alu haplotype	# of genes for SNP	Gene Symbol	Gencode Id	SNP allele upregulated (eQTL)	conflicting NES for gene dependent on tissue?	# tissues	P-Value	Normalized effect size (NES)	Tissue	P-Value	NES	Tissue	P-Value	NES	Tissue	P-Value	NES	Tissue	P-Value	NES	Tissue	P-Value	NES	Tissue	P-Value	NES	Tissue	P-Value	NES	Tissue	P-Value	NES	Tissue	P-Value	NES	Tissue	P-Value	NES	Tissue	P-Value	NES	Tissue	P-Value	NES	Tissue	P-Value
Alu-033	rs9384815	0.874	A	1	RP1-97J1.2	ENSG00000227012.2	G	no	1	8.2e-42	1.1	Testis
Alu-037	rs2066808	1	G	5	CNPY2	ENSG00000257727.1	G	no	3	3.7e-08	0.23	Nerve - Tibial	2.9e-06	0.22	Esophagus - Mucosa	3.4e-05	0.13	Lung
Alu-037	rs2066808	1	G	5	IL23A	ENSG00000110944.4	G	no	5	1.7e-09	0.52	Nerve - Tibial	2.2e-09	0.77	Pancreas	2.8e-07	0.69	Pituitary	3.9e-06	0.41	Thyroid	1.6e-05	0.75	Brain - Nucleus accumbens (basal ganglia)
Alu-037	rs2066808	1	G	5	MYL6B	ENSG00000196465.6	A	no	1	1.6e-05	-0.44	Pancreas
Alu-037	rs2066808	1	G	5	PAN2	ENSG00000135473.10	G	no	1	1.1e-06	0.23	Cells - Transformed fibroblasts
Alu-037	rs2066808	1	G	5	STAT2	ENSG00000170581.9	G	yes	3	3e-08	0.63	Liver	3.1e-08	0.47	Brain - Cerebellum	3.4e-06	0.44	Brain - Cerebellar Hemisphere
Alu-037	rs2066808	1	G	5	STAT2	ENSG00000170581.9	A	yes	3	3e-07	-0.33	Adipose - Visceral (Omentum)	2.9e-06	-0.24	Adipose - Subcutaneous	4.1e-06	-0.21	Nerve - Tibial
Alu-041	rs17245436	1	A	2	WDR1	ENSG00000071127.12	G	no	1	6e-05	0.22	Testis
Alu-041	rs17245436	1	A	2	SLC2A9	ENSG00000109667.7	A	yes	2	3.5e-07	-0.25	Esophagus - Muscularis	8.3e-07	-0.23	Artery - Tibial
Alu-041	rs17245436	1	A	2	SLC2A9	ENSG00000109667.7	G	yes	5	2.5e-10	0.66	Cells - EBV-transformed lymphocytes	3.8e-07	0.21	Thyroid	8.6e-07	0.19	Lung	3.1e-06	0.33	Pancreas	2.1e-05	0.39	Liver
Alu-043	rs1335532	1	A	2	CD58	ENSG00000116815.11	A	no	1	2.7e-11	-0.36	Esophagus - Mucosa
Alu-043	rs1335532	1	A	2	NAP1L4P1	ENSG00000177173.5	A	no	1	9.3e-07	-0.35	Esophagus - Mucosa
Alu-046	rs711082	1	T	1	RP1-34H18.1	ENSG00000231121.2	G	no	1	2.8e-05	0.34	Testis
Alu-052	rs9468304	0.948	A	1	SYCP2L	ENSG00000153157.8	A	no	1	2e-05	0.38	Whole Blood
Alu-056	rs4699197	1	T	1	GSTCD	ENSG00000138780.10	C	no	1	2.6e-05	-0.27	Esophagus - Muscularis
Alu-066	rs454422	1	C	1	MCM8	ENSG00000125885.9	C	no	44	3.6e-45	-0.73	Esophagus - Muscularis	1.6e-42	-0.66	Artery - Tibial	1.9e-40	-0.73	Nerve - Tibial	1.3e-37	-0.62	Testis	2.2e-33	-0.51	Esophagus - Mucosa	1e-31	-0.62	Thyroid	2.8e-30	-0.64	Adipose - Subcutaneous	1.3e-27	-0.52	Lung	1.6e-27	-0.75	Artery - Aorta	1.6e-27	-0.46	Muscle - Skeletal	3.5e-25	-0.45	Heart - Left Ventricle	8.6e-25	-0.75	Colon - Sigmoid	5.4e-24	-0.68	Adipose - Visceral (Omentum)	2.5e-22
Alu-074	rs7808120	1	G	2	CPED1	ENSG00000106034.13	A	no	2	2.6e-18	0.5	Cells - Transformed fibroblasts	5.2e-06	0.13	Adipose - Subcutaneous
Alu-074	rs7808120	1	G	2	WNT16	ENSG00000002745.8	A	yes	1	3.1e-07	0.32	Adipose - Subcutaneous
Alu-074	rs7808120	1	G	2	WNT16	ENSG00000002745.8	G	yes	1	8.2e-06	-0.18	Skin - Sun Exposed (Lower leg)
Alu-077	rs860795	1	G	1	KCNJ6	ENSG00000157542.8	G	no	1	2.3e-07	0.36	Brain - Cortex
Alu-081	rs10134317	1	T	3	ATG14	ENSG00000126775.8	T	no	9	3.5e-11	0.18	Thyroid	1.6e-09	0.2	Esophagus - Muscularis	2.2e-09	0.15	Nerve - Tibial	1.9e-07	0.16	Adipose - Subcutaneous	2.5e-07	0.38	Brain - Cortex	6.1e-07	0.36	Brain - Nucleus accumbens (basal ganglia)	6.3e-07	0.3	Brain - Hippocampus	2.8e-06	0.3	Brain - Cerebellum	9.8e-06	0.4	Brain - Frontal Cortex (BA9)
Alu-082	rs10134318	1	T	3	FBXO34	ENSG00000178974.5	T	yes	1	8.1e-06	0.3	Brain - Cerebellum
Alu-083	rs9894429	0.813	T	3	TSPAN10	ENSG00000182612.6	T	no	20	3.3e-31	0.54	Cells - Transformed fibroblasts	1.7e-18	0.86	Brain - Cerebellar Hemisphere	2.6e-18	0.77	Brain - Cerebellum	8.5e-14	0.6	Liver	6.3e-13	0.38	Lung	2e-11	0.44	Heart - Atrial Appendage	3e-11	0.49	Testis	3.5e-11	0.3	Thyroid	5.1e-11	0.61	Ovary	1.2e-10	0.53	Adrenal Gland	3e-10	0.32	Skin - Not Sun Exposed (Suprapubic)	1.9e-09	0.3	Breast - Mammary Tissue	8.3e-09	0.52	Uterus	1.2e-08
Alu-083	rs9894429	0.813	T	3	NPLOC4	ENSG00000182446.9	C	no	3	4.8e-07	-0.28	Testis	9.2e-06	-0.22	Pituitary	2.6e-05	-0.13	Thyroid
Alu-083	rs9894429	0.813	T	3	PDE6G	ENSG00000185527.7	T	no	1	1.6e-07	0.38	Testis
Alu-083	rs10134319	1	T	3	FBXO34	ENSG00000178974.5	C	yes	1	8.7e-06	-0.16	Thyroid
Alu-084	rs10134320	1	T	3	LGALS3	ENSG00000131981.11	C	no	1	9e-15	-0.51	Pituitary
Alu-096	rs7339965	0.919	G	1	LEPR	ENSG00000116678.14	G	no	1	2.3e-05	-0.36	Brain - Cortex
Alu-098	rs571676	1	C	2	RANBP9	ENSG00000010017.9	T	no	2	9.6e-08	-0.088	Esophagus - Mucosa	2.3e-05	-0.18	Artery - Aorta
Alu-098	rs571676	1	C	2	SIRT5	ENSG00000124523.10	T	no	2	7.3e-06	-0.2	Thyroid	1.4e-05	-0.17	Skin - Not Sun Exposed (Suprapubic)
Alu-099	rs6895675	0.903	C	1	IRX1	ENSG00000170549.3	C	no	2	2.7e-15	0.53	Muscle - Skeletal	3.2e-08	0.44	Artery - Tibial
Alu-101	rs312975	1	A	2	APOB	ENSG00000084674.9	G	no	3	6.9e-11	-0.3	Heart - Left Ventricle	3.7e-07	-0.24
Alu-101	rs312975	1	A	2	TDRD15	ENSG00000218819.3	A	no	1	7.5e-06	0.46	Liver
Alu-213	rs7635110	1	C	1	ADCY5	ENSG00000173175.10	T	no	10	2.8e-12	-0.22	Artery - Tibial	4.6e-09	-0.41	Colon - Sigmoid	1.8e-08	-0.22	Lung	6.6e-08	-0.21	Thyroid	3.2e-06	-0.2	Esophagus - Muscularis	5.3e-06	-0.16	Heart - Atrial Appendage	5.3e-06	-0.18	Muscle - Skeletal	1.6e-05	-0.15	Colon - Transverse	2.8e-05	-0.11	Esophagus - Mucosa	3.9e-05	-0.14	Artery - Aorta
Alu-253	rs214056	1	G	1	SCGN	ENSG00000079689.9	G	no	3	1.4e-13	-0.46	Adipose - Visceral (Omentum)	3.6e-08	-0.28	Adipose - Subcutaneous	9.9e-07	-0.29	Thyroid
Alu-260	rs283040	1	G	3	CEP85L	ENSG00000111860.9	G	no	1	8.1e-05	0.13	Skin - Not Sun Exposed (Suprapubic)
Alu-260	rs283040	1	G	3	SLC35F1	ENSG00000196376.6	A	no	1	4.4e-08	-0.45	Testis
Alu-260	rs283040	1	G	3	SSXP10	ENSG00000217330.1	G	no	4	1e-09	0.29	Artery - Tibial	2.9e-07	0.42	Colon - Transverse	2.5e-05	0.35	Heart - Atrial Appendage	9.2e-05	0.25	Adipose - Subcutaneous
Alu-272	rs7309197	1	A	1	LRRK2	ENSG00000188906.9	A	no	2	2e-06	0.15	Nerve - Tibial	1.1e-05	0.16	Esophagus - Muscularis
Alu-274	rs16857609	0.953	T	1	DIRC3	ENSG00000231672.2	T	no	2	3.5e-07	0.31	Skin - Sun Exposed (Lower leg)	6.3e-07	0.33	Skin - Not Sun Exposed (Suprapubic)
Alu-276	rs2821293	0.958	A	1	RPL31P12	ENSG00000227207.2	G	no	2	7.2e-14	-0.79	Brain - Cerebellum	9.5e-08	-0.64	Brain - Cerebellar Hemisphere
Alu-283	rs483416	1	A	4	WDR66	ENSG00000158023.5	A	yes	14	6.7e-18	0.66	Cells - Transformed fibroblasts	3.3e-13	0.49	Artery - Tibial	1.3e-10	0.57	Brain - Cerebellum	2.5e-07	0.33	Artery - Aorta	5.3e-07	0.2	Adipose - Subcutaneous	1.5e-06	0.45	Artery - Coronary	2.8e-06	0.4	Heart - Atrial Appendage	6.1e-06	0.23	Nerve - Tibial	1.1e-05	0.47	Colon - Sigmoid	1.4e-05	0.41	Brain - Cerebellar Hemisphere	1.5e-05	0.29	Esophagus - Muscularis	2.9e-05	0.13	Lung	3.3e-05	0.31	Colon - Transverse	3.4e-05
Alu-283	rs483416	1	A	4	BCL7A	ENSG00000110987.4	G	yes	1	7.1e-16	-0.34	Muscle - Skeletal
Alu-283	rs483416	1	A	4	HPD	ENSG00000158104.7	G	no	4	7.8e-10	-0.38	Whole Blood	5.9e-08	-0.3	Muscle - Skeletal	9.3e-07	-0.39	Heart - Left Ventricle	2.6e-06	-0.27	Artery - Aorta
Alu-283	rs483416	1	A	4	PSMD9	ENSG00000110801.9	G	no	2	6e-15	-0.24	Thyroid	2e-06	-0.12	Whole Blood
Alu-283	rs483416	1	A	4	WDR66	ENSG00000158023.5	G	yes	3	2e-07	-0.33	Skin - Sun Exposed (Lower leg)	2.5e-07	-0.31	Skin - Not Sun Exposed (Suprapubic)	2.4e-06	-0.3	Esophagus - Mucosa
Alu-283	rs483416	1	A	4	BCL7A	ENSG00000110987.4	A	yes	1	1.8e-07	0.26	Nerve - Tibial
Alu-311	rs10742820	1	C	11	C1QTNF4	ENSG00000172247.3	C	no	19	1.2e-21	-0.43	Skin - Sun Exposed (Lower leg)	3.9e-17	-0.34	Adipose - Subcutaneous	3e-14	-0.39	Skin - Not Sun Exposed (Suprapubic)	1e-11	-0.36	Esophagus - Muscularis	3e-11	-0.32	Adipose - Visceral (Omentum)	6e-11	-0.32	Muscle - Skeletal	1.1e-10	-0.63	Spleen	1.4e-10	-0.24	Nerve - Tibial	1.1e-09	-0.31	Lung	2.1e-07	-0.44	Liver	2.3e-07	-0.24	Artery - Tibial	3.7e-07	-0.28	Esophagus - Mucosa	3.8e-06	-0.24	Breast - Mammary Tissue	4.2e-06
Alu-311	rs10742820	1	C	11	PIGF	ENSG00000151665.8	C	no	1	1.7e-05	-0.16	Skin - Not Sun Exposed (Suprapubic)
Alu-311	rs10742820	1	C	11	MYBPC3	ENSG00000134571.6	C	no	1	7.7e-05	-0.19	Lung
Alu-311	rs10742820	1	C	11	RAPSN	ENSG00000165917.5	C	no	1	7.9e-06	-0.29	Adipose - Visceral (Omentum)
Alu-311	rs10742820	1	C	11	CELF1	ENSG00000149187.13	T	no	1	4.2e-05	0.11	Nerve - Tibial
Alu-311	rs10742820	1	C	11	FNBP4	ENSG00000109920.8	T	no	2	1e-13	0.2	Muscle - Skeletal	1.4e-09	0.21	Cells - Transformed fibroblasts
Alu-311	rs10742820	1	C	11	MTCH2	ENSG00000109919.5	T	no	1	9.6e-05	0.1	Testis
Alu-311	rs10742820	1	C	11	NDUFS3	ENSG00000213619.5	T	no	2	1.3e-05	0.18	Brain - Cerebellar Hemisphere	4.1e-05	0.24	Brain - Cerebellum
Alu-311	rs10742820	1	C	11	NUP160	ENSG00000030066.9	T	no	1	7.4e-05	0.15	Muscle - Skeletal
Alu-311	rs10742820	1	C	11	PSMC3	ENSG00000165916.4	T	no	3	7.2e-08	0.2	Liver	9.1e-05	0.08	Lung	9.5e-05	0.11	Adipose - Subcutaneous
Alu-311	rs10742820	1	C	11	SLC39A13	ENSG00000165915.9	T	no	2	3.1e-05	0.09	Artery - Tibial	3.5e-05	0.16	Brain - Cerebellum
Alu-323	rs10865974	1	G	9	NEK4	ENSG00000114904.8	G	no	20	6.7e-14	-0.27	Thyroid	2.5e-12	-0.29	Nerve - Tibial	1.5e-11	-0.22	Skin - Sun Exposed (Lower leg)	2e-10	-0.3	Heart - Atrial Appendage	2.3e-10	-0.27	Esophagus - Mucosa	6.8e-10	-0.24	Artery - Tibial	8.3e-10	-0.26	Adipose - Visceral (Omentum)	1.8e-09	-0.23	Cells - Transformed fibroblasts	5.9e-09	-0.15	Muscle - Skeletal	7e-09	-0.29	Breast - Mammary Tissue	1.4e-07	-0.25	Adipose - Subcutaneous	1.7e-07	-0.18	Esophagus - Muscularis	6.7e-07	-0.47	Minor Salivary Gland	1.2e-06
Alu-323	rs10865974	1	G	9	ITIH4	ENSG00000055955.11	T	no	18	5.2e-17	0.57	Artery - Aorta	3.7e-15	0.45	Artery - Tibial	2e-14	0.32	Thyroid	2.3e-12	0.28	Whole Blood	4.8e-12	0.33	Lung	4.1e-11	0.37	Cells - Transformed fibroblasts	2.4e-10	0.24	Skin - Sun Exposed (Lower leg)	4.9e-10	0.29	Esophagus - Mucosa	1.5e-08	0.16	Muscle - Skeletal	1.8e-08	0.25	Skin - Not Sun Exposed (Suprapubic)	3e-08	0.24	Nerve - Tibial	1.6e-07	0.18	Adipose - Subcutaneous	4.4e-07	0.42	Artery - Coronary	5.8e-07
Alu-323	rs10865974	1	G	9	GNL3	ENSG00000163938.12	G	no	14	1.7e-17	-0.63	Brain - Cerebellum	8.9e-13	-0.15	Cells - Transformed fibroblasts	2.8e-12	-0.26	Testis	3.7e-12	-0.22	Artery - Tibial	2.2e-10	-0.21	Esophagus - Muscularis	5.1e-10	-0.42	Brain - Cerebellar Hemisphere	2.7e-09	-0.15	Nerve - Tibial	1.1e-08	-0.23	Pituitary	3.4e-08	-0.15	Heart - Left Ventricle	4.7e-08	-0.21	Artery - Coronary	9.6e-08	-0.1	Muscle - Skeletal	6.1e-07	-0.18	Artery - Aorta	1.5e-06	-0.16	Heart - Atrial Appendage
Alu-323	rs10865974	1	G	9	GLYCTK	ENSG00000168237.13	G	no	9	2e-11	-0.22	Lung	3.2e-09	-0.22	Thyroid	3.5e-07	-0.17	Whole Blood	1.3e-06	-0.21	Nerve - Tibial	2.1e-06	-0.18	Esophagus - Mucosa	4.1e-06	-0.24	Esophagus - Gastroesophageal Junction	9.4e-06	-0.32	Brain - Cerebellum	1.2e-05	-0.17	Esophagus - Muscularis	1.8e-05	-0.13	Colon - Transverse
Alu-323	rs10865974	1	G	9	NT5DC2	ENSG00000168268.6	G	no	7	2.9e-17	-0.26	Skin - Sun Exposed (Lower leg)	3.6e-15	-0.26	Thyroid	2.8e-14	-0.23	Skin - Not Sun Exposed (Suprapubic)	3.7e-10	-0.28	Colon - Transverse	6e-09	-0.24	Testis	5e-08	-0.2	Nerve - Tibial	3.2e-07	-0.096	Cells - Transformed fibroblasts
Alu-323	rs10865974	1	G	9	PBRM1	ENSG00000163939.14	G	yes	1	2.7e-06	-0.11	Cells - Transformed fibroblasts
Alu-323	rs10865974	1	G	9	PPM1M	ENSG00000164088.13	G	no	1	5.8e-05	-0.32	Brain - Cerebellum
Alu-323	rs10865974	1	G	9	MUSTN1	ENSG00000272573.1	T	no	2	2.9e-12	0.44	Artery - Aorta	6.7e-05	0.15	Whole Blood
Alu-323	rs10865974	1	G	9	PBRM1	ENSG00000163939.14	T	yes	2	1.6e-49	0.45	Thyroid	3.3e-25	0.22	Artery - Tibial
Alu-323	rs10865974	1	G	9	TMEM110	ENSG00000213533.7	T	no	6	1.8e-09	0.2	Muscle - Skeletal	1.7e-06	0.2	Lung	3e-06	0.25	Artery - Aorta	9.1e-06	0.19	Nerve - Tibial	3.7e-05	0.17	Thyroid	6e-05	0.15	Adipose - Subcutaneous
Alu-328	rs6087663	0.956	A	10	GSS	ENSG00000100983.5	A	no	10	3.2e-11	-0.32	Heart - Left Ventricle	2e-08	-0.36	Esophagus - Gastroesophageal Junction	6.4e-08	-0.16	Lung	1.9e-07	-0.18	Esophagus - Mucosa	2.3e-07	-0.19	Muscle - Skeletal	5e-07	-0.23	Esophagus - Muscularis	3.1e-06	-0.23	Heart - Atrial Appendage	8.8e-06	-0.15	Skin - Sun Exposed (Lower leg)	6.2e-05	-0.14	Artery - Tibial	0.00011	-0.14	Nerve - Tibial
Alu-328	rs6087663	0.956	A	10	ACSS2	ENSG00000131069.15	A	no	1	9.4e-05	-0.18	Nerve - Tibial
Alu-328	rs6087663	0.956	A	10	EDEM2	ENSG00000088298.8	A	no	2	6e-05	-0.13	Lung	7.8e-05	-0.17	Esophagus - Mucosa
Alu-328	rs6087663	0.956	A	10	NCOA6	ENSG00000198646.9	A	no	4	2.2e-09	-0.16	Artery - Tibial	1.9e-07	-0.22	Heart - Atrial Appendage	2.5e-05	-0.2	Breast - Mammary Tissue	0.00014	-0.13	Thyroid
Alu-328	rs6087663	0.956	A	10	PIGU	ENSG00000101464.6	A	no	1	2.8e-09	-0.44	Testis
Alu-328	rs6087663	0.956	A	10	TP53INP2	ENSG00000078804.8	A	no	1	1.2e-06	-0.17	Artery - Tibial
Alu-328	rs6087663	0.956	A	10	TRPC4AP	ENSG00000100991.7	A	no	6	2.6e-08	-0.19	Nerve - Tibial	5.8e-08	-0.13	Lung	1.9e-07	-0.14	Thyroid	2.3e-05	-0.23	Esophagus - Gastroesophageal Junction	4.7e-05	-0.13	Esophagus - Muscularis	5.8e-05	-0.12	Skin - Sun Exposed (Lower leg)
Alu-328	rs6087663	0.956	A	10	GGT7	ENSG00000131067.12	G	no	1	2.6e-05	0.21	Skin - Not Sun Exposed (Suprapubic)
Alu-328	rs6087663	0.956	A	10	MAP1LC3A	ENSG00000101460.8	G	no	1	1.4e-05	0.14	Whole Blood
Alu-328	rs6087663	0.956	A	10	MYH7B	ENSG00000078814.11	G	no	4	2.3e-08	0.24	Artery - Aorta	1e-07	0.17	Artery - Tibial	2.7e-05	0.12	Nerve - Tibial	0.00012	0.15	Skin - Sun Exposed (Lower leg)
Alu-330	rs4235346	1	C	1	SLC2A9	ENSG00000109667.7	T	no	8	1.1e-10	0.67	Cells - EBV-transformed lymphocytes	2.2e-08	0.23	Thyroid	3.4e-06	0.18	Lung	8.6e-06	0.35	Brain - Cortex	9.3e-06	0.39	Ovary	1.3e-05	0.32	Pancreas	3e-05	0.31	Testis	6.2e-05	0.15	Esophagus - Mucosa
Alu-330	rs4235346	1	C	1	SLC2A9	ENSG00000109667.7	C	no	3	1.9e-06	-0.23	Esophagus - Muscularis	3.3e-05	-0.2	Muscle - Skeletal	4.3e-05	-0.2	Artery - Tibial
Alu-350	rs1368438	1	T	1	UBLCP1	ENSG00000164332.6	C	no	1	6.5e-06	-0.2	Brain - Cerebellum
Alu-351	rs1585471	1	G	1	TIFA	ENSG00000145365.10	A	no	2	1.3e-07	-0.24	Muscle - Skeletal	3e-05	-0.18	Esophagus - Muscularis
Alu-353	rs949537	0.92	C	1	CBX3P7	ENSG00000197692.5	C	no	1	1.1e-05	0.2	Skin - Sun Exposed (Lower leg)
Alu-354	rs11023237	1	A	3	COPB1	ENSG00000129083.8	A	no	2	6.7e-08	0.09	Whole Blood	7.9e-05	0.089	Cells - Transformed fibroblasts
Alu-354	rs11023237	1	A	3	PDE3B	ENSG00000152270.4	A	no	1	6e-07	0.33	Pancreas
Alu-354	rs11023237	1	A	3	RRAS2	ENSG00000133818.8	G	no	7	3.6e-09	-0.19	Nerve - Tibial	3.9e-09	-0.21	Lung	5e-07	-0.27	Testis	7.1e-06	-0.15	Skin - Sun Exposed (Lower leg)	7.5e-06	-0.16	Adipose - Subcutaneous	1.9e-05	-0.17	Esophagus - Mucosa	7.1e-05	-0.13	Artery - Tibial
Alu-355	rs10489231	1	A	1	PRRX1	ENSG00000116132.7	A	no	2	4.9e-08	0.23	Muscle - Skeletal	7.6e-08	0.35	Heart - Left Ventricle
Alu-357	rs12129979	1	T	3	NME7	ENSG00000143156.9	G	yes	28	8.2e-45	0.52	Thyroid	2.5e-31	0.44	Esophagus - Muscularis	3.9e-28	0.51	Cells - Transformed fibroblasts	5.2e-25	0.39	Artery - Tibial	1.1e-22	0.41	Skin - Sun Exposed (Lower leg)	1.7e-21	0.48	Artery - Aorta	5.6e-19	0.55	Colon - Sigmoid	1.2e-18	0.39	Esophagus - Mucosa	1.3e-18	0.29	Colon - Transverse	2e-18	0.32	Lung	7.2e-18	0.43	Esophagus - Gastroesophageal Junction	2.7e-17	0.39	Adipose - Visceral (Omentum)	9.1e-17	0.32	Nerve - Tibial	1.4e-15
Alu-357	rs12129979	1	T	3	ATP1B1	ENSG00000143153.8	T	no	3	1.6e-09	-0.29	Artery - Aorta	2.3e-06	-0.19	Adrenal Gland	4.2e-05	-0.19	Artery - Tibial
Alu-357	rs12129979	1	T	3	CCDC181	ENSG00000117477.8	G	no	6	1.1e-08	0.39	Esophagus - Muscularis	1.2e-06	0.27	Nerve - Tibial	4.6e-06	0.37	Esophagus - Gastroesophageal Junction	5.5e-06	0.26	Brain - Hypothalamus	1e-05	0.4	Pancreas	2e-05	0.24	Artery - Tibial
Alu-357	rs12129979	1	T	3	NME7	ENSG00000143156.9	T	yes	1	1.8e-08	-0.26	Heart - Left Ventricle
Alu-363	rs13035735	1	A	1	B3GNT7	ENSG00000156966.6	G	no	3	1.1e-09	-0.44	Artery - Aorta	5.2e-06	-0.32	Artery - Coronary	1.5e-05	-0.28	Heart - Atrial Appendage
Alu-372	rs241301	1	C	1	RP4-799G3.2	ENSG00000271399.1	T	no	1	9e-10	-0.34	Testis
Alu-376	rs6806687	1	C	2	RPN1	ENSG00000163902.7	T	no	17	4.3e-14	-0.2	Artery - Tibial	1.5e-13	-0.17	Adipose - Subcutaneous	3.8e-12	-0.14	Lung	5.9e-12	-0.15	Esophagus - Muscularis	3.8e-11	-0.14	Skin - Sun Exposed (Lower leg)	1e-10	-0.15	Skin - Not Sun Exposed (Suprapubic)	3.1e-10	-0.1	Thyroid	1.5e-09	-0.25	Testis	3.8e-09	-0.1	Nerve - Tibial	6.6e-08	-0.14	Artery - Aorta	3.6e-07	-0.12	Adipose - Visceral (Omentum)	7.4e-07	-0.17	Esophagus - Gastroesophageal Junction	6.9e-06	-0.093	Muscle - Skeletal	7.3e-06
Alu-376	rs6806687	1	C	2	POU5F1P6	ENSG00000242551.2	T	no	11	3e-24	-0.61	Thyroid	1.4e-15	-0.77	Pituitary	1.1e-09	-0.66	Brain - Nucleus accumbens (basal ganglia)	3.7e-08	-0.62	Brain - Cerebellar Hemisphere	1e-07	-0.58	Ovary	2.4e-07	-0.48	Testis	4.8e-07	-0.63	Brain - Hippocampus	4.7e-06	-0.6	Brain - Hypothalamus	5.1e-06	-0.49	Prostate	1.4e-05	-0.47	Brain - Cerebellum	1.8e-05	-0.45	Spleen
Alu-383	rs2518516	1	G	2	OR6K4P	ENSG00000180437.4	A	no	2	7e-10	0.3	Lung	1e-08	0.29	Whole Blood
Alu-383	rs2518516	1	G	2	OR6K3	ENSG00000203757.1	A	no	1	4.3e-07	0.26	Lung
Alu-449	rs10843146	1	C	2	CCDC91	ENSG00000123106.6	C	no	13	7.8e-16	0.37	Thyroid	9.6e-13	0.33	Skin - Sun Exposed (Lower leg)	7.9e-12	0.3	Skin - Not Sun Exposed (Suprapubic)	2.5e-10	0.31	Esophagus - Mucosa	1.6e-06	0.15	Heart - Left Ventricle	1.6e-06	0.16	Esophagus - Muscularis	2e-06	0.19	Cells - Transformed fibroblasts	5.1e-06	0.16	Heart - Atrial Appendage	1.7e-05	0.15	Artery - Tibial	1.8e-05	0.21	Adipose - Visceral (Omentum)	2e-05	0.23	Artery - Aorta	2.5e-05	0.22	Colon - Transverse	2.7e-05	0.19	Lung
Alu-449	rs10843146	1	C	2	RP11-967K21.1	ENSG00000247934.3	T	no	8	9.2e-08	-0.35	Heart - Atrial Appendage	3.1e-07	-0.31	Artery - Tibial	4.8e-07	-0.47	Pancreas	1e-06	-0.3	Muscle - Skeletal	2.9e-06	-0.34	Colon - Transverse	3.3e-06	-0.33	Adipose - Visceral (Omentum)	4e-06	-0.44	Pituitary	4e-06	-0.4	Stomach
Alu-458	rs10844569	1	C	2	CLECL1	ENSG00000184293.3	T	no	15	3.1e-18	-0.65	Nerve - Tibial	6.7e-16	-0.52	Lung	1.5e-12	-0.48	Adipose - Subcutaneous	1.3e-11	-0.47	Adipose - Visceral (Omentum)	2.3e-11	-0.68	Adrenal Gland	2.2e-09	-0.47	Esophagus - Muscularis	1.2e-08	-0.45	Artery - Aorta	9.5e-08	-0.42	Skin - Not Sun Exposed (Suprapubic)	1.4e-07	-0.38	Artery - Tibial	1.3e-06	-0.4	Heart - Atrial Appendage	1.8e-06	-0.51	Esophagus - Gastroesophageal Junction	2e-06	-0.62	Brain - Spinal cord (cervical c-1)	4.3e-06	-0.23	Colon - Transverse	6.3e-06
Alu-458	rs10844569	1	C	2	DDX12P	ENSG00000214826.4	C	no	1	2.3e-06	0.18	Esophagus - Mucosa
Alu-525	rs11630318	1	T	4	FAM227B	ENSG00000166262.11	A	no	10	1.9e-10	-0.29	Nerve - Tibial	1.9e-09	-0.25	Muscle - Skeletal	1.9e-07	-0.21	Lung	4.3e-07	-0.32	Artery - Tibial	1.7e-06	-0.28	Esophagus - Mucosa	7.6e-06	-0.22	Artery - Aorta	8.2e-06	-0.23	Adipose - Subcutaneous	2.2e-05	-0.24	Esophagus - Muscularis	2.6e-05	-0.2	Heart - Left Ventricle	3.8e-05	-0.21	Skin - Not Sun Exposed (Suprapubic)
Alu-525	rs11630318	1	T	4	SECISBP2L	ENSG00000138593.4	T	yes	1	2.4e-09	-0.12	Nerve - Tibial
Alu-525	rs11630318	1	T	4	DTWD1	ENSG00000104047.10	T	no	1	1.5e-08	0.26	Thyroid
Alu-525	rs11630318	1	T	4	FGF7	ENSG00000140285.5	T	no	2	6.2e-10	0.26	Muscle - Skeletal	1.7e-05	0.45	Spleen
Alu-525	rs11630318	1	T	4	SECISBP2L	ENSG00000138593.4	T	yes	2	9.7e-15	0.22	Lung	1.4e-14	0.28	Thyroid
Alu-528	rs1436958	0.961	T	2	C2CD4A	ENSG00000198535.5	T	no	1	2.9e-11	0.26	Lung
Alu-528	rs1436958	0.961	T	2	VPS13C	ENSG00000129003.11	G	no	7	2.5e-07	-0.09	Whole Blood	5.3e-07	-0.14	Skin - Sun Exposed (Lower leg)	7.4e-06	-0.1	Nerve - Tibial	1.2e-05	-0.22	Spleen	1.8e-05	-0.15	Esophagus - Muscularis	2.2e-05	-0.17	Skin - Not Sun Exposed (Suprapubic)	4e-05	-0.11	Artery - Tibial
Alu-530	rs8032531	0.873	G	1	CD276	ENSG00000103855.13	G	no	3	6.5e-17	0.68	Liver	1.1e-07	0.21	Heart - Left Ventricle	2.7e-06	0.24	Heart - Atrial Appendage
Alu-534	rs8050144	0.855	C	1	CLEC16A	ENSG00000038532.10	G	no	1	1.1e-05	0.12	Nerve - Tibial
Alu-536	rs33623	1	G	2	GSPT1	ENSG00000103342.8	G	no	5	1.1e-07	-0.098	Esophagus - Mucosa	3.7e-06	-0.11	Artery - Tibial	8.8e-06	-0.13	Stomach	1e-05	-0.15	Colon - Transverse	2.1e-05	-0.13	Artery - Aorta
Alu-536	rs33623	1	G	2	RSL1D1	ENSG00000171490.8	A	no	1	2.2e-07	0.12	Skin - Sun Exposed (Lower leg)
Alu-539	rs7193713	1	A	11	ACD	ENSG00000102977.9	A	no	1	1.2e-06	-0.2	Adipose - Subcutaneous
Alu-539	rs7193713	1	A	11	ATP6V0D1	ENSG00000159720.7	A	no	8	1.6e-11	-0.57	Testis	3.5e-08	-0.25	Muscle - Skeletal	4.2e-06	-0.18	Cells - Transformed fibroblasts	9.7e-06	-0.17	Skin - Not Sun Exposed (Suprapubic)	2e-05	-0.17	Nerve - Tibial	6.5e-05	-0.099	Whole Blood	8.2e-05	-0.22	Heart - Atrial Appendage	0.00018	-0.13	Skin - Sun Exposed (Lower leg)
Alu-539	rs7193713	1	A	11	E2F4	ENSG00000205250.4	A	no	1	3.9e-06	-0.14	Cells - Transformed fibroblasts
Alu-539	rs7193713	1	A	11	GFOD2	ENSG00000141098.8	A	no	1	3.7e-06	-0.24	Skin - Sun Exposed (Lower leg)
Alu-539	rs7193713	1	A	11	LRRC29	ENSG00000125122.10	A	no	7	4.8e-10	-0.38	Lung	1e-05	-0.33	Skin - Sun Exposed (Lower leg)	1.5e-05	-0.26	Heart - Left Ventricle	1.6e-05	-0.27	Cells - Transformed fibroblasts	3.4e-05	-0.3	Adipose - Subcutaneous	3.4e-05	-0.41	Spleen	0.00011	-0.3	Muscle - Skeletal
Alu-539	rs7193713	1	A	11	PARD6A	ENSG00000102981.5	A	no	1	9.4e-06	-0.38	Pancreas
Alu-539	rs7193713	1	A	11	B3GNT9	ENSG00000237172.3	G	no	1	1.2e-05	0.3	Esophagus - Gastroesophageal Junction
Alu-539	rs7193713	1	A	11	ELMO3	ENSG00000102890.10	G	no	8	1.8e-09	0.55	Cells - Transformed fibroblasts	6.5e-08	0.39	Adipose - Subcutaneous	6e-07	0.4	Esophagus - Muscularis	8.8e-07	0.35	Muscle - Skeletal	6.1e-06	0.33	Artery - Tibial	9.2e-06	0.28	Pituitary	1.7e-05	0.42	Artery - Aorta	2e-05	0.29	Adipose - Visceral (Omentum)
Alu-539	rs7193713	1	A	11	FHOD1	ENSG00000135723.9	G	no	2	3.3e-08	0.68	Prostate	2.7e-06	0.27	Lung
Alu-539	rs7193713	1	A	11	LRRC36	ENSG00000159708.13	G	no	1	5.8e-07	0.41	Thyroid
Alu-539	rs7193713	1	A	11	ZDHHC1	ENSG00000159714.6	G	no	1	6.2e-05	0.19	Lung
Alu-556	rs11658329	0.956	C	10	FTSJ3	ENSG00000108592.12	C	no	34	2.4e-20	0.48	Artery - Tibial	3.9e-18	0.39	Esophagus - Muscularis	3.3e-17	0.33	Skin - Sun Exposed (Lower leg)	7.6e-17	0.39	Heart - Atrial Appendage	8.3e-17	0.47	Artery - Aorta	8.8e-17	0.27	Muscle - Skeletal	1.9e-16	0.44	Nerve - Tibial	9.6e-16	0.33	Thyroid	1e-15	0.41	Adipose - Subcutaneous	2.2e-15	0.29	Lung	2.9e-15	0.33	Cells - Transformed fibroblasts	5.9e-14	0.47	Colon - Sigmoid	9.5e-13	0.44	Esophagus - Gastroesophageal Junction	1e-12
Alu-556	rs11658329	0.956	C	10	MAP3K3	ENSG00000198909.3	C	no	18	7.1e-14	0.2	Nerve - Tibial	1.8e-13	0.22	Skin - Sun Exposed (Lower leg)	2.1e-13	0.21	Lung	6.9e-13	0.25	Skin - Not Sun Exposed (Suprapubic)	1.1e-12	0.23	Thyroid	7.2e-11	0.39	Spleen	2.4e-08	0.16	Adipose - Subcutaneous	1.5e-07	0.22	Adipose - Visceral (Omentum)	1.9e-07	0.18	Esophagus - Mucosa	2e-07	0.15	Muscle - Skeletal	7.6e-07	0.13	Cells - Transformed fibroblasts	1.4e-06	0.13	Esophagus - Muscularis	2.5e-06	0.17	Artery - Aorta	3.1e-06
Alu-556	rs11658329	0.956	C	10	DDX42	ENSG00000198231.8	G	no	15	1.9e-16	-0.33	Pancreas	8.4e-13	-0.16	Artery - Tibial	1.9e-10	-0.28	Skin - Not Sun Exposed (Suprapubic)	3.9e-10	-0.56	Brain - Anterior cingulate cortex (BA24)	8e-10	-0.4	Brain - Cerebellum	4.7e-07	-0.48	Brain - Cortex	2.9e-06	-0.58	Brain - Hippocampus	3.3e-06	-0.13	Esophagus - Muscularis	3.5e-06	-0.38	Brain - Cerebellar Hemisphere	3.8e-06	-0.55	Brain - Amygdala	8e-06	-0.12	Thyroid	8.6e-06	-0.15	Esophagus - Mucosa	1.1e-05	-0.18	Artery - Aorta	2.1e-05
Alu-556	rs11658329	0.956	C	10	CCDC47	ENSG00000108588.9	C	no	2	9.3e-06	0.1	Cells - Transformed fibroblasts	8.4e-05	0.082	Esophagus - Mucosa
Alu-556	rs11658329	0.956	C	10	CD79B	ENSG00000007312.8	C	no	1	1.3e-08	0.29	Adipose - Subcutaneous
Alu-556	rs11658329	0.956	C	10	DCAF7	ENSG00000136485.10	C	no	1	5.7e-05	0.13	Esophagus - Muscularis
Alu-556	rs11658329	0.956	C	10	PSMC5	ENSG00000087191.8	G	no	1	1.6e-05	-0.16	Testis
Alu-556	rs11658329	0.956	C	10	SMARCD2	ENSG00000108604.11	C	no	1	2e-06	0.094	Whole Blood
Alu-556	rs11658329	0.956	C	10	STRADA	ENSG00000266173.1	C	no	4	1e-05	0.23	Cells - Transformed fibroblasts	2.5e-05	0.17	Adipose - Subcutaneous	3.9e-05	0.15	Nerve - Tibial	3.9e-05	0.083	Whole Blood
Alu-556	rs11658329	0.956	C	10	TCAM1P	ENSG00000240280.2	G	no	6	1.5e-09	-0.38	Adipose - Subcutaneous	2e-09	-0.25	Testis	1.8e-06	-0.34	Nerve - Tibial	3.7e-06	-0.3	Skin - Sun Exposed (Lower leg)	2.1e-05	-0.33	Skin - Not Sun Exposed (Suprapubic)	6.1e-05	-0.31	Thyroid
Alu-589	rs1369512	1	A	3	PLCL1	ENSG00000115896.11	T	yes	2	3.5e-16	-0.36	Whole Blood	5.5e-08	-0.22	Thyroid
Alu-589	rs1369512	1	A	3	PLCL1	ENSG00000115896.11	A	yes	1	5.4e-08	0.15	Cells - Transformed fibroblasts
Alu-589	rs1369512	1	A	3	RFTN2	ENSG00000162944.6	T	no	4	4.8e-12	-0.18	Lung	1.8e-09	-0.2	Adipose - Subcutaneous	2.1e-06	-0.31	Spleen	1.1e-05	-0.16	Muscle - Skeletal
Alu-589	rs1369512	1	A	3	SF3B1	ENSG00000115524.11	T	no	1	1.3e-05	-0.25	Brain - Hypothalamus
Alu-602	rs6544913	0.961	T	3	PIGF	ENSG00000151665.8	C	no	1	1.7e-05	-0.16	Skin - Not Sun Exposed (Suprapubic)
Alu-602	rs6544913	0.961	T	3	ATP6V1E2	ENSG00000250565.2	T	no	4	1.5e-06	-0.24	Skin - Not Sun Exposed (Suprapubic)	7.9e-06	-0.17	Muscle - Skeletal	2.5e-05	-0.22	Esophagus - Mucosa	2.7e-05	-0.21	Adipose - Subcutaneous
Alu-602	rs6544913	0.961	T	3	CRIPT	ENSG00000119878.5	C	no	1	4.1e-06	0.17	Adipose - Subcutaneous
Alu-605	rs4352264	0.881	T	1	EFEMP1	ENSG00000115380.14	T	no	2	8.8e-08	0.2	Thyroid	7.2e-06	0.18	Skin - Sun Exposed (Lower leg)
Alu-605	rs4352264	0.881	T	1	AC007743.1	ENSG00000233251.3	C	no	2	3.6e-05	-0.18	Lung
Alu-645	rs9880806	1	T	4	RSRC1	ENSG00000174891.8	T	no	10	3.6e-08	-0.28	Adipose - Visceral (Omentum)	1.6e-07	-0.18	Esophagus - Muscularis	6.4e-07	-0.21	Nerve - Tibial	7e-07	-0.21	Artery - Tibial	7.3e-07	-0.22	Adipose - Subcutaneous	1.2e-06	-0.22	Breast - Mammary Tissue	4.4e-06	-0.19	Skin - Sun Exposed (Lower leg)	1.7e-05	-0.19	Thyroid	3.2e-05	-0.19	Stomach	3.7e-05	-0.17	Colon - Transverse
Alu-645	rs9880806	1	T	4	LXN	ENSG00000079257.3	C	no	1	5.4e-05	0.19	Cells - Transformed fibroblasts
Alu-645	rs9880806	1	T	4	GFM1	ENSG00000168827.10	T	no	2	7.4e-06	-0.15	Skin - Not Sun Exposed (Suprapubic)	2.6e-05	-0.15	Artery - Aorta
Alu-645	rs9880806	1	T	4	MLF1	ENSG00000178053.13	T	no	2	3.5e-08	-0.34	Esophagus - Mucosa	5.7e-05	-0.23	Skin - Not Sun Exposed (Suprapubic)
Alu-670	rs13137278	0.961	G	1	HS3ST1	ENSG00000002587.5	G	no	1	1.8e-06	0.36	Cells - EBV-transformed lymphocytes
Alu-673A	rs6848906	0.939	T	1	ENPEP	ENSG00000138792.5	C	no	3	1.7e-19	0.78	Lung	4.1e-05	0.27	Esophagus - Muscularis	5.7e-05	0.24	Esophagus - Mucosa
Alu-675	rs6904317	0.911	A	1	HACE1	ENSG00000085382.7	C	no	1	9.7e-07	0.25	Esophagus - Mucosa
Alu-748	rs12214469	0.943	T	1	UFL1	ENSG00000014123.9	T	no	4	2.2e-09	0.16	Nerve - Tibial	6.4e-06	0.2	Pancreas	1.5e-05	0.27	Brain - Cerebellum	2.5e-05	0.1	Whole Blood
Alu-774	rs2202990	0.871	A	2	NBN	ENSG00000104320.9	A	no	1	6.8e-06	0.19	Artery - Tibial
Alu-774	rs2202990	0.871	A	2	RIPK2	ENSG00000104312.6	A	no	1	7.9e-06	0.16	Skin - Sun Exposed (Lower leg)
Alu-789	rs1567537	1	T	2	LY75	ENSG00000054219.9	C	no	19	1.1e-12	0.46	Adipose - Subcutaneous	5.9e-11	0.38	Artery - Tibial	1.1e-10	0.37	Lung	2.6e-10	0.4	Cells - Transformed fibroblasts	1.8e-09	0.34	Skin - Sun Exposed (Lower leg)	1.3e-08	0.31	Breast - Mammary Tissue	7.6e-08	0.39	Esophagus - Mucosa	1.3e-07	0.57	Vagina	1.3e-07	0.26	Whole Blood	2.6e-07	0.37	Nerve - Tibial	4e-07	0.46	Heart - Left Ventricle	1.8e-06	0.3	Thyroid	2.5e-06	0.46	Prostate	2.8e-06
Alu-789	rs1567537	1	T	2	PLA2R1	ENSG00000153246.7	C	no	3	6.6e-07	0.26	Esophagus - Mucosa	1.8e-05	0.2	Thyroid	3.7e-05	0.13	Cells - Transformed fibroblasts
[truncated: 92 more columns]

## Sheet: legend
Table S2: Alu eQTLs with data from GTEx. Each line is a differentially expressed gene associated with a polymorphic Alu element as measured by a proxy SNP (r2>0.8). On each line, the normalized effect size (NES) and p-value are shown for each tissue in which the differentially expressed gene is associated with the proxy SNP/Alu. The proxy SNP was phased with the Alu variant to determine the SNP a…
