# Supplementary material for: Alu insertion variants alter gene transcript levels
Source: HighWire-hosted journal article supplement (doi:10.1101/gr.261305.120), 2021-11-19
Supplement: Supplemental_Table_S3_final.xlsx [file Supplemental_Table_S3_final.xlsx]

## Sheet: Supplemental_Table_S3
Alu	hg19	start (hg19)	HeLaS3	H1hESC	HUVEC	K562	GM12878	HEPG2
Alu-031	chr3	148909350	Repressed	Repressed	.	Repressed	Repressed	Transcription
Alu-032	chr19	31017349	Repressed	Repressed	Repressed	Repressed	.	Repressed
Alu-033	chr6	112203867	Repressed	Repressed	Repressed	Repressed	Repressed	Repressed
Alu-037	chr12	56753236	.	.	.	Transcription Start Site	.	.
Alu-041	chr4	9956834	Repressed	Repressed	Repressed	Repressed	Transcription	Transcription
Alu-043	chr1	117078181	Transcription	Repressed	Transcription	Transcription	Transcription	Transcription
Alu-046	chr12	77908979	Repressed	Repressed	Transcription	Repressed	.	Repressed
Alu-049	chr12	77965056	Repressed	Repressed	Repressed	Repressed	.	Repressed
Alu-051	chr1	56401293	Repressed	Repressed	Repressed	Repressed	Repressed	Repressed
Alu-052	chr6	11051769	Repressed	Repressed	Repressed	Repressed	Repressed	Transcription
Alu-053	chr3	18756126	Repressed	Repressed	Repressed	Repressed	Repressed	Repressed
Alu-056	chr4	106636862	CTCF	Repressed	CTCF	CTCF	.	CTCF
Alu-057	chr8	116488546	Repressed	Repressed	Repressed	Repressed	Repressed	Repressed
Alu-058	chr2	169886549	Repressed	Repressed	Repressed	Repressed	Repressed	Repressed
Alu-059	chr5	88043466	Transcription	Repressed	Transcription	Transcription	Transcription	Repressed
Alu-063	chr1	162080082	Repressed	Repressed	Transcription	Repressed	Repressed	Transcription
Alu-066	chr20	5943316	Transcription	Transcription	Transcription	Transcription	.	Transcription
Alu-072	chr1	8501990	Repressed	Repressed	Repressed	Repressed	Transcription	Transcription
Alu-074	chr7	120881116	Repressed	Repressed	Repressed	Transcription	Repressed	Repressed
Alu-076	chr5	109297408	Transcription	Repressed	Repressed	.	Repressed	Repressed
Alu-077	chr21	39004560	Repressed	Weak Enhancer	.	Repressed	.	Repressed
Alu-079	chr1	101389031	Transcription	Repressed	Transcription	Transcription	Transcription	Transcription
Alu-081	chr14	55795852	Repressed	Repressed	Transcription	Repressed	.	Repressed
Alu-082	chr4	86661078	Repressed	Repressed	Transcription	Repressed	Repressed	Repressed
Alu-083	chr17	79577696	Transcription	Transcription	Transcription	Transcription	.	Transcription
Alu-085	chr3	190669807	Repressed	Repressed	Repressed	Repressed	Repressed	Repressed
Alu-086	chr7	157350777	Repressed	Repressed	Repressed	Repressed	Repressed	Repressed
Alu-090	chr13	78584663	Repressed	Repressed	Repressed	Repressed	.	Repressed
Alu-093	chr5	88032029	Repressed	Repressed	Transcription	.	Enhancer	Repressed
Alu-095	chr1	222034158	Transcription	Repressed	Repressed	Repressed	Repressed	Repressed
Alu-096	chr1	66135720	Transcription	Repressed	Transcription	Repressed	Repressed	Repressed
Alu-098	chr6	13718467	Repressed	.	Repressed	Transcription	Repressed	Repressed
Alu-099	chr5	4075833	Repressed	Repressed	Repressed	Repressed	Repressed	Repressed
Alu-101	chr2	21381180	Repressed	Repressed	Repressed	Repressed	Repressed	Repressed
Alu-102	chr14	98494376	Transcription	Repressed	Transcription	Repressed	.	Repressed
Alu-103	chr8	128356667	Repressed	Repressed	Repressed	Repressed	Repressed	Repressed
Alu-168	chr8	109210923	Transcription	Repressed	Transcription	Transcription	Transcription	Repressed
Alu-181	chr10	30896100	Repressed	Repressed	Repressed	Repressed	.	.
Alu-202	chr4	106550746	Repressed	Repressed	Repressed	Repressed	Repressed	Repressed
Alu-204	chr3	46223795	Repressed	Repressed	Repressed	Repressed	Repressed	Repressed
Alu-208	chr5	23910436	Repressed	Repressed	Repressed	Repressed	Repressed	Repressed
Alu-212	chr3	37593903	Repressed	Repressed	Repressed	Repressed	Repressed	Repressed
Alu-213	chr3	123126629	Repressed	Repressed	Repressed	Repressed	Repressed	Repressed
Alu-215	chr1	197011871	Repressed	Transcription	Repressed	Repressed	Repressed	.
Alu-216	chr11	4802535	Repressed	Repressed	Repressed	Repressed	.	Repressed
Alu-251	chr3	87520483	Repressed	Repressed	Repressed	Repressed	Repressed	Repressed
Alu-253	chr6	25529885	Transcription	Repressed	Repressed	Repressed	Transcription	Repressed
Alu-259	chr14	68377012	Repressed	Repressed	Repressed	Repressed	.	Repressed
Alu-260	chr6	118626148	Repressed	Repressed	Repressed	Repressed	Repressed	Repressed
Alu-264	chr15	65733471	Transcription	Repressed	Transcription	Transcription	.	Transcription
Alu-268	chr1	93167520	Transcription	Repressed	Repressed	.	Repressed	Repressed
Alu-271	chr12	28163331	Transcription	Repressed	Repressed	Repressed	.	Repressed
Alu-272	chr12	40673009	Repressed	Repressed	Repressed	Repressed	.	Repressed
Alu-274	chr2	218265091	Repressed	Repressed	Transcription	Repressed	Repressed	Repressed
Alu-276	chr1	72639005	Repressed	Repressed	Repressed	Repressed	Repressed	Repressed
Alu-283	chr12	122319850	Repressed	Repressed	Repressed	.	.	Repressed
Alu-285	chr7	98754606	Repressed	Repressed	Repressed	Repressed	Repressed	Repressed
Alu-298	chr15	43856967	Repressed	Repressed	.	Repressed	.	Repressed
Alu-308	chr1	66079154	Repressed	Repressed	Repressed	Transcription	Repressed	Repressed
Alu-311	chr11	47806640	Transcription	Transcription	Transcription	Transcription	.	Transcription
Alu-323	chr3	52709849	Transcription	Transcription	Transcription	.	Transcription	Transcription
Alu-328	chr20	33621666	Transcription	Transcription	Transcription	Transcription	.	Transcription
Alu-330	chr4	9952309	Repressed	Repressed	Repressed	Repressed	Repressed	Transcription
Alu-350	chr5	158717157	Repressed	Repressed	Repressed	Repressed	Repressed	Repressed
Alu-351	chr4	112698424	Repressed	Repressed	Repressed	Repressed	Repressed	Repressed
Alu-353	chr11	88908937	Transcription	Repressed	Repressed	Repressed	.	Repressed
Alu-354	chr11	14500010	Transcription	Transcription	Transcription	Transcription	.	Transcription
Alu-355	chr1	170603451	Repressed	Repressed	Repressed	Repressed	Repressed	Repressed
Alu-357	chr1	169160349	Repressed	Repressed	.	Transcription	Repressed	Repressed
Alu-360	chr6	43895474	Weak Enhancer	Repressed	.	Enhancer	Repressed	.
Alu-363	chr2	232279813	Repressed	Repressed	CTCF	.	Repressed	Repressed
Alu-367	chr8	128119606	Transcription	Repressed	Repressed	Repressed	Repressed	Repressed
Alu-371	chr12	107122075	Repressed	Repressed	Repressed	Repressed	.	Repressed
Alu-372	chr1	228959918	Repressed	Repressed	Transcription	Repressed	Repressed	Repressed
Alu-376	chr3	128395208	Repressed	Repressed	Transcription	Repressed	Repressed	Repressed
Alu-378	chr3	128043091	Repressed	Repressed	.	Repressed	Repressed	.
Alu-383	chr1	158712047	Repressed	Repressed	Repressed	.	Repressed	Repressed
Alu-385	chr2	85772849	Transcription	Transcription	Transcription	Transcription	Transcription	Transcription
Alu-386	chr1	158629699	Repressed	Repressed	Repressed	Transcription	Repressed	Repressed
Alu-407	chr1	196761370	Repressed	Repressed	Repressed	Repressed	Repressed	Repressed
Alu-411	chr1	196779191	Repressed	Repressed	Repressed	Repressed	Repressed	Repressed
Alu-424	chr10	69994906	Repressed	Repressed	Repressed	Repressed	.	Repressed
Alu-449	chr12	28417298	Repressed	Repressed	Repressed	Repressed	.	Repressed
Alu-450	chr12	28438596	Repressed	Repressed	Repressed	Repressed	.	Repressed
Alu-458	chr12	9871146	Repressed	Repressed	Repressed	Repressed	.	Repressed
Alu-516	chr12	57046757	Repressed	Repressed	Repressed	Repressed	.	Repressed
Alu-524	chr15	48740421	Repressed	Repressed	.	Repressed	.	Repressed
Alu-525	chr15	49609604	Transcription	Repressed	Repressed	Transcription	.	Transcription
Alu-528	chr15	62318265	Transcription	Repressed	Repressed	Repressed	.	Transcription
Alu-530	chr15	73983310	Transcription	Repressed	Transcription	Repressed	.	Repressed
Alu-534	chr16	11086408	.	Repressed	.	.	.	Transcription
Alu-536	chr16	12002336	Transcription	Repressed	Transcription	Transcription	.	Transcription
Alu-539	chr16	67253980	Repressed	Repressed	Repressed	Repressed	.	Repressed
Alu-556	chr17	61731675	Transcription	Repressed	Transcription	Transcription	.	Transcription
Alu-589	chr2	198763448	Repressed	Repressed	Transcription	Transcription	Repressed	Repressed
Alu-596	chr2	242362287	Transcription	Repressed	Transcription	Repressed	Transcription	Transcription
Alu-602	chr2	46928950	.	.	Transcription	.	.	.
Alu-605	chr2	56083843	Enhancer	Repressed	Transcription	Repressed	Repressed	Repressed
Alu-609	chr2	652672	Repressed	Repressed	Repressed	Repressed	Repressed	Repressed
Alu-645	chr3	158117244	Repressed	Repressed	Repressed	Repressed	Transcription	Repressed
Alu-670	chr4	10722293	Repressed	Repressed	Repressed	Repressed	Repressed	Repressed
Alu-673A	chr4	111383532	Repressed	Repressed	Repressed	Repressed	Repressed	Repressed
Alu-675	chr6	105222264	Repressed	Transcription	Transcription	Repressed	Repressed	Repressed
Alu-699	chr6	28190532	Repressed	Repressed	.	.	Repressed	Repressed
Alu-748	chr6	97017670	Repressed	Repressed	Repressed	Repressed	Repressed	Repressed
Alu-774	chr8	90669895	Repressed	Repressed	Repressed	Repressed	Repressed	Repressed
Alu-778	chr9	126339966	Transcription	Repressed	Repressed	Repressed	Transcription	Transcription
Alu-789	chr2	160856174	.	Repressed	Repressed	Repressed	Repressed	Repressed
Alu-793	chr2	44080101	Repressed	Repressed	Repressed	Repressed	Repressed	Transcription
Alu-798	chr20	57723455	Repressed	Repressed	Repressed	Repressed	.	Repressed

## Sheet: legend
Table S3: ChromHMM annotation at polymorphic Alu loci for six cell lines.
Yellow highlighted block emphasize regions that have significant regulatory potential
