# Supplementary material for: Alu insertion variants alter gene transcript levels
Source: HighWire-hosted journal article supplement (doi:10.1101/gr.261305.120), 2021-11-19
Supplement: Supplemental_Table_S5_final.xlsx [file Supplemental_Table_S5_final.xlsx]

## Sheet: Supplemental_Table_S5
Table S5: Putative transcription factor binding sites in Alu sequences.
				Yb8	Yb8	Yb8	Yb8	Yb8	Yb8	Yb8	Yb8	Yb8	Yb8	Yb8	Yb8	Yb8	Yb8	Yb8	Yb8	Yb8	Yb8	Yb8	Yb8	Yb8	Yb8	Yb8	Yb8	Yb8	Yb8	Yb8	Yb9	Yb9	Yb9	Yb9	Yb9	Yb9	Yb9	Yb9	Yd8	Yd8	Yd8	Ya5	Ya5	Ya5	Ya5	Ya5	Ya5	Ya5	Ya5
	Factor	TRANSFAC matrix	PROMO ID	AluYb8	Alu-328	Alu-093	Alu-083	Alu-077	Alu-037	Alu-699	Alu-367	Alu-407	Alu-748	Alu-101	Alu-386	Alu-596	Alu-308	Alu-086	Alu-524	Alu-058	Alu-458	Alu-450	Alu-271	Alu-102	Alu-066	Alu-363	Alu-774	Alu-216	Alu-103	Alu-253	AluYb9	Alu-072	Alu-212	Alu-274	Alu-285	Alu-385	Alu-424	Alu-793	AluYd8	Alu-098	Alu-355	AluYa5	Alu-268	Alu-059	Alu-096	Alu-675	Alu-789	Alu-074	Alu-609
1	AHR:ARNT	T05394	AhR:Arnt [T05394]	.	.	.	.	.	.	.	.	.	.	.	.	.	.	.	.	.	.	.	.	.	.	.	.	.	.	.	.	.	.	.	.	.	.	.	.	.	.	.	.	.	.	.	.	.	.
2	PAX5	T00070	Pax-5 [T00070]	4	4	4	4	4	4	4	4	4	4	4	4	4	4	4	4	4	3	3	3	2	1	.	.	.	.	.	4	3	4	4	3	5	4	4	5	5	4	4	.	7	.	4	4	.	4
3	TP53	T00671	p53 [T00671]	4	4	4	4	4	4	4	4	4	4	4	4	4	4	4	4	4	3	3	3	2	1	.	.	.	.	.	4	3	4	4	3	5	4	4	5	5	4	4	.	7	.	4	4	.	4
4	GCFC2	T00320	GCF [T00320]	6	6	6	6	6	6	6	6	6	6	6	6	6	6	6	6	6	5	5	5	4	3	.	.	.	.	.	6	5	6	6	5	.	6	6	7	7	6	6	.	.	.	6	6	.	6
5	E2F1	T01542	E2F-1 [T01542]	8	8	8	8	8	8	8	8	8	8	8	8	8	8	8	8	8	7	7	7	6	5	.	.	.	.	.	8	7	8	8	7	.	8	8	9	9	8	8	.	9	.	8	8	.	8
6	.	T00255	ENKTF-1 [T00255]	12	12	12	12	12	12	12	12	12	12	12	12	12	12	12	12	12	11	11	11	10	9	.	.	.	.	.	12	11	12	12	11	.	12	12	13	13	12	12	.	.	12	12	12	.	12
7	AHR	T01795	AhR [T01795]	15	15	15	15	15	15	15	15	15	15	15	15	15	15	15	15	.	14	14	14	.	12	.	.	.	.	.	15	14	15	15	14	.	15	15	16	16	.	15	.	16	.	15	.	.	15
8	AHR:ARNT	T05394	AhR:Arnt [T05394]	16	16	16	16	16	16	16	16	16	16	16	16	16	16	16	16	.	15	15	15	.	13	0	.	.	.	.	16	15	16	16	15	.	16	16	17	17	.	16	22	17	.	16	.	.	16
9	TFAP2A	T00035	AP-2alphaA [T00035]	20	20	20	20	20	20	20	20	20	20	20	20	20	20	20	20	.	19	19	19	.	17	4	.	.	.	.	20	19	20	20	19	.	20	20	21	21	.	20	26	21	.	20	20	.	20
10	NR3C1	T00337	GR-alpha [T00337]	21	21	21	21	21	21	21	21	21	21	21	21	21	21	21	21	.	20	20	20	19	18	5	.	.	.	.	21	20	21	21	20	22	21	21	22	22	21	21	27	22	.	21	21	21	21
11	GTF2I	T00824	TFII-I [T00824]	25	25	25	25	25	25	25	25	25	25	25	25	25	25	25	25	.	24	24	24	23	22	9	.	.	.	.	25	24	25	25	24	26	25	25	26	26	25	25	31	26	25	25	25	25	25
12	NR3C1	T01920	GR-beta [T01920]	26	26	26	26	26	26	26	26	.	26	26	26	26	26	26	26	26	25	25	25	24	23	10	0	.	.	.	26	.	26	26	25	27	26	26	27	27	26	26	32	27	26	26	26	26	26
13	IKZF1	T02702	Ik-1 [T02702]	28	28	28	28	28	28	28	28	28	28	28	28	28	28	28	28	.	27	27	27	26	25	12	2	.	.	.	28	27	28	28	27	29	28	28	29	29	28	28	34	29	28	28	28	28	28
14	HNF4A	T03828	HNF-4alpha [T03828]	28	28	28	28	28	28	28	28	28	28	28	28	28	28	28	28	28	27	27	27	26	25	12	2	.	.	.	28	27	28	28	27	29	28	28	29	29	28	28	34	.	28	28	28	28	28
15	NR3C1	T05076	GR [T05076]	34	34	34	34	34	34	34	34	34	34	34	34	34	34	34	34	34	33	33	33	32	31	18	8	.	.	.	34	33	34	34	33	35	34	34	35	35	34	34	40	35	34	34	34	34	34
16	NFIC	T00094	NFI/CTF [T00094]	34	34	34	34	34	34	34	34	34	34	34	34	34	34	34	34	34	33	33	33	32	31	18	8	.	.	.	34	33	34	34	33	35	34	34	35	35	34	34	40	35	34	34	34	34	34
17	LEF1	T02905	LEF-1 [T02905]	36	36	36	36	36	36	36	36	36	36	36	36	36	36	36	36	36	35	35	35	34	33	20	10	.	.	.	36	35	36	36	35	37	36	36	37	37	36	36	42	.	.	36	36	36	36
18	SRY	T00997	SRY [T00997]	36	36	36	36	36	36	36	36	36	36	36	36	36	36	36	36	36	35	35	35	34	33	20	10	.	.	.	36	35	36	36	35	37	36	36	37	37	36	36	42	.	.	36	36	36	36
19	TCF4	T02878	TCF-4E [T02878]	36	36	36	36	36	36	36	36	36	36	36	36	36	36	36	36	36	35	35	35	34	33	20	10	.	.	.	36	35	36	36	35	37	36	36	37	37	36	36	42	.	36	36	36	36	36
20	TBP	T00820	TFIID [T00820]	37	37	37	37	37	37	37	37	37	37	37	37	37	37	37	37	37	36	36	36	35	34	21	11	.	.	.	37	36	37	37	36	38	37	37	38	38	37	37	43	38	.	37	37	37	37
21	CEBPB	T00581	C/EBPbeta [T00581]	38	38	38	38	38	38	38	38	38	38	38	38	38	38	38	38	38	37	37	37	36	35	22	12	.	.	.	38	37	38	38	37	39	38	38	39	39	38	38	44	39	38	38	38	38	38
22	NF1	T00539	NF-1 [T00539]	38	38	38	38	38	38	38	38	38	38	38	38	38	38	38	38	38	37	37	37	36	35	22	12	.	.	.	38	37	38	38	37	39	38	38	39	39	38	38	44	39	.	38	38	38	38
23	NR3C1	T00337	GR-alpha [T00337]	41	41	41	41	41	41	41	41	41	41	41	41	41	41	41	41	41	40	40	40	39	38	25	15	1	.	.	41	40	41	41	40	42	41	41	42	42	41	41	47	42	.	41	41	41	41
24	TFAP2A	T00035	AP-2alphaA [T00035]	41	41	41	41	41	41	41	41	41	41	41	41	41	41	41	41	41	40	40	40	39	38	25	15	1	.	.	41	40	41	41	40	42	47	41	42	42	41	41	47	42	.	41	41	41	41
25	NR3C1	T00337	GR-alpha [T00337]	47	47	47	47	47	47	47	47	47	47	47	47	47	47	47	47	47	46	46	46	45	44	31	21	7	.	.	47	46	47	47	46	48	47	.	48	48	47	47	53	48	.	47	47	47	47
26	TFAP2A	T00035	AP-2alphaA [T00035]	47	47	47	47	47	47	47	47	47	47	47	47	47	47	47	47	.	46	46	46	45	44	31	21	.	.	.	47	46	47	47	46	48	.	.	48	48	47	47	53	48	.	47	47	47	47
27	E2F1	T01542	E2F-1 [T01542]	51	51	51	51	51	51	51	51	51	51	51	.	51	51	51	51	.	50	50	50	49	48	35	25	.	.	.	51	50	51	51	50	52	51	.	52	52	51	51	57	52	.	51	51	51	51
28	SP1	T00759	Sp1 [T00759]	.	.	.	.	.	.	.	.	.	.	.	.	.	.	.	.	.	.	.	.	.	.	.	.	.	.	.	.	.	.	.	.	.	.	.	53	53	52	52	58	53	.	.	.	52	52
29	PAX5	T00070	Pax-5 [T00070]	.	.	.	.	.	.	.	.	.	.	.	.	.	.	.	.	.	.	.	.	.	.	.	.	.	.	.	.	.	.	.	.	.	.	.	54	54	53	53	59	54	.	.	.	53	53
30	TP53	T00671	p53 [T00671]	.	.	.	.	.	.	.	.	.	.	.	.	.	.	.	.	.	.	.	.	.	.	.	.	.	.	.	.	.	.	.	.	.	.	.	54	54	53	53	59	54	.	.	.	53	53
31	RXRA	T01345	RXR-alpha [T01345]	53	53	53	53	53	53	53	53	53	53	53	.	53	53	53	53	53	52	52	52	51	50	37	.	13	.	.	53	52	53	53	52	54	53	.	.	.	.	.	.	.	.	.	.	.	.
32	E2F1	T01542	E2F-1 [T01542]	.	.	.	.	.	.	.	.	.	.	.	.	.	.	.	.	.	.	.	.	.	.	.	.	.	.	.	.	.	.	.	.	.	.	.	56	56	55	55	61	56	.	.	.	55	55
33	XBP1	T00902	XBP-1 [T00902]	58	58	58	58	58	.	58	58	58	58	.	58	58	.	58	58	58	57	57	57	56	55	42	.	18	.	.	58	57	58	58	57	59	58	.	.	.	.	.	.	.	.	.	.	.	.
34	NR2F1	T00149	COUP-TF1 [T00149]	61	61	61	61	61	.	61	61	61	61	61	61	61	61	61	61	61	60	60	60	59	.	45	35	21	.	.	61	60	61	61	60	62	61	61	62	62	61	61	.	62	.	61	61	.	61
35	XBP1	T00902	XBP-1 [T00902]	62	62	62	62	62	.	62	62	62	62	.	62	62	.	62	62	62	61	61	61	60	59	46	.	22	.	.	62	61	62	62	61	63	62	.	.	.	.	.	.	.	.	.	.	.	.
36	NR3C1	T00337	GR-alpha [T00337]	63	63	63	63	63	.	63	63	63	63	63	63	63	63	63	63	63	62	62	62	61	60	47	37	23	.	.	63	62	63	63	62	64	63	63	64	64	63	63	.	64	.	63	63	.	63
37	ATF3	T01313	ATF3 [T01313]	63	63	63	63	63	.	63	63	63	63	.	63	63	.	63	63	63	62	62	62	61	.	47	.	23	.	.	63	62	63	63	62	64	63	.	.	.	.	.	.	.	.	.	.	.	.
38	JUN	T00133	c-Jun [T00133]	64	64	64	64	64	64	64	64	64	64	64	64	64	64	64	64	64	63	63	63	62	.	48	38	24	.	.	64	63	64	64	63	65	64	64	65	65	64	64	70	65	.	64	64	64	64
39	ESR1	T00261	ER-alpha [T00261]	66	66	66	66	66	66	66	66	66	66	66	66	66	66	66	66	66	65	65	65	64	.	50	40	26	.	.	66	65	66	66	65	67	66	66	67	67	66	66	72	67	.	66	66	66	66
40	NR3C1	T00337	GR-alpha [T00337]	68	68	68	68	68	68	68	.	68	68	68	68	68	68	68	68	.	67	67	67	66	.	.	.	28	.	.	68	67	68	68	67	69	68	68	69	69	68	68	74	69	.	68	68	68	68
41	GTF2I	T00824	TFII-I [T00824]	71	71	71	71	71	71	71	.	71	71	71	71	71	71	71	71	.	70	70	70	69	68	.	.	31	.	.	71	70	71	71	70	72	71	71	72	72	71	71	77	72	71	71	71	71	71
42	ETV4	T00685	PEA3 [T00685]	80	80	80	80	80	80	80	80	80	80	80	80	80	80	80	80	80	79	79	79	78	77	64	54	40	.	.	80	79	80	80	79	81	80	80	.	.	.	80	86	81	80	80	80	80	80
43	GTF2I	T00824	TFII-I [T00824]	82	82	82	82	82	82	82	82	82	82	82	82	82	82	82	82	82	81	81	81	80	79	66	56	42	.	.	82	81	82	82	81	83	82	82	.	.	.	82	88	83	82	82	82	82	82
44	YY1	T00915	YY1 [T00915]	82	82	82	82	82	82	82	82	82	82	82	82	82	82	82	82	82	81	81	81	80	79	66	56	42	.	.	82	81	82	82	81	83	82	82	.	.	.	82	88	83	82	82	82	82	82
45	NR3C1	T00337	GR-alpha [T00337]	86	86	86	86	86	86	86	86	86	86	86	86	86	86	86	86	86	85	85	85	84	83	70	.	46	.	.	86	85	86	86	85	87	86	86	.	.	.	.	.	.	.	.	.	.	.
46	HNF1A	T01951	HNF-1C [T01951]	87	87	87	87	87	87	87	87	87	87	87	87	.	87	87	87	87	86	86	86	85	84	.	.	47	.	.	87	86	87	87	86	88	87	87	.	.	.	.	.	.	.	.	.	.	.
47	.	T00255	ENKTF-1 [T00255]	88	.	.	.	.	.	.	.	.	.	.	.	.	.	.	.	.	.	.	.	.	.	.	.	.	.	.	88	.	.	.	.	.	.	.	.	.	.	92	98	93	92	.	.	92	92
48	FOXP3	T04280	FOXP3 [T04280]	.	88	88	88	88	88	88	88	88	88	88	88	.	88	88	88	88	87	87	87	86	85	72	.	48	.	.	92	87	88	88	87	89	88	88	.	.	.	92	98	93	92	.	.	92	92
49	PGR	T00696	PR B [T00696]	93	93	93	93	93	93	93	93	93	93	93	93	93	93	93	93	93	92	92	92	91	90	.	.	53	.	.	93	92	93	93	92	94	93	93	.	.	.	.	.	.	.	.	.	.	.
50	PGR	T01661	PR A [T01661]	93	93	93	93	93	93	93	93	93	93	93	93	93	93	93	93	93	92	92	92	91	90	.	.	53	.	.	93	92	93	93	92	94	93	93	.	.	.	.	.	.	.	.	.	.	.
51	RARB	T00721	RAR-beta [T00721]	94	94	94	94	94	94	94	94	94	94	94	94	94	94	94	94	94	93	93	93	92	91	78	68	54	.	.	94	93	94	94	93	95	94	94	83	83	82	94	100	95	94	94	94	94	94
52	CEBPB	T00581	C/EBPbeta [T00581]	94	94	94	94	94	94	94	94	94	94	94	94	94	94	94	94	.	93	93	93	92	91	78	.	54	.	.	94	.	94	94	93	95	94	.	.	.	.	.	.	.	.	.	.	.	.
53	NR3C1	T00337	GR-alpha [T00337]	95	95	95	95	95	95	95	95	95	95	95	95	95	95	95	95	.	94	94	94	93	92	79	.	55	.	.	95	.	95	95	94	96	95	.	.	.	.	.	.	.	.	.	.	.	.
54	NFKB1	T00593	NF-kappaB1 [T00593]	98	98	98	98	98	98	98	98	98	98	98	98	98	98	98	98	98	97	97	97	96	95	82	72	58	.	.	98	97	98	98	97	99	98	98	87	87	86	98	104	99	98	98	98	98	98
55	RARB	T00721	RAR-beta [T00721]	99	99	99	99	99	99	99	99	99	99	99	99	99	99	99	99	99	98	98	98	97	96	83	73	59	.	.	99	98	99	99	98	100	99	99	88	88	87	99	105	100	99	99	99	99	99
56	RXRA	T01345	RXR-alpha [T01345]	101	101	101	101	101	101	101	101	101	101	101	101	101	101	101	101	101	100	100	100	99	98	85	75	61	.	.	101	100	101	101	100	102	101	101	90	90	89	101	107	102	101	101	101	101	101
57	TBP	T00820	TFIID [T00820]	114	114	114	114	114	114	114	114	114	114	114	114	114	114	112	114	114	116	116	113	112	111	98	88	74	.	.	114	111	114	114	113	113	114	114	103	103	102	114	123	115	.	114	114	114	114
58	MEF2A	T01005	MEF-2A [T01005]	114	114	114	114	114	114	114	114	114	114	114	114	114	114	114	114	114	119	119	116	112	111	98	88	74	.	.	114	113	114	114	113	115	114	114	103	103	102	114	.	115	.	114	.	114	114
59	FOXA1	T02512	HNF-3alpha [T02512]	117	117	117	117	117	117	117	117	117	117	117	117	117	117	117	117	117	122	122	119	115	114	101	91	77	.	.	117	116	117	117	116	118	117	117	106	106	105	117	124	118	117	117	.	117	117
60	NR3C1	T01920	GR-beta [T01920]	121	121	121	121	121	121	121	121	121	121	121	121	121	121	121	121	121	126	126	123	119	118	105	95	81	.	.	121	120	121	121	120	122	121	121	110	110	109	121	128	122	121	121	.	121	121
61	HOXD9	T01424	HOXD9 [T01424]	121	121	121	121	121	121	121	121	121	121	121	121	121	121	121	121	121	126	126	123	119	118	105	95	81	.	.	121	120	121	121	120	122	121	121	110	110	109	121	128	122	121	121	.	121	121
62	HOXD10	T01425	HOXD10 [T01425]	121	121	121	121	121	121	121	121	121	121	121	121	121	121	121	121	121	126	126	123	119	118	105	95	81	.	.	121	120	121	121	120	122	121	121	110	110	109	121	128	122	121	121	.	121	121
63	TBP	T00820	TFIID [T00820]	123	123	123	123	123	123	123	123	123	123	123	123	123	123	123	123	123	128	128	125	121	120	107	97	83	.	.	123	122	123	123	122	124	123	123	112	112	111	123	130	124	123	123	123	123	123
64	CEBPB	T00581	C/EBPbeta [T00581]	124	124	124	124	124	124	124	124	124	124	124	124	124	124	124	124	124	129	129	126	122	121	108	98	84	.	.	124	123	124	124	123	125	124	124	113	113	112	124	131	125	124	124	124	124	124
65	NR3C1	T05076	GR [T05076]	125	125	125	125	125	125	125	125	125	125	125	125	125	125	125	125	125	130	130	127	123	122	109	99	85	.	.	125	124	125	125	124	126	125	125	114	114	113	125	132	126	125	125	125	125	125
66	FOXA1	T02512	HNF-3alpha [T02512]	126	126	126	126	126	126	126	126	126	126	126	126	126	126	126	126	126	133	133	130	124	123	110	101	86	.	.	126	125	126	126	125	127	126	125	115	115	115	126	133	128	129	126	.	131	126
67	NR3C1	T01920	GR-beta [T01920]	129	129	129	129	129	129	129	129	129	129	129	129	129	129	129	129	129	136	136	133	127	126	113	104	89	.	.	129	128	129	129	128	130	129	128	118	118	118	129	136	131	132	129	128	134	129
68	NR3C1	T01920	GR-beta [T01920]	130	130	130	130	130	130	130	130	130	130	130	130	130	130	130	130	130	137	137	134	128	127	114	105	90	.	.	130	129	130	130	129	131	130	129	119	119	119	130	137	132	133	130	129	135	130
69	AHR:ARNT	T05394	AhR:Arnt [T05394]	.	.	.	.	.	.	.	.	.	.	.	.	.	.	.	.	.	.	.	.	.	.	.	.	.	.	.	.	.	.	.	.	.	.	.	.	.	.	.	.	.	.	.	.	.	.
70	PAX5	T00070	Pax-5 [T00070]	138	138	138	138	138	138	138	138	138	138	.	138	138	.	138	138	138	145	145	142	136	135	122	113	98	.	.	138	137	138	138	137	.	138	137	127	127	129	138	145	154	.	138	137	.	138
71	TP53	T00671	p53 [T00671]	138	138	138	138	138	138	138	138	138	138	.	138	138	.	138	138	138	145	145	142	136	135	122	113	98	.	.	138	137	138	138	137	.	138	137	127	127	129	138	145	154	.	138	137	.	138
72	GCFC2	T00320	GCF [T00320]	140	140	140	140	140	140	140	140	140	140	.	140	140	.	140	140	140	147	147	144	138	137	124	.	100	.	.	.	.	.	.	.	.	.	.	.			.	.	.	.	.	.	.	.
73	E2F1	T01542	E2F-1 [T01542]	142	140	140	140	140	140	140	140	140	140	.	140	140	.	140	140	140	147	147	144	138	137	124	.	100	.	.	140	139	140	140	139	.	.	.	129	129	.	.	.	.	.	.	.	.	.
74	WT1	T00899	WT1 [T00899]	142	142	142	142	.	142	142	142	142	142	142	142	142	142	142	142	142	149	149	146	140	139	126	.	102	.	.	142	141	142	142	141	.	.	.	.	.	.	.	.	.	.	.	.	.	.
75	.	T00255	ENKTF-1 [T00255]	146	146	146	146	146	146	146	146	146	146	146	146	146	146	146	146	146	153	153	150	144	143	130	121	106	.	.	146	145	146	146	145	.	146	145	135	135	.	146	153	.	.	146	145	151	146
76	E2F1	T01542	E2F-1 [T01542]	148	148	148	148	148	148	148	148	148	148	148	148	148	148	148	148	148	155	155	152	146	145	132	123	108	.	.	148	147	148	148	147	149	148	.	137	137	.	148	155	.	.	148	147	153	148
77	PAX5	T00070	Pax-5 [T00070]	150	150	150	150	150	150	150	150	150	150	150	150	150	150	150	150	150	157	157	154	148	147	134	125	110	.	.	150	149	150	150	149	.	150	.	139	139	139	150	157	.	153	150	149	155	150
78	TP53	T00671	p53 [T00671]	150	150	150	150	150	150	150	150	150	150	150	150	150	150	150	150	150	157	157	154	148	147	134	125	110	.	.	150	149	150	150	149	.	150	.	139	139	139	150	157	.	153	150	149	155	150
79	TFAP2A	T00035	AP-2alphaA [T00035]	154	154	154	154	154	154	154	154	154	154	154	154	154	154	154	154	.	161	161	158	152	151	138	129	114	.	.	154	153	154	154	153	155	154	153	143	143	143	154	161	156	.	154	153	159	154
80	NR3C1	T00337	GR-alpha [T00337]	155	155	155	155	155	155	155	155	155	155	155	155	155	155	155	155	.	162	162	159	153	152	139	130	115	.	.	155	154	155	155	154	156	155	154	144	144	144	155	162	157	158	155	154	160	155
81	GTF2I	T00824	TFII-I [T00824]	159	159	159	159	159	159	159	159	159	159	159	159	159	159	.	159	159	166	166	163	157	156	.	134	119	.	.	159	158	159	159	158	160	159	158	148	148	148	159	.	161	162	159	158	164	159
82	PPARA:RXRA	T05221	PPAR-alpha:RXR-alpha [T05221]	159	159	159	159	159	159	159	159	159	159	159	159	.	.	159	159	.	.	.	163	157	156	143	134	119	.	.	159	158	159	159	158	.	159	158	148	.	148	159	166	161	162	159	158	164	159
83	NR3C1	T01920	GR-beta [T01920]	.	.	.	.	.	.	.	.	.	.	.	.	.	.	.	.	.	.	.	.	.	.	.	.	.	.	.	.	.	.	.	.	.	.	.	.	.	.	.	169	164	165	162	161	167	162
84	IKZF1	T02702	Ik-1 [T02702]	162	162	162	162	162	162	162	162	162	162	162	162	.	.	162	162	.	.	.	166	160	159	146	137	122	.	.	162	161	162	162	161	.	162	161	151	.	151	162	.	.	.	.	.	.	.
85	NFIC	T00094	NFI/CTF [T00094]	.	.	.	.	.	.	.	.	.	.	.	.	.	.	.	.	.	.	.	.	.	.	.	.	.	.	.	168	.	.	.	.	.	.	.	.	.	.	168	175	170	171	.	.	173	168
86	CEBPB	T00581	C/EBPbeta [T00581]	.	.	.	.	.	.	.	.	.	.	.	.	.	.	.	.	.	.	.	.	.	.	.	.	.	.	.	172	.	.	.	.	.	.	.	.	.	.	172	179	174	175	.	.	177	172
87	NF1	T00539	NF-1 [T00539]	.	.	.	.	.	.	.	.	.	.	.	.	.	.	.	.	.	.	.	.	.	.	.	.	.	.	.	172	.	.	.	.	.	.	.	.	.	.	172	179	174	175	.	.	177	172
88	NR3C1	T00337	GR-alpha [T00337]	175	175	175	175	175	175	175	175	175	175	175	175	175	175	175	175	175	182	182	179	173	172	159	150	135	1	.	175	174	175	175	174	176	175	174	164	164	.	175	182	.	178	175	174	180	175
89	TFAP2A	T00035	AP-2alphaA [T00035]	175	175	175	175	175	175	175	175	175	175	175	175	.	.	.	175	.	182	182	179	173	172	159	150	135	1	.	175	174	.	175	174	.	175	174	164	.	.	175	182	.	.	175	174	180	175
90	NR3C1	T00337	GR-alpha [T00337]	181	181	181	181	181	181	181	.	181	185	181	181	181	181	181	181	181	188	188	189	179	178	165	156	141	7	.	181	180	181	181	180	182	181	180	170	170	.	181	188	183	184	181	180	186	181
91	TFAP2A	T00035	AP-2alphaA [T00035]	181	181	181	181	181	181	181	.	181	.	181	181	181	181	181	181	181	188	188	.	179	178	165	156	141	7	.	181	180	181	181	180	182	181	180	170	170	.	181	188	183	184	181	180	186	181
92	NR3C1	T00337	GR-alpha [T00337]	185	185	185	185	185	185	185	185	185	.	185	185	185	185	185	185	185	192	192	.	183	182	169	160	145	11	.	185	184	185	185	184	186	185	184	174	174	174	185	192	.	.	185	184	190	185
93	GTF2I	T00824	TFII-I [T00824]	188	188	188	188	188	188	188	188	188	188	188	188	188	188	188	188	188	195	195	192	186	185	172	163	148	14	.	188	187	188	188	187	189	188	187	177	177	177	188	195	190	191	188	187	193	188
94	AHR	T01795	AhR [T01795]	192	192	192	192	192	192	192	192	.	192	192	192	192	192	192	192	192	199	199	196	190	189	176	167	152	18	2	192	191	192	.	191	193	192	191	181	181	.	192	199	.	.	192	191	197	192
95	NR3C1	T01920	GR-beta [T01920]	192	192	192	192	192	192	192	192	192	192	192	192	192	192	192	192	192	199	199	196	190	189	176	167	152	18	2	192	191	192	192	191	193	192	191	181	181	181	192	199	.	195	192	191	197	192
96	XBP1	T00902	XBP-1 [T00902]	193	193	193	193	193	193	193	193	193	193	193	193	193	193	193	193	193	200	200	197	191	190	177	168	153	19	3	193	192	193	193	192	194	193	192	182	182	182	193	200	.	.	193	192	198	193
97	YY1	T00915	YY1 [T00915]	193	193	193	193	193	193	193	193	193	193	193	193	193	193	193	193	193	200	200	197	191	190	177	168	153	19	3	193	192	193	193	192	194	193	192	182	182	182	193	200	.	196	193	192	198	193
98	.	T00255	ENKTF-1 [T00255]	194	194	194	194	194	194	194	194	194	194	194	194	194	194	194	194	194	201	201	198	192	191	178	169	154	20	4	194	193	194	194	193	195	194	193	183	183	183	194	201	.	.	194	193	199	194
99	RARB:RXRA	T05420	RAR-beta:RXR-alpha [T05420]	194	194	194	194	194	194	194	194	.	194	194	194	194	194	194	194	194	201	201	198	192	191	178	169	154	20	4	194	193	194	.	193	195	194	193	183	183	.	194	201	200	197	194	193	199	194
100	XBP1	T00902	XBP-1 [T00902]	.	.	.	.	.	.	.	.	.	.	.	.	.	.	.	.	.	.	.	.	.	.	.	.	.	.	.	.	.	.	.	.	.	.	.	.	.	.	.	.	.	.	.	.	.	.
101	VDR	T00885	VDR [T00885]	195	195	195	195	195	195	195	195	195	195	195	195	195	195	195	195	195	202	202	199	193	192	179	170	155	21	5	195	194	195	196	194	196	195	194	184	184	.	195	202	.	198	195	194	200	195
102	RARB	T00721	RAR-beta [T00721]	197	197	197	197	197	197	197	197	197	197	197	197	197	197	197	197	197	204	204	201	195	194	181	172	157	23	7	197	196	197	198	196	198	197	196	186	186	186	197	204	.	200	197	196	202	197
103	XBP1	T00902	XBP-1 [T00902]	.	.	.	.	.	.	.	.	.	.	.	.	.	.	.	.	.	.	.	.	.	.	.	.	.	.	.	.	.	.	.	.	.	.	.	.	.	.	.	.	.	.	.	.	.	.
104	FOXP3	T04280	FOXP3 [T04280]	198	198	198	198	198	198	198	198	.	198	198	198	198	198	198	198	198	205	205	202	196	195	182	173	158	24	8	198	197	198	198	197	199	198	197	187	187	.	198	205	.	201	198	197	203	198
105	CEBPB	T00581	C/EBPbeta [T00581]	.	.	.	.	.	.	.	.	.	.	.	.	.	.	.	.	.	.	.	.	.	.	.	.	.	.	.	.	.	.	.	.	.	.	.	.	.	.	.	.	.	.	.	.	.	.
106	RXRA	T01345	RXR-alpha [T01345]	199	199	199	199	199	199	199	199	199	199	199	199	199	199	199	199	199	206	206	203	197	196	183	174	159	25	9	199	198	199	200	198	200	199	198	188	188	188	199	206	201	202	199	198	204	199
107	PEX5:RXRA		PXR-1:RXR-alpha [T05671]	199	199	199	199	199	199	199	199	199	199	199	199	199	199	199	199	199	206	206	203	197	196	183	174	159	25	9	199	198	199	200	198	200	199	198	188	188	.	199	206	.	202	199	198	204	199
108	NF1	T00539	NF-1 [T00539]	203	203	203	203	203	203	203	203	.	.	203	203	203	203	203	203	203	.	.	207	201	200	187	.	163	29	13	203	202	203	204	202	204	203	.	191	191	191	.	.	.	.	.	.	.	.
109	NR3C1	T00337	GR-alpha [T00337]	.	.	.	.	.	.	.	.	.	.	.	.	.	.	.	.	.	.	.	.	.	.	.	.	.	.	.	.	.	.	.	.	.	.	.	.	.	.	.	.	.	.	.	.	.	.
110	CEBPB	T00581	C/EBPbeta [T00581]	205	205	205	205	205	205	205	205	.	.	205	205	205	205	205	205	205	.	.	209	203	202	189	.	165	31	15	205	204	205	206	204	206	205	.	193	193	193	.	.	.	.	.	.	.	.
111	NFIC	T00094	NFI/CTF [T00094]	.	.	.	.	.	.	.	.	.	.	.	.	.	.	.	.	.	.	.	.	.	.	.	.	.	.	.	.	.	.	.	.	.	.	.	.	.	.	.	.	.	.	.	.	.	.
112	NR3C1	T00337	GR-alpha [T00337]	.	.	.	.	.	.	.	.	.	.	.	.	.	.	.	.	.	.	.	.	.	.	.	.	.	.	.	.	.	.	.	.	.	.	.	.	.	.	.	.	.	.	.	.	.	.
113	TFAP2A	T00035	AP-2alphaA [T00035]	.	.	.	.	.	.	.	.	.	.	.	.	.	.	.	.	.	.	.	.	.	.	.	.	.	.	.	.	.	.	.	.	.	.	.	.	.	.	.	.	.	.	.	.	.	.
114	STAT4	T01577	STAT4 [T01577]	.	.	.	.	.	.	.	.	.	.	.	.	.	.	.	.	.	.	.	.	.	.	.	.	.	.	.	.	.	.	.	.	.	.	.	.	.	.	.	.	.	.	.	.	.	.
115	GTF2I	T00824	TFII-I [T00824]	.	.	.	.	.	.	.	.	.	.	.	.	.	.	.	.	.	.	.	.	.	.	.	.	.	.	.	.	.	.	.	.	.	.	.	196	196	196	207	214	209	207	.	.	212	207
116	E2F1	T01542	E2F-1 [T01542]	.	.	.	.	.	.	.	.	.	.	.	.	.	.	.	.	.	.	.	.	.	.	.	.	.	.	.	.	.	.	.	.	.	.	.	.	.	.	207	214	209	210	.	.	.	207
117	CEBPB	T00581	C/EBPbeta [T00581]	207	207	207	207	207	207	207	207	.	.	207	207	207	207	207	207	207	.	.	211	205	204	191	.	167	33	17	207	206	207	208	206	208	207	.	195	195	195	.	.	.	.	.	.	.	.
118	FOXP3	T04280	FOXP3 [T04280]	.	.	.	.	.	.	.	.	.	.	.	.	.	.	.	.	.	.	.	.	.	.	.	.	.	.	.	.	.	.	.	.	.	.	.	195	195	195	.	.	.	.	.	.	.	.
119	MYB	T00137	c-Myb [T00137]	211	211	211	211	211	211	211	211	211	211	211	211	211	211	211	211	211	218	218	215	209	208	195	186	171	37	21	211	210	211	212	210	.	211	.	.	.	.	211	218	.	219	211	210	.	211
120	MEF2A	T01005	MEF-2A [T01005]	218	218	218	218	218	218	218	218	218	218	218	218	218	218	218	218	218	225	225	222	216	215	202	193	178	44	28	218	217	218	219	217	235	218	217	207	207	207	218	225	.	221	218	217	223	218
121	NR3C1	T00337	GR-alpha [T00337]	.	.	.	.	.	.	.	.	.	.	.	.	.	.	.	.	.	.	.	.	.	.	.	.	.	.	.	.	.	.	.	.	.	.	.	.	.	.	.	.	.	.	.	.	.	.
122	GATA3	T00311	GATA-3 [T00311]	.	.	.	.	.	.	.	.	.	.	.	.	.	.	.	.	.	.	.	.	.	.	.	.	.	.	.	.	.	.	.	.	.	.	.	.	.	.	.	.	.	.	.	.	.	.
123	GATA1	T00306	GATA-1 [T00306]	.	.	.	.	.	.	.	.	.	.	.	.	.	.	.	.	.	.	.	.	.	.	.	.	.	.	.	.	.	.	.	.	.	.	.	.	.	.	.	.	.	.	.	.	.	.
124	E2F1	T01542	E2F-1 [T01542]	.	.	.	.	.	.	.	.	.	.	.	.	.	.	.	.	.	.	.	.	.	.	.	.	.	.	.	.	.	.	.	.	.	.	.	.	.	.	.	.	.	.	.	.	.	.
125	GTF2I	T00824	TFII-I [T00824]	229	229	229	229	229	229	229	229	.	229	229	229	229	229	229	229	.	236	236	233	227	226	213	.	189	55	39	229	228	229	230	228	230	229	228	.	.	.	.	.	.	.	.	.	.	.
126	GATA2	T00308	GATA-2 [T00308]	.	.	.	.	.	.	.	.	.	.	.	.	.	.	.	.	.	.	.	.	.	.	.	.	.	.	.	.	.	.	.	.	.	.	.		.	.		.	.	.	.	.	.	.
127	E2F1	T01542	E2F-1 [T01542]	.	.	.	.	.	.	.	.	.	.	.	.	.	.	.	.	.	.	.	.	.	.	.	.	.	.	.	.	.	.	.	.	.	.	.	216	216	.	.	.	.	.	.	.	.	.
128	NR3C1	T01920	GR-beta [T01920]	.	.	.	.	.	.	.	.	.	.	.	.	.	.	.	.	.	.	.	.	.	.	.	.	.	.	.	.	.	.	.	.	.	.	.	218	218	218	.	.	.	.	.	.	.	.
129	CEBPB	T00581	C/EBPalpha [T00105]	.	.	.	.	.	.	.	.	.	.	.	.	.	.	.	.	.	.	.	.	.	.	.	.	.	.	.	.	.	.	.	.	.	.	.	.	.	.	.	.	.	.	.	.	.	.
130	.	T00255	ENKTF-1 [T00255]	.	.	.	.	.	.	.	.	.	.	.	.	.	.	.	.	.	.	.	.	.	.	.	.	.	.	.	.	.	.	.	.	.	.	.	223	223	230	.	.	.	.	.	.	.	.
131	CEBPB	T00581	C/EBPbeta [T00581]	231	231	231	231	231	231	231	231	231	231	231	231	231	231	231	231	.	238	238	235	229	228	215	.	191	57	41	231	230	231	232	230	232	231	.	.	.	.	.	.	.	.	.	.	.	.
132	GTF2I	T00824	TFII-I [T00824]	232	232	232	232	232	232	232	232	.	232	232	232	232	232	232	232	.	239	239	236	230	229	216	.	192	58	42	232	231	232	233	231	233	232	.	.	.	.	.	.	.	.	.	.	.	.
133	E2F1	T01542	E2F-1 [T01542]	234	234	234	234	234	234	234	234	234	234	234	234	234	234	234	234	.	241	241	238	232	231	218	.	194	60	44	234	233	234	235	233	235	234	233	223	223	226	.	.	.	.	.	.	.	.
134	.	T00255	ENKTF-1 [T00255]	234	234	234	234	234	234	234	234	.	234	234	234	234	234	234	234	.	241	241	238	.	231	218	.	194	60	44	234	233	234	235	233	.	234	.	.	.	.	.	.	.	.	.	.	.	.
135	GTF2I	T00824	TFII-I [T00824]	245	245	245	245	245	245	245	245	245	245	245	245	245	245	245	245	245	252	252	249	243	242	229	206	205	71	55	245	244	245	246	244	246	245	244	234	234	234	231	238	.	234	.	.	236	231
136	NFIC	T00094	NFI/CTF [T00094]	245	245	245	245	245	245	245	245	245	245	245	245	245	245	245	245	245	252	252	249	243	242	229	207	205	71	55	245	244	245	246	.	246	245	.	235	235	235	232	239	234	.	.	.	237	232
137	E2F1	T01542	E2F-1 [T01542]	.	.	.	.	.	.	.	.	.	.	.	.	.	.	.	.	.	.	.	.	.	.	.	.	.	.	.	.	.	.	.	.	.	.	.	.	.	.	234	241	236	.	234	233	239	234
138	GTF2I	T00824	TFII-I [T00824]	252	252	252	252	252	252	252	252	252	252	252	252	252	252	252	252	252	259	259	256	250	249	236	220	212	78	62	252	251	252	253	251	253	252	.	.	.	.	245	252	247	243	245	244	250	245
139	TFAP2A	T00035	AP-2alphaA [T00035]	.	.	.	.	.	.	.	.	.	.	.	.	.	.	.	.	.	.	.	.	.	.	.	.	.	.	.	.	.	.	.	.	.	.	.	.	.	.	.	.	.	.	.	.	.	.
140	NR3C1	T00337	GR-alpha [T00337]	.	.	.	.	.	.	.	.	.	.	.	.	.	.	.	.	.	.	.	.	.	.	.	.	.	.	.	.	.	.	.	.	.	.	.	.	.	.	.	.	.	.	.	.	.	.
141	CEBPB	T00581	C/EBPbeta [T00581]	.	.	.	.	.	.	.	.	.	.	.	.	.	.	.	.	.	.	.	.	.	.	.	.	.	.	.	.								.	.	.	.	.	.	.	.	.	.	.
142	NF1	T00539	NF-1 [T00539]	259	.	.	259	259	259	.	259	259	259	259	259	259	259	259	.	259	266	266	.	257	256	243	227	219	85	69	259	258	259	260	258	260	.	251	241	241	241	252	259	.	255	.	258	257	252
143	PAX5	T00070	Pax-5 [T00070]	260	260	260	260	260	260	260	260	260	260	260	260	260	260	260	.	260	267	267	.	258	257	244	228	220	86	70	260	259	260	261	259	261	260	252	242	242	242	253	260	.	256	260	259	258	253
144	TP53	T00671	p53 [T00671]	.	.	.	.	.	.	.	.	.	.	.	.	.	.	.	.	.	.	.	.	.	.	.	.	.	.	.	.	.	.	.	.	.	.	.	.	.	.	.	.	.	.	.	.	.	.
145	.	T00255	ENKTF-1 [T00255]	263	263	263	263	263	263	263	263	263	263	263	263	263	263	263	.	263	270	270	.	261	260	247	231	223	89	.	263	262	263	264	262	.	263	255	245	245	.	256	.	.	.	263	262	.	.
146	TBP	T00820	TFIID [T00820]	263	263	263	263	263	263	263	263	263	263	263	263	263	263	263	.	263	270	270	.	261	260	247	231	223	89	.	263	262	263	264	262	.	263	255	245	245	.	256	.	.	.	263	262	.	.
147	TBP	T00820	TFIID [T00820]	.	.	.	.	.	.	.	.	.	.	.	.	.	.	.	.	.	.	.	.	.	.	.	.	.	.	.	.	.	.	.	.	.	.	.	251	251	251	.	.	.	.	.	.	.	.
148	CEBPB	T00581	C/EBPbeta [T00581]																												.	.	.	.	.	.	.	.	.	.	.	.	.	.	.	.	.	.	.
149	TBP	T00820	TFIID [T00820]	284	284	284	284	.	284	.	284	284	.	284	284	284	284	284	.	284	291	291	.	282	281	.	252	244	110	95	284	283	284	285	.	285	284	.	266	266	266	277	284	279	280	284	283	282	.
150	NR3C1	T05076	GR [T05076]	.	.	.	.	.	.	.	.	.	.	.	.	.	.	.	.	.	.	.	.	.	.	.	.	.	.	.	.	.	.	.	.	.	.	.	267	267	267	.	.	.	.	.	.	.	.
151	MEF2A	T01005	MEF-2A [T01005]	286	286	286	286	.	286	.	286	286	.	286	286	286	286	286	.	285	293	293	.	284	283	.	254	246	112	97	286	285	286	287	285	287	286	.	268	268	268	279	286	281	282	286	285	284	.
152	FOXA1	T02512	HNF-3alpha [T02512]	286	286	286	286	.	286	.	286	286	.	286	286	286	286	286	.	285	293	293	.	284	283	.	254	246	112	96	286	285	286	287	.	287	286	.	268	268	268	279	286	281	282	286	285	284	.
153	NR3C1	T01920	GR-beta [T01920]	287	287	287	287	.	287	.	287	287	.	287	287	287	287	287	.	286	294	294	.	285	284	.	255	247	113	98	287	286	287	288	.	288	287	.	269	269	269	280	287	282	283	287	286	285	.
[truncated: 49 more columns]

## Sheet: legend
Table S5: Putative transcription factor binding sites in Alu sequences. Color code based on Alu subfamily with all evaluated polymorphic Alu segregated based on subfamily. Colored boxes indicate putative TFBS conserved in the consensus sequence. Dark colored sites are highly conserved, 0% dissimilarity with TFBS. Basepair coordinates for the TFBS, as reported by PROMO, are listed for each factor.…
