# Supplementary material for: Alu insertion variants alter gene transcript levels
Source: HighWire-hosted journal article supplement (doi:10.1101/gr.261305.120), 2021-11-19
Supplement: Supplemental_Table_S6_final.xlsx [file Supplemental_Table_S6_final.xlsx]

## Sheet: Sheet1
Table S6: Sequences and cell lines for CRISPR editing at breast cancer risk loci.
Alu	Alu genotype in 293T	edit Alu genotype to:	cell lines with perfect edits	other edited lines (used in Fig S4)	guide 1	guide 2	repair template	repair template sequence
Alu-098	+/+	-/-	98-4; 98-11	n/a	GAGGTCTCACCAGATCTGGT	CCACCGCGCCCGGCCTGATC	Lh1158	AACTCCAGACACACACCACCTTTAAAAACTTAACAGTCACCAGGAGGGTCTGTGGTTTTTCTTGAAGTCAGTGGGAACAAGAACCCACCAGTTTTGGACAGTTTGGTGGTGTCCCCACCCAAATCTCATCTTGAATTACAGTTGTGATGATCCCCATGTGTCGTGGGAGAGACCTAGTGGGAGGTAATTGAGTCATGGGGTTACCTACCTTCATGCTGTTCTCATGATAGTGAGGTCTCACCAGATCTGGTGGTTTTACAACGGTCTTTATCTGCCTGTTTTTTTCTGCACTTTTCTTTGCTGCTGTCTTGTGAGGAAGGATGTGCTTGTGTCCGTTTCCACCGTGGTTGTAAGTTTCCTGAGGCCGCCTCAGCCATGCTGAACTGTGAGTCAAACCTC…
Alu-274	-/-	+/+	274-2; 274-12	274-29 (1 SNP)	TTACTACTGCCATGCTACCT	n/a	Lh1515	TTCACATTACACATCCATAAAATCACAGAGAAGCAATTCTATCTTGATATCTATTTCTCTCCCTCTCCCTGTATCTGTATCATTAATATCAATACCTATATGTATACCAACCTATATCTAAATTGATTTGCATCTTCCCATCCAGCAAGATCTTGCTTTGCAAATGAAGTTGCCTTCTTACTGTTTAAGACTGGTGGGGCCGGGCGCGGTGGCTCACGCCTGTAATCCCAGCACTTTGGGAGGCCGAGGCGGGTGGATCATGAGGTCAGGAGATCGAGACCATCCTGGCTAACAAGGTGAAACCCCGTCTCTACTAAAAATACAAAAAATTAGCCGGGCGCGGTGGCGGGCGCCTGTAGTCCCAGCTACTGGGGAGGCTGAGGCAGGAGAATGGCGTTG…
Alu-103	+/+	-/-	103-AK; 103-AY; 103-C	103-5 (2 bp deletion); 103-25 (2 bp deletion)	GCATTAAAAATTGCCTGGCT	ATTACTCACATCAATTAGCC	Lh1162	GTTTCATTCTCCACAACTCCCACCCCCCATTTCTTGAAGTTACTTCTCCAAAATAAACTCTCTGAAAGTCTCTATCCCAGGTCTTACTTTTTAGGGGGAATTTAGGTTAAGACAAGGTCTTGGGATGATTTCCTGCTTTTAGTCCACAATTTTTTTCAAAGTCATTTGAGATTTGGGATTTAAACAGGTTGCTTTAGTATTCCCCATGGCCTTGGGCTCAATGACATATTACTCACATCAGTTAGCCAGGCAATTTTTAATGCATCTACAAAGTGAAAGAAGATTGTAAAGATGGAAAAGTCATATATACAAAGTTCTCCATCTCCGTTACAACCCAAATCCCCTACTATGATATTAAAGTCAGCACGTTTTCTGTGAAGTGATTAATGTGTGCCCAGA…
Alu-271	+/-	+/+	271-14; 271-29	271-29 (2 bp insertion)	GAGTCCACATCTTTTTATAC	n/a	Lh1167	AGTCTTACCATCATCCTTAAATTTATTTTATTTAGGAAGGTACTAAAGTCACAGAAAGAATTTGAAAATATTTTCAATTGTACATTATAATTAATTATAATTAAATTCTTACTAGATTCAGATAATCTAAAAATTTTAAGACACAGACTTCCTCATGTAGTCAAGGAATGGATGGAACCTGAAAAACAGATGGTGCTGATTGTTGAGAAATGTAGGGTCAGCGAATTTAAGAATTCCCTGTTTCTAGTAACCTAGAGAAGTGATAGTCATGAGCAGATACCATCTTTCTACACGGGATTAGTGTGCCCTGTTACTCTTGCTACCTTGCTCTAGGAGTTATCAGAAAGAGAAGAGAGTAAAATCTAACCTGTATAAAAAGATGTGGACTCTGGTAGATTT…
Alu-271	+/-	-/-	271-AC; 271-T	n/a	GGAAGGAACTAGAGATCATA	CGGCCCACATCTTTTTATAC	Lh1513	TCTTACCATCATCCTTAAATTTATTTTATTTAGGAAGGTACTAAAGTCACAGAAAGAATTTGAAAATATTTTCAATTGTACATTATAATTAATTATAATTAAATTCTTACTAGATTCAGATAATCTAAAAATTTTAAGACACAGACTTCCTCATGTAGTCAAGGAATGGATGGAACCTGAAAAACAGATGGTGCTGATTGTTGAGAAATGTAGGGTCAGCGAATTTAAGAATTCCCTGTTTCTAGTAACCTAGAGAAGTGATAGTCATGAGCAGATACCATCTTTCTACACGGGATTAGTGTGCCCTGTTACTCTTGCTACCTTGCTCTAGGAGTTATCAGAAAGAGAAGAGAGTAAAATCTAACCTGTATAAAAAGATGTGGACTCTGGTAGATTTCT…
