# Supplementary material for: Alu insertion variants alter gene transcript levels
Source: HighWire-hosted journal article supplement (doi:10.1101/gr.261305.120), 2021-11-19
Supplement: Supplemental_Table_S7_final.xlsx [file Supplemental_Table_S7_final.xlsx]

## Sheet: Sheet1
Table S7: Primers for qRT-PCR
gene	primer 1	primer 2
RANBP9	GGGAGAAGCCATTGAAACAA	TGCCTGATGCTAAATTGTGG
NOL7	AAGAAATCGCCAGGAAAGGT	CCTGACAGACTGTACTTTTTGTACTTT
PTHLH	TCAGCTGTGTGGATTTCTGC	GGAGACTGGTTCAGCAGTGG
CCDC91	CAGAGGCTCCTTGAAATGCT	TCAGCATGCGCTTTTTCTAA
Pou5F1B	TCTGACCTGGCTAAGCTTCC	CCCCCACATAACTCATACGG
CASC11	CGGTTCTCCATAGGGTGATG	GCAGAAGGTCCGAAGAAAGA
MYC	GCTGCTTAGACGCTGGATTT	CAGCAGCTCGAATTTCTTCC
PVT1	TTGGGTCTCCCTATGGAATG	GGAGATGATTCAGCCTCCAC
TMEM75	CCTTCCCTGCTCTGACATTC	TTTCAACAAGGGACCACCTC
ACTB	CATGTACGTTGCTATCCAGGC	CTCCTTAATGTCACGCACGAT
